# Supplementary material for: Is LDL cholesterol associated with long-term mortality among primary prevention adults? A retrospective cohort study from a large healthcare system
Source: PubMed Central journal article supplement — BMJ Open. 2024 Mar 28;14(3):e077949. doi: 10.1136/bmjopen-2023-077949 (PMC10982736; doi:10.1136/bmjopen-2023-077949), 2024-03-28
Supplement: bmjopen-2023-077949.draft_revisions.pdf [file bmjopen-2023-077949.draft_revisions.pdf]

# BMJ Open

BMJ Open is committed to open peer review. As part of this commitment we make the peer review history of every article we publish publicly available.

When an article is published we post the peer reviewers' comments and the authors' responses online. We also post the versions of the paper that were used during peer review. These are the versions that the peer review comments apply to.

The versions of the paper that follow are the versions that were submitted during the peer review process. They are not the versions of record or the final published versions. They should not be cited or distributed as the published version of this manuscript.

BMJ Open is an open access journal and the full, final, typeset and author-corrected version of record of the manuscript is available on our site with no access controls, subscription charges or pay-per-view fees (<http://bmjopen.bmj.com>).

If you have any questions on BMJ Open's open peer review process please email [info.bmjopen@bmj.com](mailto:info.bmjopen@bmj.com)

# BMJ Open

## Assessment of LDL Cholesterol and Long-Term Mortality Among Primary Prevention Adults: A Cohort Study with Implications for Risk Assessment and Patient Counseling

|                               |                                                                                                                                                                                                                                                                             |
|-------------------------------|-----------------------------------------------------------------------------------------------------------------------------------------------------------------------------------------------------------------------------------------------------------------------------|
| Journal:                      | <i>BMJ Open</i>                                                                                                                                                                                                                                                             |
| Manuscript ID                 | bmjopen-2023-077949                                                                                                                                                                                                                                                         |
| Article Type:                 | Original research                                                                                                                                                                                                                                                           |
| Date Submitted by the Author: | 20-Jul-2023                                                                                                                                                                                                                                                                 |
| Complete List of Authors:     | Kip, Kevin; University of Pittsburgh Medical Center, Clinical Analytics<br>Diamond, David; University of South Florida, Department of Psychology<br>Mulukutla, Suresh; University of Pittsburgh, Heart and Vascular Institute<br>Marroquin, Oscar; UPMC, Clinical Analytics |
| Keywords:                     | EPIDEMIOLOGY, Primary Prevention, Adult cardiology < CARDIOLOGY                                                                                                                                                                                                             |
|                               |                                                                                                                                                                                                                                                                             |

SCHOLARONE™  
Manuscripts

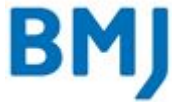

I, the Submitting Author has the right to grant and does grant on behalf of all authors of the Work (as defined in the below author licence), an exclusive licence and/or a non-exclusive licence for contributions from authors who are: i) UK Crown employees; ii) where BMJ has agreed a CC-BY licence shall apply, and/or iii) in accordance with the terms applicable for US Federal Government officers or employees acting as part of their official duties; on a worldwide, perpetual, irrevocable, royalty-free basis to BMJ Publishing Group Ltd ("BMJ") its licensees and where the relevant Journal is co-owned by BMJ to the co-owners of the Journal, to publish the Work in this journal and any other BMJ products and to exploit all rights, as set out in our [licence](#).

The Submitting Author accepts and understands that any supply made under these terms is made by BMJ to the Submitting Author unless you are acting as an employee on behalf of your employer or a postgraduate student of an affiliated institution which is paying any applicable article publishing charge ("APC") for Open Access articles. Where the Submitting Author wishes to make the Work available on an Open Access basis (and intends to pay the relevant APC), the terms of reuse of such Open Access shall be governed by a Creative Commons licence – details of these licences and which [Creative Commons](#) licence will apply to this Work are set out in our licence referred to above.

Other than as permitted in any relevant BMJ Author's Self Archiving Policies, I confirm this Work has not been accepted for publication elsewhere, is not being considered for publication elsewhere and does not duplicate material already published. I confirm all authors consent to publication of this Work and authorise the granting of this licence.

1  
2  
3 1  
4  
5 2 **Assessment of LDL Cholesterol and Long-Term Mortality Among Primary Prevention**  
6  
7 **Adults: A Cohort Study with Implications for Risk Assessment and Patient Counseling**  
8 3  
9

10 4  
11  
12 5 Kevin E. Kip, Ph.D.

13  
14 6 Clinical Analytics, UPMC, Pittsburgh, Pennsylvania

15  
16 7 [kipke2@upmc.edu](mailto:kipke2@upmc.edu)  
17  
18

19 8  
20  
21 9 David M. Diamond, Ph.D.

22  
23 10 University of South Florida, Tampa, Florida

24  
25 11 [ddiamond@usf.edu](mailto:ddiamond@usf.edu)  
26  
27

28 12  
29  
30 13 Suresh R. Mulukutla, MD

31  
32 14 Heart and Vascular Institute, UPMC, Pittsburgh, Pennsylvania

33  
34 15 [mulukutlasr@upmc.edu](mailto:mulukutlasr@upmc.edu)  
35  
36

37 16  
38  
39 17 Oscar C. Marroquin, MD

40  
41 18 Clinical Analytics, UPMC, Pittsburgh, Pennsylvania

42  
43 19 [marroquinoc@upmc.edu](mailto:marroquinoc@upmc.edu)  
44  
45

1  
2  
3 **21 Abstract**  
4

5 **22 Objectives.** Among primary prevention-type adults not on lipid-lowering therapy, results are  
6  
7  
8 **23** conflicting on the relationship between low density lipoprotein cholesterol (LDL-C) and long-  
9  
10 **24** term mortality. We sought to evaluate the relationship between LDL-C and all-cause long-term  
11  
12 **25** mortality in a real-world evidence population of adults.

13  
14 **26 Design.** Retrospective cohort study of adults during the period January 4, 2000 through  
15  
16  
17 **27** December 31, 2022.

18  
19 **28 Setting.** Large U.S. health care system.

20  
21 **29 Participants.** Non-diabetic adults aged 50 to 89 years not on statin therapy at baseline or within  
22  
23  
24 **30** 1-year and classified as primary prevention-type patients (e.g., no prior history of ASCVD). To  
25  
26 **31** mitigate potential reverse causation, patients who died within 1-year or had baseline total  
27  
28 **32** cholesterol (T-C)  $\leq 120$  mg/dL or LDL-C  $< 30$  mg/dL were excluded from analysis.

29  
30 **33 Main Exposure Measure.** Baseline LDL-C categories of 30-79, 80-99, 100-129, 130-159, 160-  
31  
32  
33 **34** 189, or  $\geq 190$  mg/dL.

34  
35 **35 Main Outcome Measure.** The primary outcome was all-cause mortality with follow-up starting  
36  
37 **36** 365 days after baseline cholesterol measurement.

38  
39 **37 Results.** Over a mean of 6.1 years of follow-up, a U-shaped relationship was observed between  
40  
41  
42 **38** the 6 LDL-C categories and mortality with crude 10-year mortality rates of 19.8%, 14.7%,  
43  
44  
45 **39** 11.7%, 10.7%, 10.1%, and 14.0%, respectively. Adjusted mortality hazard ratios as compared to  
46  
47 **40** the referent group of LDL-C 80-99 mg/dL, were: 30-79 mg/dL (1.23), 100-129 mg/dL (0.87),  
48  
49 **41** 130-159 mg/dL (0.88), 160-189 mg/dL (0.91),  $\geq 190$  mg/dL (1.19), respectively. Unlike LDL-C,  
50  
51 **42** both T-C/HDL cholesterol and triglycerides/HDL cholesterol ratios were independently  
52  
53  
54 **43** associated with long-term mortality.

1  
2  
3 44 **Conclusions.** Among non-diabetic primary prevention-type patients aged 50 to 89 years and not  
4  
5 45 on statin therapy, the lowest risk for long-term mortality appears to exist in the wide LDL-C  
6  
7 46 range of 100-189 mg/dL which is much higher than current recommendations and does not  
8  
9 47 support the prevailing premise that “lower LDL-C is better”. For counseling of these patients,  
10  
11 48 minimal consideration should be given to the LDL-C concentration.  
12  
13  
14  
15 49

16  
17  
18  
19  
20  
21  
22  
23  
24  
25  
26  
27  
28  
29  
30  
31  
32  
33  
34  
35  
36  
37  
38  
39  
40  
41  
42  
43  
44  
45  
46  
47  
48  
49  
50  
51  
52  
53  
54  
55  
56  
57

For peer review only

1  
2  
3 50  
4  
5  
6  
7**STRENGTHS AND LIMITATIONS OF THIS STUDY**

- The cohort consisted of a large “real-world” sample of adults across a large health system with long-term follow-up and sufficient precision for subgroup analyses.
- The study design mitigated potential for reverse causation of mortality by excluding patients who died within 1-year of baseline cholesterol measurement or had exceptionally low total or LDL cholesterol levels at baseline.
- The analysis was limited to all-cause mortality and thus was unable to assess cause-specific mortality.

24 51  
25  
26  
27  
28  
29  
30  
31  
32  
33  
34  
35  
36  
37  
38  
39  
40  
41  
42  
43  
44  
45  
46  
47  
48  
49  
50  
51  
52  
53  
54  
55  
56  
57

## 52 INTRODUCTION

53 Heart disease (HD), which includes atherosclerotic cardiovascular disease (ASCVD) as  
54 its primary component, is the leading cause of death in the United States.<sup>1-2</sup> A near universal but  
55 not absolute belief<sup>3</sup> is that high total cholesterol (T-C), low density lipoprotein cholesterol  
56 (LDL-C) in particular (the so-called “bad” cholesterol), is a root cause of ASCVD,<sup>4</sup> and that  
57 “lower is better” with a suggested optimal LDL-C level at or below 100 mg/dL.<sup>5-6</sup> In this regard,  
58 the American College of Cardiology (ACC) unequivocally implicates elevated LDL-C as a *de-*  
59 *facto* cause of ASCVD (and hence mortality) by stating that lowering of LDL-C with moderate  
60 intensity generic statins allows for efficacious and cost-effective primary prevention for those  
61 patients with an estimated 10-year risk of ASCVD  $\geq 7.5\%$ .<sup>7</sup>

62 An individual’s risk of ASCVD (within 10 years) is routinely estimated by health  
63 professionals using the online ACC-ASCVD Risk Estimator which incorporates not only T-C,  
64 LDL-C, and high-density lipoprotein cholesterol (HDL-C), but also age, sex, race, systolic and  
65 diastolic blood pressure, smoking and diabetes history, and current treatment (anti-hypertensive,  
66 statin, and/or aspirin therapy).<sup>8</sup> For primary prevention of ASCVD among adults ages 40-75  
67 years who are classified at 10-year “intermediate risk” of ASCVD) (estimated risk 7.5% to  
68 <20.0%), the ACC/AHA guidelines recommend that moderate-intensity statin therapy be  
69 considered with the goal of reducing LDL-C by 30-49%.<sup>9</sup> Again, the premise of this  
70 recommendation is that elevated LDL-C is an important causal risk factor for ASCVD and  
71 mortality.

72 The overall belief that “lower LDL-C is better” for primary prevention of ASCVD is  
73 supported by the 25.5% estimated prevalence of use of statins in this setting for adults aged 40 to  
74 75 years.<sup>10</sup> This frequent use of statins for primary prevention of ASCVD in adults may be



1  
2  
3 75 attributed, in part, to routine use of the ACC-ASCVD Risk Estimator in clinical practice. To  
4  
5 76 illustrate, **Table 1** shows ASCVD 10-year risk calculations for primary prevention by age, race,  
6  
7 77 and sex for a hypothetical non-diabetic patient with approximate guideline-driven “normal”  
8  
9 78 values for all clinical variables used in the risk equation. As seen, all males aged 59 years and  
10  
11 79 older will be classified as being of at least “intermediate risk” of ASCVD principally because of  
12  
13 80 their age and despite “normal” risk factor values, and hence, would potentially be referred for  
14  
15 81 statin therapy per the ACC/AHA guidelines.<sup>9</sup> Parenthetically, **Table 1** unexpectedly shows a  
16  
17 82 much more restricted range for 10-year risk estimates across years of age for blacks (males in  
18  
19 83 particular).

20  
21  
22  
23  
24 84 In the backdrop of the generally accepted belief that “lower LDL-C is better,” multiple  
25  
26 85 sources of information suggest that high LDL-C may not be a significant cause of ASCVD or  
27  
28 86 premature mortality. First, in brief, in an extensive recent meta-analysis of 60 randomized  
29  
30 87 controlled trials that compared either placebo, usual care or less-intensive therapy to active or  
31  
32 88 more potent lipid-lowering therapy, the number needed to treat (NNT) to reduce one death with  
33  
34 89 active or more potent lipid-lowering therapy was exceptionally high at 754 persons. Moreover,  
35  
36 90 there was no relationship between LDL-C percent lowering and risk of cardiovascular  
37  
38 91 mortality.<sup>11</sup> In the context of lipid-lowering therapy, these findings do not support the belief that  
39  
40 92 “lower LDL-C is better.”

41  
42  
43  
44 93 Second, acute coronary syndromes (ACS) routinely occur in patients with “normal”  
45  
46 94 LDL-C. For example, in a large cohort of 136,905 patients hospitalized with CAD (79%  
47  
48 95 attributed to ACS), of whom, 21% were on lipid-lowering therapy at admission, less than one-  
49  
50 96 quarter had an admission LDL-C >130 mg/dL.<sup>12</sup> In addition, women are generally considered to  
51  
52 97 be at overall lower risk of CHD mortality than men (e.g.,<sup>13</sup>), yet tend to have higher T-C and

1  
2  
3 98 LDL-C,<sup>14</sup> which is counterintuitive to higher LDL-C being associated with ASCVD and  
4  
5 99 premature mortality.  
6

7  
8 100 Third, the field of life insurance medicine, which focuses principally on predicting  
9  
10 101 mortality hazards,<sup>15</sup> arguably conducts the most robust actuarial analyses of life expectancy  
11  
12 102 (since organizational profit is directly related to prediction accuracy). Notably, in this field, the  
13  
14 103 T-C/HDL-C ratio has been shown to be the best single measure of all-cause mortality risk among  
15  
16 104 various lipid tests, including LDL-C.<sup>16</sup> This is further supported by examination of selected life  
17  
18 105 insurance underwriting guidelines (obtained publicly and summarized) from a large US  
19  
20 106 insurance company.<sup>17</sup> As seen in **Supplement Table 1**, T-C and HDL-C are used jointly in  
21  
22 107 policy underwriting, whereas LDL-C is not used, and lipid-lowering therapy is not emphasized.  
23  
24 108 Moreover, notwithstanding other important patient factors (e.g., blood pressure, smoking, etc.),  
25  
26 109 **Supplement Table 1** shows that a person 70 years of age or older can potentially qualify for a  
27  
28 110 “preferred-plus” life insurance policy having a T-C value as high as 300 mg/dL so long as the T-  
29  
30 111 C/HDL-C ratio is 5.0 or lower (i.e., HDL-C  $\geq$  60 mg/dL). This aligns with meta-  
31  
32 112 analyses/systematic reviews that report HDL-C to be inversely associated with all cause and  
33  
34 113 CVD mortality risks.<sup>18-19</sup>  
35  
36  
37  
38  
39

40 114 The above-described examples of conflicting beliefs and findings, along with general  
41  
42 115 propensity for health professionals to prescribe LDL-C lowering therapies for primary  
43  
44 116 prevention based in part through routine risk assessment with ACC-ASCVD Risk Estimator, call  
45  
46 117 for a critical appraisal and analysis of the relationship between LDL-C and long-term risk of  
47  
48 118 mortality in adults. Therefore, within a large, “real-world” healthcare system, we sought to  
49  
50 119 evaluate the relationship between LDL-C and all-cause long-term mortality among non-diabetic  
51  
52  
53  
54  
55  
56  
57

1  
2  
3 120 primary prevention-type adults aged 50 to 89 years. The analysis did not focus on the use of  
4  
5 121 statin therapy for primary prevention.  
6  
7  
8 122

## 10 123 **METHODS**

12 124 We conducted a retrospective cohort study of adults aged 50 to 89 years with hospital  
13  
14 125 and/or office visit data captured through the University of Pittsburgh Medical Center (UPMC)  
15  
16 126 electronic medical record (EMR) system. The date period for analysis was January 4, 2000  
17  
18 127 through December 31, 2022. The Quality Improvement Review Committee and Institutional  
19  
20 128 Review Board provided ethical review and approval of the study as an exempt protocol, and all  
21  
22 129 data remained deidentified for this analysis. Conduct and dissemination of results from this  
23  
24 130 observational study were performed in accordance with the STROBE (STrengthening the  
25  
26 131 Reporting of OBServational studies in Epidemiology) statement (see **Appendix**).  
27  
28  
29

### 30 132 **Data Sources**

31  
32  
33 133 Health-related data captured in the UPMC EMR and its ancillary clinical systems were  
34  
35 134 aggregated and harmonized in a clinical data warehouse, as previously described.<sup>20-21</sup> For all  
36  
37 135 patients, we accessed sociodemographic data, medical history, and billing charges for all  
38  
39 136 outpatient and inpatient encounters with diagnoses and procedures coded based on the  
40  
41 137 International Classification of Diseases, Ninth and 10th Revisions.<sup>22-23</sup> Deaths were identified  
42  
43 138 using hospital discharge dispositions of “ceased to breathe” sourced from the inpatient medical  
44  
45 139 record system; deaths after discharge were identified via the Death Master File from the Social  
46  
47 140 Security Administration’s National Technical Information Service.<sup>24</sup>  
48  
49  
50

### 51 141 **Eligibility Criteria**

1  
2  
3 142 The index date for selection and analysis of patients aged 50 to 89 years was the first date  
4  
5 143 of cholesterol measurement performed whether through hospitalization or in conjunction with an  
6  
7 144 office visit. For analysis, we required non-missing laboratory values for T-C, LDL-C, and HDL-  
8  
9 145 C. The patient population was restricted to “primary prevention” patients, defined as no prior  
10  
11 146 history of diabetes, coronary artery disease (CAD), carotid artery disease, peripheral vascular  
12  
13 147 disease, cardiac arrest, hemorrhagic or ischemic stroke, or transient ischemic attack (TIA). Other  
14  
15 148 eligibility criteria included: self-reported race of either white or black (due to very low  
16  
17 149 prevalence of other races), and not on statin therapy at baseline or within 1-year of follow-up. In  
18  
19 150 addition, to help offset potential bias due to reverse causation (i.e., very low cholesterol being a  
20  
21 151 marker for malnutrition and overall poor health), we excluded patients who died within 1-year of  
22  
23 152 the baseline cholesterol measurement, as well as those with baseline T-C and/or LDL-C values  
24  
25 153 of  $\leq 120$  or  $< 30$  mg/dL, respectively.

### 154 **Classification of Lipids**

155 From the baseline measurement, we classified patients into mutually exclusive lipid-level  
156 categories using common thresholds<sup>25</sup> including LDL-C (30-79, 80-99, 100-129, 130-159, 160-  
157 189, or 190 mg/dL or higher) and T-C (121-160, 161-200, 201-240, 241-280, or 281 mg/dL or  
158 higher). In supplemental analyses, we classified the T-C/HDL-C ratio as  $\leq 3.0$ ,  $> 3.0-4.0$ ,  $> 4.0-$   
159  $5.0$ ,  $> 5.0-6.0$ , or  $> 6.0$ , and triglycerides/HDL-C ratio into quintiles. Again, to potentially mitigate  
160 potential bias due to reverse causation, we selected the LDL-C category of 80-99 mg/dL as the  
161 referent group, rather than the lowest LDL-C group (30-79 mg/dL).

### 162 **Primary Outcome**

163 The primary outcome was all-cause mortality with the number of days and years of  
164 follow-up calculated starting 365 days after the baseline cholesterol measurement. For patients

1  
2  
3 165 who did not die, their length of follow-up was calculated starting 365 days after the baseline  
4  
5 166 cholesterol measurement and until their last record in the EMR system.  
6

### 7 167 **Statistical Analysis**

9  
10 168 For patients within the respective study-defined baseline LDL-C categories, means and  
11  
12 169 medians for continuous variables and counts and percentages for categorical variables are  
13  
14 170 presented. For each LDL-C category, the Kaplan-Meier method was used to calculate cumulative  
15  
16 171 mortality rates at 1-, 5-, and 10-year follow-up, with survival curves plotted at 6-month intervals  
17  
18 172 out to 12 years. Patients who did not die were censored at last date of follow-up. Cox regression  
19  
20 173 was used to estimate hazard ratios (and corresponding 95% confidence intervals) of mortality  
21  
22 174 over the full follow-up period by LDL-C. A crude model was first fit followed by an adjusted  
23  
24 175 model that included covariates selected by a forward stepwise approach using an entry *p*-value of  
25  
26 176 < .01 A second adjusted model was fit that added initiation of statin use any time after 1-year of  
27  
28 177 follow-up. Separate estimates for the relationship between initiation of statin use and mortality  
29  
30 178 are not presented due to expected immortal time bias (i.e., requirement to be alive during follow-  
31  
32 179 up to initiate statin use). Secondary analyses of lipid parameters used the same methods as for  
33  
34 180 LDC-C and included categories of the T-C/HDL-C and triglycerides/HDL-C ratios.  
35  
36  
37  
38  
39

### 40 181 **Subgroup Analyses**

41  
42 182 Subgroup analyses for estimation of the relationship between LDL-C category and  
43  
44 183 mortality included age (50-69, 70-89), sex (female, male), and baseline ASCVD risk  
45  
46 184 classification (low/borderline, intermediate, high, risk not determined).  
47  
48

49 185 We used SAS, version 9.4 (SAS Institute) for all analyses.  
50  
51  
52 186

## 53 187 **RESULTS**

1  
2  
3 188 The prevalence of patients within the six LDL-C categories was as follows: 30-79  
4  
5 189 (9.1%), 80-99 (18.3%), 100-129 (39.1%), 130-159 (24.4%), 160-189 (7.1%), or 190 mg/dL or  
6  
7 190 higher (2.0%) (**Table 2**). The mean age of patients ranged nominally across the six LDL-C  
8  
9 191 categories from 60.7 to 61.7 years. There was a general indication of overall higher baseline risk  
10  
11 192 in the group of patients with LDL-C from 30-79 mg/dL (**Table 2**) (consistent with the stated  
12  
13 193 concern of potential reverse causation). This included a numerically higher prevalence of current  
14  
15 194 smokers and those with a history of various comorbidities (e.g., atrial fibrillation, arrhythmia,  
16  
17 195 congestive heart failure, chronic obstructive pulmonary disease), as well as nominally higher  
18  
19 196 prevalence of selected medication use (e.g., ACE inhibitors, beta-blockers, diuretics, opioids,  
20  
21 197 direct oral anticoagulants). History of cancer was slightly higher in the two lowest LDL-C  
22  
23 198 categories, whereas estimated 10-year ASCVD risk was highest in those with baseline LDL-C  
24  
25 199  $\geq 190$  mg/dL.  
26  
27  
28  
29

### 30 **Overall Assessment of Mortality**

31  
32  
33 201 The mean and median follow-up after excluding the study requirement to have survived  
34  
35 202 at least 1-year after baseline cholesterol measurement was 6.1 and 5.9 years, respectively, and  
36  
37 203 17% of patients had 10 or more years of follow-up. In ascending order from lowest LDL-C  
38  
39 204 category (30-79 mg/dL) to highest LDL-C category ( $\geq 190$  mg/dL), 10-year cumulative mortality  
40  
41 205 rates were U-shaped at 19.8%, 14.7%, 11.7%, 10.7%, 10.1%, and 14.0% (**Table 3, Figures 1**  
42  
43 206 **and 2**). Adjusted mortality hazard ratios (HR) (model 2), as compared to the referent group of  
44  
45 207 LDL-C 80-99 mg/dL, were as follows: 30-79 mg/dL (1.23), 100-129 mg/dL (0.87), 130-159  
46  
47 208 mg/dL (0.88), 160-189 mg/dL (0.91),  $\geq 190$  mg/dL (1.19), respectively. Thus, the 3 LDL-C  
48  
49 209 categories within the range of 100-189 mg/dL showed similar, slightly lower mortality risk  
50  
51  
52 210 compared to the referent group of LDL-C 80-99 mg/dL.  
53  
54  
55  
56  
57

## 211 Subgroup Analyses

212 For the 2 different age groups, the 3 LDL-C categories within the range of 100-189  
213 mg/dL showed relatively similar and slightly lower mortality risk compared to the referent group  
214 of LDL-C 80-99 mg/dL (**Table 3, Figure 2**). In a similar manner for both females and males, the  
215 3 LDL-C categories within the range of 100-189 mg/dL showed relatively similar and slightly  
216 lower mortality risk compared to the referent group of LDL-C 80-99 mg/dL (**Supplement Table**  
217 **2**). Males with LDL-C  $\geq 190$  mg/dL did not have a significantly higher risk of mortality than  
218 those with LDL-C 80-99 mg/dL (adjusted HR = 1.06, 95% CI: 0.85-1.32). When stratified by  
219 10-year ASCVD risk score, again, the 3 LDL-C categories within the range of 100-189 mg/dL  
220 showed relatively similar and statistically lower mortality risk compared to the referent group of  
221 LDL-C 80-99 mg/dL (**Supplement Table 3**).

## 222 Secondary Lipid Measures

223 Patients with a T-C/HDL-C ratio  $>6.0$  had a significantly higher risk of mortality than  
224 those with a T-C/HDL-C ratio  $\leq 3.0$  (adjusted HR = 1.28, 95% CI: 1.18-1.38, **Supplement Table**  
225 **4**), with similar results by age (**Figure 2**). For the 3 T-C/HDL-C ratio categories  $\leq 3.0$ ,  $>3.0-4.0$ ,  
226 and  $>4.0-5.0$ , risk of mortality was similar. The triglycerides/HDL-C ratio showed the most  
227 consistent evidence of a gradient relationship with mortality with lower values (quintiles)  
228 progressively conferring lower risk of mortality (**Supplement Table 5**) and similar results by  
229 age (**Figure 2**). Compared to patients in the highest quintile of triglycerides/HDL-C ratio (value  
230 of  $\geq 3.44$ ), those in the lowest quintile (value of  $\leq 1.06$ ) had an estimated 24% lower risk of  
231 mortality (adjusted HR = 0.76, 95% CI: 0.72-0.81). Thus, in aggregate and irrespective of age,  
232 the secondary lipid measures of T-C/HDL-C ratio and triglycerides/HDL-C ratio appeared to be



233 more predictive of mortality than LDL-C, and a triglycerides/HDL-C ratio about 1 or lower  
234 appears to be optimal.

235

## 236 **DISCUSSION**

237 In this analysis among non-diabetic primary prevention-type patients aged 50 to 89 years  
238 not on statin therapy at baseline, we found no evidence of a gradient relationship between LDL-  
239 C and long-term mortality risk. Instead, we observed that within the entire LDL-C range of 100-  
240 189 mg/dL, mortality risk was similar and slightly lower than the referent LDL-C category of 80-  
241 99 mg/dL. These data conflict with the prevailing belief that “lower LDL-C is better”<sup>5-6</sup> yet align  
242 closely with results from a large general population study from Denmark among adults with a  
243 mean age of 58 years.<sup>26</sup> In that study, a U-shaped relationship between LDL-C and long-term  
244 mortality was also observed, and the concentration of LDL-C associated with the lowest risk of  
245 all-cause mortality among individuals not receiving lipid lowering treatment was 140 mg/dL.  
246 Collectively, these results indicate that the “optimal” or “normal” range for LDL-C for primary  
247 prevention among adults is likely wide and considerably higher than the suggested optimal LDL-  
248 C level of  $\leq 100$  mg/dL.<sup>5-6</sup>

249 For multiple reasons, we chose to evaluate a population of non-diabetic primary  
250 prevention type adults aged 50 to 89 years not on statin therapy. First, both the prevalence and  
251 potential indication for initiating lipid-lowering therapy is relatively high in this population.<sup>9,10,27</sup>  
252 Second, prevailing guidelines and philosophy for initiating lipid-lowering therapy for secondary  
253 prevention of ASCVD and among persons with diabetes are well entrenched.<sup>28-30</sup> Third,  
254 consideration of initiating lipid-lowering therapy for primary prevention, particularly among  
255 older adults, should be carefully weighed based on empirical data<sup>31-32</sup> and potential side effects,



256 including but not limited to muscle pain or weakness<sup>33</sup> and increased risk of developing  
257 diabetes.<sup>34-36</sup>

258       Beyond our principal finding of no indication that “lower LDL-C is better,” other  
259 prominent findings were that overall and independent of age, the T-C/HDL-C and  
260 triglycerides/HDL-C ratios were predictive of long-term mortality risk, the latter of which  
261 presented in a gradient manner. The importance of high HDL-C alone, or in conjunction with  
262 other lipids, has been recognized. In brief, oxidative stress and inflammation are integral in the  
263 pathophysiology of atherosclerosis and cardiovascular disease.<sup>37</sup> Importantly, HDL-C exerts  
264 several physiological roles, prevents oxidation of LDL, and inhibits expression of pro-  
265 inflammatory cytokines by macrophages, as well as expression of adhesion molecules by  
266 endothelial cells,<sup>38-40</sup> and it is inversely associated with both all cause and CVD mortality  
267 risks.<sup>18-19</sup> Moreover, it is likely not coincidental nor trivial that the field of life insurance  
268 medicine recognizes and prioritizes the importance of HDL-C over LDL-C in determining  
269 underwriting classifications.<sup>16,17,41</sup> Unfortunately, from a public health perspective, a meta-  
270 analysis of 31 randomized controlled trials on the use of HDL-C modifying treatments showed  
271 little to no effect on cardiovascular and all-cause mortality.<sup>42</sup>

272       There is an overall lack of consensus on the magnitude and statistical and clinical  
273 interpretation of the reduction in mortality risk potentially achieved with the use of LDL-C  
274 lowering therapies. Multiple reviews suggest that absolute mortality risk reductions from  
275 treatment with statins are small as compared to the more frequent reporting and emphasis of  
276 relative risk reductions.<sup>43-46</sup> Moreover, mortality reductions with recent use of PCSK-9 inhibitors  
277 to lower LDL-C have been unimpressive.<sup>47</sup> Our postulate from both this review (e.g.,<sup>11</sup>) and  
278 empirical analysis is that whatever small reductions in mortality risk may occur with use of

1  
2  
3 279 LDL-C lowering therapies, they are most likely not causally related to LDL-C lowering, but  
4  
5 280 potentially to more broad pleiotropic effects. For example, statin use has been shown to reduce  
6  
7 281 inflammatory markers,<sup>48</sup> reduce vascular endothelial growth factor (VEGF) concentrations,<sup>49</sup>  
8  
9 282 reduce platelet activity,<sup>50</sup> and increase nitric oxide bioavailability and stabilize atherosclerotic  
10  
11 283 plaques.<sup>51</sup> These potential mechanisms of statins, rather than concomitant lowering of LDL-C per  
12  
13 284 se, may be expected to result in some reduction of ASCVD events.  
14  
15

16  
17 285 Arguably, it is irrelevant to patients as to the exact mechanism(s) by which use of statins  
18  
19 286 may result in small absolute reductions in mortality risk. However, research suggests that use of  
20  
21 287 statins (and possibly other LDL-C lowering therapies) may provide some patients with a false  
22  
23 288 sense of security,<sup>52</sup> as expressed by higher caloric and fat intake and faster increase in BMI for  
24  
25 289 statin users than for nonusers.<sup>53</sup> This observation places a premium on health professionals  
26  
27 290 promoting established (causal) mechanisms that reduce future risk of major ASCVD events,  
28  
29 291 including weight, blood pressure, and blood sugar control, physical activity, avoidance of  
30  
31 292 smoking, and stress reduction. Similarly, our results suggest that adult non-diabetic patients  
32  
33 293 counselled for primary prevention of ASCVD be apprised of their estimated future risk of  
34  
35 294 ASCVD with minimal consideration of their LDL-C concentration and more consideration of the  
36  
37 295 T-C/HDL and triglyceride/HDL-C ratios along with other known causes of ASCVD (e.g.,  
38  
39 296 smoking, physical inactivity). Moreover, use of coronary artery calcium scoring in primary  
40  
41 297 prevention is supported by a wealth of data showing that it substantially improves risk prediction  
42  
43 298 including when combined with traditional risk factors and scores.<sup>54-56</sup> Lastly, our analysis  
44  
45 299 indicates that the routinely used ACC-ASCVD Risk Estimator over-emphasizes patient risk  
46  
47 300 simply on age (i.e., intermediate or high-risk classification) when in the context of having  
48  
49  
50  
51  
52  
53  
54  
55  
56  
57

1  
2  
3 301 “normal” parameters otherwise, and that the equation itself may have differential validity by  
4  
5 302 race.

### 8 303 **Limitations**

10 304 Our study has limitations. First, we were unable to assess cause-specific mortality which  
11  
12 305 would have provided additional insight into the relationship between LDL-C and CVD mortality.  
13  
14 306 Second, we chose the index date for follow-up mortality assessment to begin 1-year after  
15  
16 307 baseline cholesterol measurement to ideally minimize potential bias due to reverse causation  
17  
18 308 (i.e., low LDL-C being an overall marker of malnutrition and poor health). However, low LDL-C  
19  
20 309 has been frequently reported in cancer patients (e.g.,<sup>25,57,58</sup>) and many cancers have a viral  
21  
22 310 etiologic component<sup>59</sup> and with potentially long latency. Theoretically, some patients with the  
23  
24 311 lowest LDL-C values in our analysis may have been in the early stages of cancer development  
25  
26 312 and hence elevated long-term mortality risk. This is why we chose LDL-C 80-99 mg/dL as the  
27  
28 313 referent group (rather than 30-79 mg/dL), and the observation that mortality risk was similar  
29  
30 314 across a wide range of LDL-C values (100–189 mg/dL) argues against appreciable bias due to  
31  
32 315 reverse causation. Third, absence of statin use at baseline and within the first year of the study  
33  
34 316 (inclusion criterion) was based on patient reported data in the EMR and not from prescription  
35  
36 317 data – this leaves open the possibility for some misclassification. Lastly, we cannot rule out  
37  
38 318 potential residual confounding despite statistical adjustment for a large set of covariates  
39  
40 319 associated with mortality.

### 47 320 **Conclusions**

49 321 Our analysis indicates that among non-diabetic primary prevention-type patients aged 50  
50  
51 322 to 89 years and not on statin therapy, the lowest risk for long-term mortality exists in the wide  
52  
53 323 LDL-C range of 100-189 mg/dL which is much higher than current recommendations. Our

1  
2  
3 324 analysis also shows that lower T-C/HDL-C and triglycerides/HDL-C ratios are independently  
4  
5 325 associated with lower mortality risk, whereas LDL-C appears to be of limited to no predictive  
6  
7  
8 326 value. Lastly, our analysis indicates that the ACC-ASCVD Risk Estimator routinely used to  
9  
10 327 estimate 10-year risk of ASCVD, and corresponding risk classification (with corresponding  
11  
12 328 pharmacological treatment implications), overemphasizes individual patient risk by age alone  
13  
14  
15 329 and may have differential validity by race. Collectively, these observations suggest that adult  
16  
17 330 non-diabetic patients counselled for primary prevention of ASCVD be apprised of their  
18  
19 331 estimated future risk of ASCVD with minimal consideration of their LDL-C concentration and  
20  
21 332 more consideration of the T-C/HDL and triglycerides/HDL-C ratios along with other established  
22  
23  
24 333 causes of ASCVD (e.g., high blood pressure, smoking, physical inactivity) and potentially  
25  
26 334 coronary artery calcium scoring.  
27  
28  
29 335

### 30 336 **Figure Legends**

31  
32  
33 337 **Figure 1.** Plot of cumulative mortality rates in 6-month intervals over 12 years of follow-up  
34  
35 338 by baseline LDL-C category. Dashed lines depict the 3 lowest LDL-C categories  
36  
37 339 (30-79, 80-99, 100-129 mg/dL) and solid lines depict the highest LDL-C  
38  
39 340 categories (130-159, 160-189,  $\geq 190$  mg/dL).

40  
41  
42 341 **Figure 2.** Plot of mortality hazard ratios (HR, filled circles) and 95% confidence intervals  
43  
44 342 (vertical lines) across categories of LDL cholesterol (top), total cholesterol to  
45  
46 343 HDL cholesterol ratio (middle), and triglycerides to HDL cholesterol ratio  
47  
48 344 (bottom). The left side of the graph is for patients aged 50-69 years; the right side  
49  
50 345 is for patients aged 70-89 years. The dashed line reflects the referent group null  
51  
52 346 value (1.0) for the HR. Q: quintile.  
53  
54  
55  
56 347

1  
2  
3 348 **Author Affiliations.**  
4

5 349 Kevin E. Kip, Ph.D.  
6

7  
8 350 Clinical Analytics, UPMC, Pittsburgh, Pennsylvania  
9

10 351 [kipke2@upmc.edu](mailto:kipke2@upmc.edu)  
11

12 352  
13

14  
15 353 David M. Diamond, Ph.D.  
16

17 354 University of South Florida, Tampa, Florida  
18

19 355 [ddiamond@usf.edu](mailto:ddiamond@usf.edu)  
20

21 356  
22

23  
24 357 Suresh R. Mulukutla, MD  
25

26 358 Heart and Vascular Institute, UPMC, Pittsburgh, Pennsylvania  
27

28 359 [mulukutlasr@upmc.edu](mailto:mulukutlasr@upmc.edu)  
29

30 360  
31

32 361 Oscar C. Marroquin, MD  
33

34  
35 362 Clinical Analytics, UPMC, Pittsburgh, Pennsylvania  
36

37 363 [marroquinoc@upmc.edu](mailto:marroquinoc@upmc.edu)  
38

39 364  
40

41  
42 365 **Corresponding Author.**  
43

44 366 Kevin E. Kip, PhD, Vice President of Clinical Analytics, UPMC Health Services Division, 3600  
45

46 367 Forbes & Meyran, Forbes Tower, 9th Floor, Suite 9030, Pittsburgh, PA 15213; e-mail,  
47

48 368 [kipke2@upmc.edu](mailto:kipke2@upmc.edu)  
49

50 369  
51

52 370  
53  
54  
55  
56  
57

1  
2  
3 371 **Contributors.**  
4

5 372 Kevin E. Kip, Ph.D. Conception, statistical analysis, writing, and editing  
6

7 373 David M. Diamond. Ph.D. Conception, critical review, and editing  
8

9 374 Suresh R. Mulukutla, MD. Critical review, and editing  
10

11 375 Oscar C. Marroquin, MD. Conception, critical review, and editing  
12  
13  
14  
15 376

16  
17 377 **Primary Funding Source.** This research received no specific grant from any funding agency in  
18  
19 378 the public, commercial, or not-for-profit sectors.  
20  
21  
22 379

23  
24 380 **Competing Interests Statement.** None.  
25  
26 381

27  
28 382 **Patient and Public Involvement.** Patients and/or the public were not involved in the design,  
29  
30 383 conduct, reporting, or dissemination of this research.  
31  
32 384

33  
34  
35 385 **Patient Consent for Publication.** Not applicable.  
36  
37 386

38  
39  
40 387 **Ethics Approval.** The Quality Improvement Review Committee and Institutional Review Board  
41  
42 388 at the University of Pittsburgh Medical Center provided ethical review and approval of the study  
43  
44 389 as an exempt protocol, and all data remained deidentified for this analysis.  
45  
46  
47 390

48  
49 391 **Provenance and Peer Review.** Not commissioned, externally peer reviewed.  
50  
51 392

1  
2  
3 393 **Reproducible Research Statement.** *Study protocol:* No separate study protocol was required a  
4  
5 394 priori, as this retrospective analysis was deemed a quality improvement initiative with ethical  
6  
7 395 review and approval granted by the UPMC Quality Improvement Review Committee and  
8  
9  
10 396 Institutional Review Board. *Statistical code:* Selected statistical code may be requested from Dr.  
11  
12 397 Kevin Kip (e-mail, kipke2@upmc.edu). *Data set:* The data set contains protected health  
13  
14 398 information and will not be available.  
15  
16  
17 399  
18  
19 400  
20  
21 401  
22  
23  
24 402  
25  
26  
27  
28  
29  
30  
31  
32  
33  
34  
35  
36  
37  
38  
39  
40  
41  
42  
43  
44  
45  
46  
47  
48  
49  
50  
51  
52  
53  
54  
55  
56  
57

403 **References**

- 404 1. Heron M. Deaths: Leading Causes for 2019. Centers for Disease Control and Prevention,  
405 National Vital Statistics Reports, Vol. 70, No. 9, July 26, 2021. Available at:  
406 <https://www.cdc.gov/nchs/data/nvsr/nvsr70/nvsr70-09-508.pdf>. Accessed June 9, 2023.
- 407 2. US Centers for Disease Control and Prevention. Leading causes of death and injury.  
408 Available at <https://www.cdc.gov/injury/wisqars/LeadingCauses.html>. Accessed June 9,  
409 2023.
- 410 3. Ravnskov U, de Lorgeril M, Diamond DM, et al. LDL-C does not cause cardiovascular  
411 disease: a comprehensive review of the current literature. *Expert Rev Clin Pharmacol*  
412 2018; 10:959-70.
- 413 4. Ference BA, Ginsberg HN, Graham I, et al. Low-density lipoproteins cause  
414 atherosclerotic cardiovascular disease. 1. Evidence from genetic, epidemiologic, and  
415 clinical studies. A consensus statement from the European Atherosclerosis Society  
416 Consensus Panel. *Eur Heart J* 2017; 38:2459-72.
- 417 5. American Heart Association. What is cholesterol? Available at: <https://www.heart.org/-/media/Files/Health-Topics/Cholesterol/What-is-Cholesterol.pdf>. Accessed June 9, 2023.
- 418
- 419 6. O'Keefe JH Jr, Cordain L, Harris WH, Moe RM, Vogel R. Optimal low-density  
420 lipoprotein is 50 to 70 mg/dl: lower is better and physiologically normal. *J Am Coll*  
421 *Cardiol* 2004; 43:2142-6.
- 422 7. Grundy SM, Stone NJ, Bailey AL, et al. Guideline on the management of blood  
423 cholesterol: A report of the American College of Cardiology/American Heart Association  
424 Task Force on Clinical Practice Guidelines. *Circulation* 2019; 139:e1082-e1143. Epub  
425 2018 Nov 10. Erratum in: *Circulation* 2019; 18:e1182-e1186.



- 1  
2  
3 426 8. American College of Cardiology. ASCVD Risk Estimate Plus. Available at:  
4  
5 427 <https://tools.acc.org/ascvd-risk-estimator-plus/#!/calculate/estimate/>. Accessed June 9,  
6  
7 428 2023.  
8  
9  
10 429 9. Arnett DK, Blumenthal RS, Albert MA, et al. 2019 ACC/AHA guideline on the primary  
11  
12 430 prevention of cardiovascular disease: A report of the American College of  
13  
14 431 Cardiology/American Heart Association Task Force on Clinical Practice Guidelines.  
15  
16 432 *Circulation* 2019; 140:e596-e646. Erratum in: *Circulation* 2019; 140:e649-e650. Erratum  
17  
18 433 in: *Circulation* 2020; 141:e60. Erratum in: *Circulation* 2020; 141:e774.  
19  
20  
21 434 10. Jacobs JA, Addo DK, Zheutlin AR, et al. Prevalence of statin use for primary prevention  
22  
23 435 of atherosclerotic cardiovascular disease by race, ethnicity, and 10-year disease risk in the  
24  
25 436 US: National Health and Nutrition Examination Surveys, 2013 to March 2020. *JAMA*  
26  
27 437 *Cardiol* 2023; 8:443–52.  
28  
29  
30 438 11. Ennezat PV, Guerbaai RA, Maréchaux S, Le Jemtel TH, François P. Extent of low-  
31  
32 439 density lipoprotein cholesterol reduction and all-cause and cardiovascular mortality  
33  
34 440 benefit: A systematic review and meta-analysis. *J Cardiovasc Pharmacol* 2023; 81:35-  
35  
36 441 44.  
37  
38  
39 442 12. Sachdeva A, Cannon CP, Deedwania PC, et al. Lipid levels in patients hospitalized with  
40  
41 443 coronary artery disease: an analysis of 136,905 hospitalizations in Get With The  
42  
43 444 Guidelines. *Am Heart J* 2009; 157:111-17.  
44  
45  
46 445 13. Bots SH, Peters SAE, Woodward M. Sex differences in coronary heart disease and stroke  
47  
48 446 mortality: a global assessment of the effect of ageing between 1980 and 2010. *BMJ Glob*  
49  
50 447 *Health* 2017; 27;2(2):e000298.  
51  
52  
53  
54  
55  
56  
57

- 1  
2  
3 448 14. Shohaimi S, Boekholdt MS, Luben R, Wareham NJ, Khaw KT. Distribution of lipid  
4  
5 449 parameters according to different socio-economic indicators- the EPIC-Norfolk  
6  
7 450 prospective population study. *BMC Public Health* 2014; 14:782.  
8  
9  
10 451 15. Kneepkens RF, Lindeboom R. Age dependent decline of relative risks in life insurance  
11  
12 452 medical underwriting. *J Insur Med* 2014; 44:170-83.  
13  
14 453 16. Fulks M, Stout RL, Dolan VF. Association of cholesterol, LDL, HDL, cholesterol/HDL  
15  
16 454 and triglyceride with all-cause mortality in life insurance applicants. *J Insur Med* 2009;  
17  
18 455 41:244-53. Erratum in: *J Insur Med* 2011; 42:108.  
19  
20  
21 456 17. MetLife. The Condensed Underwriting Guide. May 2013. Available at:  
22  
23 457 [http://www.cassaniinsurance.com/wp-content/uploads/2018/02/Met-Life-  
26  
27 459 18. Liu L, Han M, Qie R, et al. A dose-response meta-analysis to evaluate the relationship  
28  
29 460 between high-density lipoprotein cholesterol and all-cause and cardiovascular disease  
30  
31 461 mortality. \*J Endocrinol Invest\* 2022; 45:551-62.  
32  
33 462 19. Ravnskov U, Diamond DM, Hama R, et al. Lack of an association or an inverse  
34  
35 463 association between low-density-lipoprotein cholesterol and mortality in the elderly: a  
36  
37 464 systematic review. \*BMJ Open\* 2016; 6:e010401.  
38  
39  
40 465 20. Kip KE, McCreary EK, Collins K, et al. Evolving real-world effectiveness of monoclonal  
41  
42 466 antibodies for treatment of COVID-19: A cohort study. \*Ann Intern Med\* 2023; 176:496-  
43  
44 467 504.  
45  
46  
47 468 21. Reitz KM, Seymour CW, Vates J, et al. Strategies to Promote ResiliencY \(SPRY\): a  
48  
49 469 randomised embedded multifactorial adaptative platform \(REMAP\) clinical trial protocol  
50  
51  
52  
53  
54  
55  
56  
57](http://www.cassaniinsurance.com/wp-content/uploads/2018/02/Met-Life-<br/>24<br/>25 458 condensed_uw_guide.pdf)

- 1  
2  
3 470 to study interventions to improve recovery after surgery in high-risk patients. *BMJ Open*.  
4  
5 471 2020; 10:e037690.  
6  
7  
8 472 22. Centers for Disease Control and Prevention. International Classification of Diseases,  
9  
10 473 Ninth Revision, Clinical Modification (ICD-9-CM). Accessed at  
11  
12 474 [www.cdc.gov/nchs/icd/icd9cm.htm](http://www.cdc.gov/nchs/icd/icd9cm.htm) on 13 April 2022.  
13  
14  
15 475 23. Centers for Disease Control and Prevention. International Classification of Diseases,  
16  
17 476 Tenth Revision, Clinical Modification (ICD-10-CM). Accessed at  
18  
19 477 [www.cdc.gov/nchs/icd/icd-10-cm.htm](http://www.cdc.gov/nchs/icd/icd-10-cm.htm) on 13 April 2022.  
20  
21  
22 478 24. Social Security Administration. Requesting SSA's Death Information. Accessed at  
23  
24 479 [www.ssa.gov/dataexchange/request\\_dmf.html](http://www.ssa.gov/dataexchange/request_dmf.html) on 13 April 2022.  
25  
26 480 25. MedlinePlus [Internet]. Bethesda (MD): National Library of Medicine (US). LDL: The  
27  
28 481 "Bad" Cholesterol. Available at: <https://medlineplus.gov/ldlthebadcholesterol.html>.  
29  
30  
31 482 Accessed June 16, 2023.  
32  
33 483 26. Johannesen CDL, Langsted A, Mortensen MB, Nordestgaard BG. Association between  
34  
35 484 low density lipoprotein and all cause and cause specific mortality in Denmark:  
36  
37  
38 485 prospective cohort study. *BMJ* 2020; 371:m4266: Erratum in: *BMJ* 2021; 12;372.  
39  
40 486 27. Lloyd-Jones DM, Braun LT, Ndumele CE, et al. Use of risk assessment tools to guide  
41  
42 487 decision-making in the primary prevention of atherosclerotic cardiovascular disease: A  
43  
44 488 special report from the American Heart Association and American College of  
45  
46  
47 489 Cardiology. *Circulation* 2019; 139:e1162-e1177. Erratum in: *Circulation* 2019;  
48  
49 490 139:e1188.  
50  
51 491 28. Banach M, Penson PE. Statins and LDL-C in secondary prevention-so much progress, so  
52  
53 492 far to go. *JAMA Netw Open* 2020; 3:e2025675.  
54  
55  
56  
57  
58  
59  
60

- 1  
2  
3 493 29. Tecson KM, Kluger AY, Cassidy-Bushrow AE, et al. Usefulness of statins as secondary  
4  
5 494 prevention against recurrent and terminal major adverse cardiovascular events. *Am J*  
6  
7 495 *Cardiol* 2022; 176:37-42.
- 8  
9  
10 496 30. Stone NJ, Robinson JG, Lichtenstein AH, et al; American College of  
11  
12 497 Cardiology/American Heart Association Task Force on Practice Guidelines. 2013  
13  
14 498 ACC/AHA guideline on the treatment of blood cholesterol to reduce atherosclerotic  
15  
16 499 cardiovascular risk in adults: a report of the American College of Cardiology/American  
17  
18 500 Heart Association Task Force on Practice Guidelines. *J Am Coll Cardiol* 2014; 63(25 Pt  
19  
20 501 B):2889-34. Erratum in: *J Am Coll Cardiol* 2014; 63(25 Pt B):3024-25. Erratum in: *J Am*  
21  
22 502 *Coll Cardiol* 2015; 66:2812.
- 23  
24  
25  
26 503 31. Gurwitz JH, Go AS, Fortmann SP. Statins for primary prevention in older adults:  
27  
28 504 uncertainty and the need for more evidence. *JAMA* 2016; 316:1971-72.
- 29  
30  
31 505 32. Han BH, Sutin D, Williamson JD, et al. ALLHAT Collaborative Research Group. Effect  
32  
33 506 of statin treatment vs. usual care on primary cardiovascular prevention among older  
34  
35 507 adults: The ALLHAT-LLT Randomized Clinical Trial. *JAMA Intern Med* 2017; 177:955-  
36  
37 508 65.
- 38  
39  
40 509 33. Cholesterol Treatment Trialists' Collaboration. Effect of statin therapy on muscle  
41  
42 510 symptoms: an individual participant data meta-analysis of large-scale, randomised,  
43  
44 511 double-blind trials. *Lancet* 2022; 400:832-45. Erratum in: *Lancet* 2022; 400:1194.
- 45  
46  
47 512 34. Mansi IA, Chansard M, Lingvay I, Zhang S, Halm EA, Alvarez CA. Association of statin  
48  
49 513 therapy initiation with diabetes progression: A retrospective matched-cohort study. *JAMA*  
50  
51 514 *Intern Med* 2021; 181:1562-74.

- 1  
2  
3 515 35. Crandall JP, Mather K, Rajpathak SN, et al. Statin use and risk of developing diabetes:  
4  
5 516 results from the Diabetes Prevention Program. *BMJ Open Diabetes Res Care* 2017;  
6  
7 517 5:e000438. Erratum in: *BMJ Open Diabetes Res Care* 2017; 5: e000438corr1.  
8  
9  
10 518 36. Abbasi F, Lamendola C, Harris CS, et al. Statins are associated with increased insulin  
11  
12 519 resistance and secretion. *Arterioscler Thromb Vasc Biol* 2021; 41:2786-97.  
13  
14  
15 520 37. Ho E, Karimi Galouhahi K, Liu CC, Bhindi R, Figtree GA. Biological markers of  
16  
17 521 oxidative stress: applications to cardiovascular research and practice. *Redox Biol* 2013;1:  
18  
19 522 483–91.  
20  
21  
22 523 38. Mackness B, Mackness M. The antioxidant properties of high-density lipoproteins in  
23  
24 524 atherosclerosis. *Panminerva Med* 2010; 54:83–90.  
25  
26 525 39. Cockerill GW, Rye KA, Gamble JR, Vadas MA, Barter PJ. High-density lipoproteins  
27  
28 526 inhibit cytokine-induced expression of endothelial cell adhesion molecules. *Arterioscler*  
29  
30 527 *Thromb Vasc Biol* 1995; 15:1987–94.  
31  
32  
33 528 40. Nicholls SJ, Rye KA, Barter PJ. High-density lipoproteins as therapeutic targets. *Curr*  
34  
35 529 *Opin Lipidol* 2005; 16:345–9.  
36  
37  
38 530 41. Gleeson R. Atherogenic dyslipidemia--a medical underwriter's iceberg. *J Insur Med*  
39  
40 531 2009; 41:264-9.  
41  
42 532 42. Riaz H, Khan SU, Rahman H, et al. Effects of high-density lipoprotein targeting  
43  
44 533 treatments on cardiovascular outcomes: A systematic review and meta-analysis. *Eur J*  
45  
46 534 *Prev Cardiol* 2019; 26:533-43.  
47  
48  
49 535 43. Byrne P, Demasi M, Jones M, Smith SM, O'Brien KK, DuBroff R. Evaluating the  
50  
51 536 association between low-density lipoprotein cholesterol reduction and relative and  
52  
53  
54  
55  
56  
57

- 1  
2  
3 537 absolute effects of statin treatment: A systematic review and meta-analysis. *JAMA Intern*  
4  
5 538 *Med* 2022; 182:474-81. Erratum in: *JAMA Intern Med* 2022; 182:579.  
6  
7  
8 539 44. Diamond DM, Leaverton PE. Historical review of the use of relative risk statistics in the  
9  
10 540 portrayal of the purported hazards of high LDL cholesterol and the benefits of lipid-  
11  
12 541 lowering therapy. *Cureus* 2023; 15:e38391. Erratum in: *Cureus* 2023; 15:c116.  
13  
14  
15 542 45. Ravnskov U, Alabdulgader A, de Lorgeril M, et al. The new European guidelines for  
16  
17 543 prevention of cardiovascular disease are misleading. *Expert Rev Clin Pharmacol* 2020;  
18  
19 544 13:1289-94.  
20  
21  
22 545 46. Diamond DM, Ravnskov U. How statistical deception created the appearance that statins  
23  
24 546 are safe and effective in primary and secondary prevention of cardiovascular disease.  
25  
26 547 *Expert Rev Clin Pharmacol* 2015; 8:201-10.  
27  
28  
29 548 47. Dicembrini I, Giannini S, Ragghianti B, Mannucci E, Monami M. Effects of PCSK9  
30  
31 549 inhibitors on LDL cholesterol, cardiovascular morbidity and all-cause mortality: a  
32  
33 550 systematic review and meta-analysis of randomized controlled trials. *J Endocrinol Invest*  
34  
35 551 2019; 42:1029-39.  
36  
37  
38 552 48. Tabrizi R, Tamtaji OR, Mirhosseini N, et al. The effects of statin use on inflammatory  
39  
40 553 markers among patients with metabolic syndrome and related disorders: A systematic  
41  
42 554 review and meta-analysis of randomized controlled trials. *Pharmacol Res* 2019; 141:85-  
43  
44 555 103.  
45  
46  
47 556 49. Sahebkar A, Ponziani MC, Goitre I, Bo S. Does statin therapy reduce plasma VEGF  
48  
49 557 levels in humans? A systematic review and meta-analysis of randomized controlled trials.  
50  
51 558 *Metabolism* 2015; 64:1466-76.  
52  
53  
54  
55  
56  
57  
58  
59  
60

- 1  
2  
3 559 50. Puccetti L, Pasqui AL, Pastorelli M, et al. Time-dependent effect of statins on platelet  
4  
5 560 function in hypercholesterolaemia. *Eur J Clin Invest* 2002; 32:901-8.  
6  
7  
8 561 51. Davignon J. Beneficial cardiovascular pleiotropic effects of statins. *Circulation* 2004;  
9  
10 562 109(23 Suppl 1):III39-43.  
11  
12 563 52. Redberg RF. Statins and weight gain. *JAMA Intern Med* 2014; 174:1046.  
13  
14 564 53. Sugiyama T, Tsugawa Y, Tseng CH, Kobayashi Y, Shapiro MF. Different time trends of  
15  
16 565 caloric and fat intake between statin users and nonusers among US adults: gluttony in the  
17  
18 566 time of statins? *JAMA Intern Med* 2014; 174:1038-45.  
19  
20  
21 567 54. Blumenthal RS, Cainzos-Achirica M. The Ever-Growing Role of Coronary Artery  
22  
23 568 Calcium in Primary Prevention. Available at: <https://www.acc.org/Latest-in-Cardiology/Articles/2021/06/21/13/05/The-Ever-Growing-Role-of-CAC-in-Primary-Prevention>. Accessed June 20, 2023.  
24  
25  
26 569  
27  
28 570  
29  
30  
31 571 55. Nasir K, Cainzos-Achirica M. Role of coronary artery calcium score in the primary  
32  
33 572 prevention of cardiovascular disease. *BMJ* 2021; 373:n776.  
34  
35 573 56. Bittencourt MS, Nasir K, Santos RD, Al-Mallah MH. Very high LDL cholesterol: The  
36  
37 574 power of zero passes another test. *Atherosclerosis* 2020; 292:207-8.  
38  
39  
40 575 57. Tanne JH. Meta-analysis says low LDL cholesterol may be associated with greater risk of  
41  
42 576 cancer. *BMJ* 2007; 335:177.  
43  
44  
45 577 58. Benn M, Tybjaerg-Hansen A, Stender S, Frikke-Schmidt R, Nordestgaard BG. Low-  
46  
47 578 density lipoprotein cholesterol and the risk of cancer: a mendelian randomization study. *J*  
48  
49 579 *Natl Cancer Inst* 2011; 103:508-19.  
50  
51  
52  
53  
54  
55  
56  
57

- 1  
2  
3 580 59. Plummer M, de Martel C, Vignat J, Ferlay J, Bray F, Franceschi S. Global burden of  
4  
5 581 cancers attributable to infections in 2012: a synthetic analysis. *Lancet Glob Health* 2016;  
6  
7 582 4:e609-16.  
8  
9  
10 583  
11  
12  
13  
14  
15  
16  
17  
18  
19  
20  
21  
22  
23  
24  
25  
26  
27  
28  
29  
30  
31  
32  
33  
34  
35  
36  
37  
38  
39  
40  
41  
42  
43  
44  
45  
46  
47  
48  
49  
50  
51  
52  
53  
54  
55  
56  
57



584 **Table 1. ASCVD 10-Year Risk Calculations for Primary Prevention\* by Age, Race, and Sex**

| Age | White Male |               | Black (AA) Male |               | White Female |               | Black (AA) Female |               |
|-----|------------|---------------|-----------------|---------------|--------------|---------------|-------------------|---------------|
|     | 10-yr risk | Risk Category | 10-yr risk      | Risk Category | 10-yr risk   | Risk Category | 10-yr risk        | Risk Category |
| 50  | 3.5%       | Low           | 5.2%            | Borderline    | 1.4%         | Low           | 2.2%              | Low           |
| 51  | 3.8%       | Low           | 5.4%            | Borderline    | 1.5%         | Low           | 2.4%              | Low           |
| 52  | 4.2%       | Low           | 5.7%            | Borderline    | 1.7%         | Low           | 2.6%              | Low           |
| 53  | 4.6%       | Low           | 6.0%            | Borderline    | 1.8%         | Low           | 2.9%              | Low           |
| 54  | 5.1%       | Borderline    | 6.2%            | Borderline    | 2.0%         | Low           | 3.1%              | Low           |
| 55  | 5.6%       | Borderline    | 6.5%            | Borderline    | 2.2%         | Low           | 3.4%              | Low           |
| 56  | 6.1%       | Borderline    | 6.8%            | Borderline    | 2.4%         | Low           | 3.7%              | Low           |
| 57  | 6.6%       | Borderline    | 7.1%            | Borderline    | 2.6%         | Low           | 4.0%              | Low           |
| 58  | 7.2%       | Borderline    | 7.4%            | Borderline    | 2.9%         | Low           | 4.4%              | Low           |
| 59  | 7.9%       | Intermediate  | 7.7%            | Intermediate  | 3.1%         | Low           | 4.7%              | Low           |
| 60  | 8.5%       | Intermediate  | 8.0%            | Intermediate  | 3.5%         | Low           | 5.1%              | Borderline    |
| 61  | 9.2%       | Intermediate  | 8.3%            | Intermediate  | 3.8%         | Low           | 5.5%              | Borderline    |
| 62  | 10.0%      | Intermediate  | 8.7%            | Intermediate  | 4.2%         | Low           | 6.0%              | Borderline    |
| 63  | 10.8%      | Intermediate  | 9.0%            | Intermediate  | 4.6%         | Low           | 6.4%              | Borderline    |
| 64  | 11.7%      | Intermediate  | 9.3%            | Intermediate  | 5.1%         | Borderline    | 6.9%              | Borderline    |
| 65  | 12.5%      | Intermediate  | 9.7%            | Intermediate  | 5.6%         | Borderline    | 7.4%              | Borderline    |
| 66  | 13.5%      | Intermediate  | 10.0%           | Intermediate  | 6.2%         | Borderline    | 8.0%              | Intermediate  |
| 67  | 14.5%      | Intermediate  | 10.4%           | Intermediate  | 6.9%         | Borderline    | 8.5%              | Intermediate  |
| 68  | 15.5%      | Intermediate  | 10.7%           | Intermediate  | 7.6%         | Intermediate  | 9.1%              | Intermediate  |
| 69  | 16.6%      | Intermediate  | 11.1%           | Intermediate  | 8.4%         | Intermediate  | 9.7%              | Intermediate  |
| 70  | 17.8%      | Intermediate  | 11.5%           | Intermediate  | 9.3%         | Intermediate  | 10.4%             | Intermediate  |
| 71  | 19.0%      | Intermediate  | 11.9%           | Intermediate  | 10.3%        | Intermediate  | 11.1%             | Intermediate  |
| 72  | 20.2%      | High          | 12.3%           | Intermediate  | 11.3%        | Intermediate  | 11.8%             | Intermediate  |
| 73  | 21.5%      | High          | 12.7%           | Intermediate  | 12.5%        | Intermediate  | 12.5%             | Intermediate  |
| 74  | 22.9%      | High          | 13.1%           | Intermediate  | 13.8%        | Intermediate  | 13.3%             | Intermediate  |
| 75  | 24.3%      | High          | 13.5%           | Intermediate  | 15.3%        | Intermediate  | 14.1%             | Intermediate  |
| 76  | 25.7%      | High          | 13.9%           | Intermediate  | 16.8%        | Intermediate  | 15.0%             | Intermediate  |
| 77  | 27.3%      | High          | 14.3%           | Intermediate  | 18.5%        | Intermediate  | 15.9%             | Intermediate  |
| 78  | 28.8%      | High          | 14.7%           | Intermediate  | 20.4%        | High          | 16.8%             | Intermediate  |
| 79  | 30.4%      | High          | 15.2%           | Intermediate  | 22.5%        | High          | 17.7%             | Intermediate  |

585  
586 \*Defined as non-diabetic persons with approximate guideline-driven “normal” values for total cholesterol  
587 (190 mg/dL), LDL cholesterol (125 mg/dL), HDL cholesterol (45 mg/dL for males, 55 mg/dL for  
588 females), systolic blood pressure (125 mmHg), diastolic blood pressure (75 mmHg), no history of  
589 smoking, not on anti-hypertensive medications, not on statin therapy, not on aspirin therapy.

590  
591 <https://tools.acc.org/ascvd-risk-estimator-plus/#!/calculate/estimate/>  
592

593 **Table 2. Baseline Characteristics of Study Population by Baseline LDL Cholesterol Value**

594

| Characteristic                                           | Baseline LDL Cholesterol Value (mg/dL) |                        |                          |                          |                          |                            |
|----------------------------------------------------------|----------------------------------------|------------------------|--------------------------|--------------------------|--------------------------|----------------------------|
|                                                          | 30 to 79<br>(n=16,162)                 | 80 to 99<br>(n=32,517) | 100 to 129<br>(n=69,399) | 130 to 159<br>(n=43,333) | 160 to 189<br>(n=12,663) | 190 or higher<br>(n=3,586) |
| Age, mean, median                                        | 61.7, 59                               | 61.4, 59               | 61.1, 59                 | 60.7, 59                 | 60.7, 59                 | 61.4, 60                   |
| Age, n, (%)                                              |                                        |                        |                          |                          |                          |                            |
| 50 to 59                                                 | 8167, (50.5)                           | 16551, (50.9)          | 35706, (51.5)            | 22811, (52.6)            | 6694, (52.9)             | 1765, (49.2)               |
| 60 to 69                                                 | 4686, (29.0)                           | 9742, (30.0)           | 21632, (31.2)            | 13797, (31.8)            | 4029, (31.8)             | 1162, (32.4)               |
| 70 to 79                                                 | 2221, (13.7)                           | 4399, (13.5)           | 8808, (12.7)             | 5103, (11.8)             | 1439, (11.4)             | 514, (13.3)                |
| 80 and older                                             | 1088, (6.7)                            | 1825, (5.6)            | 3253, (4.7)              | 1622, (3.7)              | 501, (4.0)               | 145, (4.0)                 |
| Sex                                                      |                                        |                        |                          |                          |                          |                            |
| Female                                                   | 9027, (55.9)                           | 18965, (58.3)          | 42697, (61.5)            | 28034, (64.7)            | 8654, (68.3)             | 2562, (71.4)               |
| Male                                                     | 7135, (44.1)                           | 13552, (41.7)          | 26702, (38.5)            | 15299, (35.3)            | 4009, (31.7)             | 1024, (28.6)               |
| Race                                                     |                                        |                        |                          |                          |                          |                            |
| Black                                                    | 1700, (10.5)                           | 2350, (7.2)            | 3855, (5.6)              | 2076, (4.8)              | 607, (4.8)               | 208, (5.8)                 |
| White                                                    | 14462, (89.5)                          | 30167, (92.8)          | 65544, (94.4)            | 41257, (95.2)            | 12056, (95.2)            | 3378, (94.2)               |
| Former smoker, n, (%)                                    | 4172, (27.3)                           | 8270, (26.9)           | 16871, (25.7)            | 10354, (25.3)            | 2933, (24.5)             | 858, (25.5)                |
| Current smoker, n, (%)                                   | 3287, (21.5)                           | 5430, (17.6)           | 9822, (15.0)             | 6274, (15.3)             | 1998, (16.7)             | 668, (19.8)                |
| Body mass index, mean, median                            | 28.4, 26                               | 28.7, 26               | 28.8, 27                 | 28.8, 27                 | 28.8, 27                 | 28.6, 27                   |
| History of obesity, n, (%)                               | 6011, (37.2)                           | 12438, (38.3)          | 26946, (38.8)            | 16949, (39.1)            | 4899, (38.7)             | 1326, (37.0)               |
| History of obstructive sleep apnea, n, (%)               | 932, (5.8)                             | 1831, (5.6)            | 3619, (5.2)              | 1931, (4.5)              | 507, (4.0)               | 136, (3.8)                 |
| History of hypertension, n, (%)                          | 5540, (34.3)                           | 11331, (34.8)          | 23634, (34.1)            | 13435, (31.0)            | 3621, (28.6)             | 1060, (29.6)               |
| History of atrial fibrillation, n, (%)                   | 687, (4.3)                             | 1181, (3.6)            | 1930, (2.8)              | 845, (2.0)               | 214, (1.7)               | 60, (1.7)                  |
| History of arrhythmia, n, (%)                            | 1178, (7.3)                            | 2254, (6.9)            | 4143, (6.0)              | 2054, (4.7)              | 528, (4.2)               | 133, (3.7)                 |
| History of valvular heart disease, n, (%)                | 431, (2.7)                             | 834, (2.6)             | 1505, (2.2)              | 798, (1.8)               | 246, (1.9)               | 60, (1.7)                  |
| History of congestive heart failure, n, (%)              | 251, (1.6)                             | 375, (1.2)             | 597, (0.9)               | 245, (0.6)               | 80, (0.6)                | 15, (0.4)                  |
| History of deep vein thrombosis, n, (%)                  | 184, (1.1)                             | 323, (1.0)             | 667, (1.0)               | 356, (0.8)               | 93, (0.8)                | 25, (0.7)                  |
| History of cancer, n, (%)                                | 1554, (9.6)                            | 2916, (9.0)            | 5597, (8.0)              | 3348, (7.7)              | 912, (7.2)               | 281, (7.8)                 |
| History of chronic obstructive pulmonary disease, n, (%) | 1147, (7.1)                            | 1783, (5.5)            | 3156, (4.5)              | 1666, (3.8)              | 474, (3.7)               | 146, (4.1)                 |
| History of chronic kidney disease, n, (%)                | 329, (2.0)                             | 424, (1.3)             | 695, (1.0)               | 356, (0.8)               | 126, (1.0)               | 42, (1.2)                  |
| History of depression, n, (%)                            | 1985, (12.3)                           | 3981, (12.2)           | 8327, (12.0)             | 5214, (12.0)             | 1606, (12.7)             | 440, (12.3)                |
| Systolic BP (mmHg), mean, median                         | 128.8, 128                             | 128.7, 127             | 129.0, 128               | 129.3, 128               | 129.8, 128               | 131.6, 130                 |
| Diastolic BP (mmHg), mean, median                        | 77.5, 78                               | 77.8, 78               | 78.5, 80                 | 79.0, 80                 | 79.1, 80                 | 79.8, 80                   |
| HDL cholesterol (mg/dL), mean, median                    | 60.0, 57                               | 58.1, 56               | 57.4, 55                 | 56.9, 55                 | 56.2, 54                 | 55.4, 53                   |
| Total/HDL cholesterol, mean, median                      | 2.8, 3                                 | 3.2, 3                 | 3.6, 3                   | 4.2, 4                   | 4.8, 5                   | 5.7, 5                     |
| Triglycerides (mg/dL), mean, median                      | 112.8, 90                              | 109.0, 91              | 115.2, 100               | 125.0, 111               | 138.4, 125               | 166.6, 149                 |
| Hemoglobin (g/dL), mean, median                          | 13.6, 14                               | 13.8, 14               | 14.0, 14                 | 14.1, 14                 | 14.2, 14                 | 14.1, 14                   |
| Glucose (mg/dL), mean, median                            | 99.0, 94                               | 97.6, 94               | 97.2, 94                 | 96.9, 94                 | 98.1, 95                 | 100.4, 96                  |

|    |                                                               |              |               |               |               |              |             |
|----|---------------------------------------------------------------|--------------|---------------|---------------|---------------|--------------|-------------|
| 1  |                                                               |              |               |               |               |              |             |
| 2  |                                                               |              |               |               |               |              |             |
| 3  | ACE Inhibitor, n, (%)                                         | 2060, (12.7) | 3992, (12.3)  | 8024, (11.6)  | 4454, (10.3)  | 1205, (9.5)  | 328, (9.1)  |
| 4  | Angiotensin receptor blocker, n, (%)                          | 1028, (6.4)  | 2017, (6.2)   | 3927, (5.7)   | 2018, (4.7)   | 558, (4.4)   | 156, (4.4)  |
| 5  | Beta blocker, n, (%)                                          | 2747, (17.0) | 4827, (14.8)  | 8969, (12.9)  | 4709, (10.9)  | 1352, (10.7) | 430, (12.0) |
| 6  | Calcium blocker, n, (%)                                       | 1931, (11.9) | 3501, (10.8)  | 6612, (9.5)   | 3534, (8.2)   | 956, (7.5)   | 297, (8.3)  |
| 7  | Diuretic, n, (%)                                              | 2662, (16.5) | 4763, (14.6)  | 8814, (12.7)  | 4717, (10.9)  | 1257, (9.9)  | 390, (10.9) |
| 8  | Anti-depressant, n, (%)                                       | 3497, (21.6) | 6504, (20.0)  | 13784, (19.9) | 8624, (19.9)  | 2628, (20.8) | 797, (22.2) |
| 9  | Opioids, n, (%)                                               | 3319, (20.5) | 5400, (16.6)  | 9688, (14.0)  | 5711, (13.2)  | 1599, (12.6) | 523, (14.2) |
| 10 | Anti-platelet agent, n, (%)                                   | 2209, (13.7) | 4319, (13.3)  | 9006, (13.0)  | 5057, (11.7)  | 1267, (10.0) | 402, (11.2) |
| 11 | Aspirin, n, (%)                                               | 3082, (19.1) | 6087, (18.7)  | 12511, (18.0) | 7117, (16.4)  | 1922, (15.2) | 586, (16.3) |
| 12 | Direct oral anticoagulant, n, (%)                             | 423, (2.6)   | 684, (2.1)    | 1086, (1.6)   | 479, (1.1)    | 133, (1.1)   | 33, (0.9)   |
| 13 | ASCVD 10-year risk, mean, median                              | 10.0, 6      | 10.0, 6       | 9.6, 6        | 9.6, 6        | 10.1, 7      | 12.0, 9     |
| 14 | ASCVD 10-year risk, n, (%)                                    |              |               |               |               |              |             |
| 15 | Low                                                           | 6204, (58.8) | 12166, (58.3) | 25457, (58.6) | 15048, (57.3) | 4144, (54.1) | 900, (43.0) |
| 16 | Intermediate                                                  | 2887, (27.4) | 5804, (27.8)  | 12514, (28.8) | 8161, (31.1)  | 2596, (33.9) | 839, (40.0) |
| 17 | High                                                          | 1459, (13.8) | 2888, (13.8)  | 5472, (12.6)  | 3045, (11.6)  | 913, (11.9)  | 356, (17.0) |
| 18 | Started statin use >1 year after baseline measurement, n, (%) | 484, (3.0)   | 921, (2.8)    | 2948, (4.2)   | 3448, (8.0)   | 1600, (12.6) | 644, (18.0) |
| 19 |                                                               |              |               |               |               |              |             |
| 20 | 595                                                           |              |               |               |               |              |             |
| 21 |                                                               |              |               |               |               |              |             |
| 22 |                                                               |              |               |               |               |              |             |
| 23 |                                                               |              |               |               |               |              |             |
| 24 |                                                               |              |               |               |               |              |             |
| 25 |                                                               |              |               |               |               |              |             |
| 26 |                                                               |              |               |               |               |              |             |
| 27 |                                                               |              |               |               |               |              |             |
| 28 |                                                               |              |               |               |               |              |             |
| 29 |                                                               |              |               |               |               |              |             |
| 30 |                                                               |              |               |               |               |              |             |
| 31 |                                                               |              |               |               |               |              |             |
| 32 |                                                               |              |               |               |               |              |             |
| 33 |                                                               |              |               |               |               |              |             |
| 34 |                                                               |              |               |               |               |              |             |
| 35 |                                                               |              |               |               |               |              |             |
| 36 |                                                               |              |               |               |               |              |             |
| 37 |                                                               |              |               |               |               |              |             |
| 38 |                                                               |              |               |               |               |              |             |
| 39 |                                                               |              |               |               |               |              |             |
| 40 |                                                               |              |               |               |               |              |             |
| 41 |                                                               |              |               |               |               |              |             |
| 42 |                                                               |              |               |               |               |              |             |
| 43 |                                                               |              |               |               |               |              |             |
| 44 |                                                               |              |               |               |               |              |             |
| 45 |                                                               |              |               |               |               |              |             |
| 46 |                                                               |              |               |               |               |              |             |
| 47 |                                                               |              |               |               |               |              |             |

596 **Table 3. Risks and Hazard Ratios of Death by LDL Cholesterol Level at Baseline**

597

| LDL cholesterol (mg/dL)    | n     | Cumulative incidence (%) |        |         | Crude HR | Adj. HR Model 1 | Adj. HR Model 2 | 95% C.I.    |
|----------------------------|-------|--------------------------|--------|---------|----------|-----------------|-----------------|-------------|
|                            |       | 1-year                   | 5-year | 10-year |          |                 |                 |             |
| 30 to 79                   | 16162 | 2.7                      | 11.3   | 19.8    | 1.41     | 1.23            | 1.23            | 1.17 – 1.30 |
| 80 to 99                   | 32517 | 1.7                      | 8.1    | 14.7    | 1.0      | 1.0             | 1.0             | -----       |
| 100 to 129                 | 69399 | 1.1                      | 6.0    | 11.7    | 0.77     | 0.86            | 0.87            | 0.83 – 0.91 |
| 130 to 159                 | 43333 | 1.0                      | 5.2    | 10.7    | 0.69     | 0.85            | 0.88            | 0.84 – 0.93 |
| 160 to 189                 | 12663 | 1.2                      | 5.4    | 10.1    | 0.68     | 0.86            | 0.91            | 0.84 – 0.98 |
| 190 or higher              | 3586  | 1.8                      | 7.9    | 14.0    | 0.96     | 1.09            | 1.19            | 1.06 – 1.34 |
| <b>Patients aged 50-69</b> |       |                          |        |         |          |                 |                 |             |
| 30 to 79                   | 12853 | 1.8                      | 8.1    | 14.2    | 1.52     | 1.30            | 1.20            | 1.20 – 1.39 |
| 80 to 99                   | 26293 | 1.1                      | 5.2    | 9.6     | 1.0      | 1.0             | 1.0             | -----       |
| 100 to 129                 | 57338 | 0.7                      | 3.9    | 7.6     | 0.76     | 0.86            | 0.86            | 0.81 – 0.92 |
| 130 to 159                 | 36608 | 0.7                      | 3.4    | 6.9     | 0.69     | 0.82            | 0.85            | 0.79 – 0.91 |
| 160 to 189                 | 10723 | 0.9                      | 3.7    | 6.5     | 0.70     | 0.83            | 0.89            | 0.81 – 0.99 |
| 190 or higher              | 2927  | 1.2                      | 5.7    | 9.4     | 1.01     | 1.10            | 1.24            | 1.06 – 1.44 |
| <b>Patients aged 70-89</b> |       |                          |        |         |          |                 |                 |             |
| 30 to 79                   | 3309  | 6.3                      | 24.3   | 42.7    | 1.25     | 1.15            | 1.15            | 1.06 – 1.25 |
| 80 to 99                   | 6224  | 4.5                      | 20.5   | 37.2    | 1.0      | 1.0             | 1.0             | -----       |
| 100 to 129                 | 12061 | 2.7                      | 16.0   | 31.4    | 0.80     | 0.87            | 0.87            | 0.82 – 0.93 |
| 130 to 159                 | 6725  | 2.8                      | 15.3   | 30.8    | 0.76     | 0.89            | 0.91            | 0.84 – 0.98 |
| 160 to 189                 | 1940  | 2.9                      | 15.0   | 29.7    | 0.75     | 0.89            | 0.92            | 0.82 – 1.04 |
| 190 or higher              | 659   | 4.5                      | 17.5   | 34.2    | 0.90     | 1.08            | 1.15            | 0.96 – 1.37 |

598

599 **Model 1:** Adjusted for age, race, sex, BMI, current smoker, former smoker, history of the following in the past year: hypertension, atrial  
600 fibrillation, arrhythmia, congestive heart failure, cancer, chronic obstructive pulmonary disease, chronic kidney disease, baseline systolic and  
601 diastolic blood pressure, glucose, and the following medications in the past year: ACE Inhibitors, beta-blockers, calcium blockers, any SBP  
602 lowering medication, diuretics, aspirin, DOACS, anti-depressants, opioids.

603 **Model 2:** Adjusted for Model 1 covariates + statin initiation >1 year after baseline cholesterol measurement.

604

1  
2  
3  
4  
5  
6  
7  
8  
9  
10  
11  
12  
13  
14  
15  
16  
17  
18  
19  
20  
21  
22  
23  
24  
25  
26  
27  
28  
29  
30  
31  
32  
33  
34  
35  
36  
37  
38  
39  
40  
41  
42  
43  
44  
45  
46  
47  
48  
49  
50  
51  
52  
53  
54  
55  
56  
57  
58  
59  
60

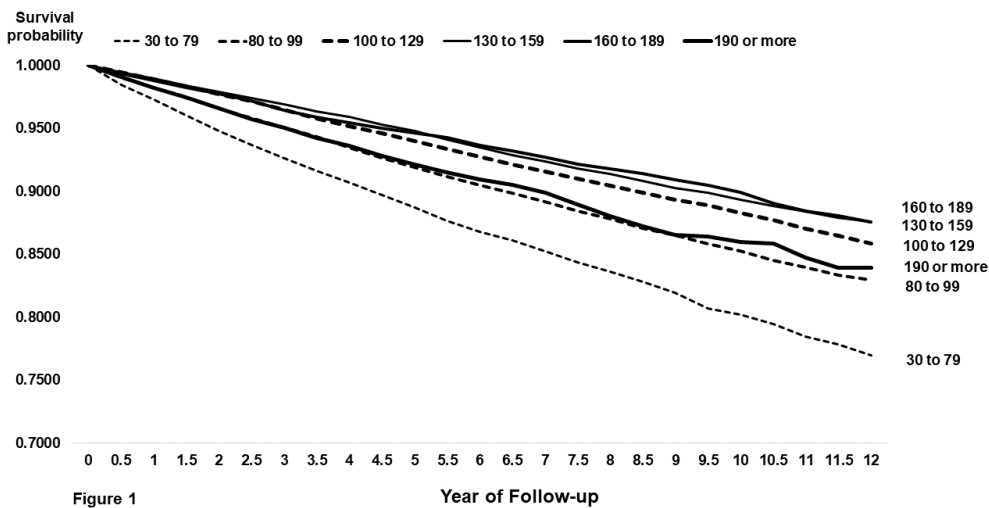

Figure 1. Plot of cumulative mortality rates in 6-month intervals over 12 years of follow-up by baseline LDL-C category. Dashed lines depict the 3 lowest LDL-C categories (30-79, 80-99, 100-129 mg/dL) and solid lines depict the highest LDL-C categories (130-159, 160-189, >=190 mg/dL).

855x481mm (38 x 38 DPI)

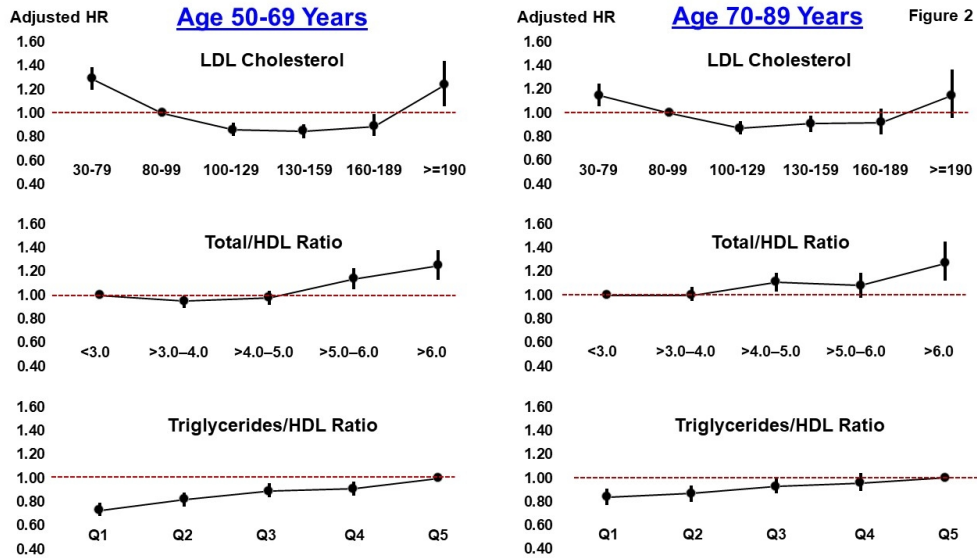

Figure 2. Plot of mortality hazard ratios (HR, filled circles) and 95% confidence intervals (vertical lines) across categories of LDL cholesterol (top), total cholesterol to HDL cholesterol ratio (middle), and triglycerides to HDL cholesterol ratio (bottom). The left side of the graph is for patients aged 50-69 years; the right side is for patients aged 70-89 years. The dashed line reflects the referent group null value (1.0) for the HR. Q: quintile.

338x190mm (96 x 96 DPI)

**Supplement Table 1. Maximum/Range of Total Cholesterol (T-C) Values Along with T-C to HDL-C Cholesterol Ratios for Different Life Insurance Underwriting Categories**

| Age Category   | Life Insurance Underwriting Category |                                     |                                             |                                      |
|----------------|--------------------------------------|-------------------------------------|---------------------------------------------|--------------------------------------|
|                | Elite Plus*<br>(ages 18-75)          | Preferred Plus*<br>(ages 18-75)     | Standard Plus<br>(ages 18-75)               | Standard<br>(all ages)               |
| 54 and younger | 220/4.5                              | 240/5.0                             | 260/6.0 or 280/5.5<br>280/6.5 or 300/6.0    | -----                                |
| 55 to 69       | 230/4.5                              | 260/5.5 or 280/5.0                  | 150 to 300/7.0 or<br>150 to 310/6.5         | -----                                |
| 70 and older   | 150 to 240/5.0                       | 150 to 280/5.5 or<br>150 to 300/5.0 | Current medication<br>acceptable (all ages) | -----                                |
| 0 to 44        | -----                                | -----                               | -----                                       | ≤300/9.6 or<br>>300/8.0              |
| 45 to 65       | -----                                | -----                               | -----                                       | ≤350/9.6 or<br>351 to 400/8.0        |
| 66 and older   | -----                                | -----                               | -----                                       | 150 to 350/10.5 or<br>351 to 375/9.6 |

\*Current medication OK if acceptable level maintained for at least 12 months (all ages)

Source: [http://www.cassaniinsurance.com/wp-content/uploads/2018/02/Met-Life-condensed\\_uw\\_guide.pdf](http://www.cassaniinsurance.com/wp-content/uploads/2018/02/Met-Life-condensed_uw_guide.pdf)

**Supplement Table 2. Risks and Hazard Ratios of Death by LDL Cholesterol Levels at Baseline Stratified by Sex at Baseline**

| LDL Cholesterol (mg/dL) | n     | Cumulative incidence (%) |        |         | Crude HR | Adj. HR Model | 95% C.I.    |
|-------------------------|-------|--------------------------|--------|---------|----------|---------------|-------------|
|                         |       | 1-year                   | 5-year | 10-year |          |               |             |
| <b>Female</b>           |       |                          |        |         |          |               |             |
| 30 to 79                | 9027  | 2.3                      | 9.4    | 17.1    | 1.42     | 1.23          | 1.14 – 1.33 |
| 80 to 99                | 18965 | 1.4                      | 6.7    | 12.3    | 1.0      | 1.0           | -----       |
| 100 to 129              | 42697 | 0.8                      | 5.2    | 10.5    | 0.82     | 0.88          | 0.83 – 0.94 |
| 130 to 159              | 28034 | 0.9                      | 4.8    | 10.2    | 0.78     | 0.89          | 0.83 – 0.95 |
| 160 to 189              | 8654  | 1.1                      | 5.2    | 9.7     | 0.80     | 0.91          | 0.82 – 1.00 |
| 190 or higher           | 2562  | 1.8                      | 7.8    | 14.6    | 1.20     | 1.24          | 1.08 – 1.42 |
| <b>Male</b>             |       |                          |        |         |          |               |             |
| 30 to 79                | 7135  | 3.3                      | 13.7   | 23.4    | 1.37     | 1.22          | 1.13 – 1.32 |
| 80 to 99                | 13552 | 2.2                      | 10.0   | 18.4    | 1.0      | 1.0           | -----       |
| 100 to 129              | 26702 | 1.5                      | 7.2    | 13.8    | 0.73     | 0.86          | 0.80 – 0.91 |
| 130 to 159              | 15299 | 1.3                      | 6.0    | 11.5    | 0.61     | 0.85          | 0.79 – 0.92 |
| 160 to 189              | 4009  | 1.4                      | 5.6    | 10.8    | 0.58     | 0.90          | 0.79 – 1.02 |
| 190 or higher           | 1024  | 1.8                      | 8.1    | 12.2    | 0.72     | 1.06          | 0.85 – 1.32 |

**Model:** Adjusted for race, BMI, current smoker, former smoker, history of the following in the past year: hypertension, atrial fibrillation, arrhythmia, congestive heart failure, cancer, chronic obstructive pulmonary disease, chronic kidney disease, baseline systolic and diastolic blood pressure, glucose, and the following medications in the past year: ACE Inhibitors, beta-blockers, calcium blockers, any SBP lowering medication, diuretics, aspirin, DOACS, anti-depressants, opioids, and statin initiation >1 year after baseline cholesterol measurement.



**Supplement Table 3. Risks and Hazard Ratios of Death by LDL Cholesterol Levels at Baseline Stratified by ASCVD Risk Classification**

| LDL cholesterol (mg/dL)          | n     | Cumulative incidence (%) |        |         | Crude HR | Adj. HR Model | 95% C.I.    |
|----------------------------------|-------|--------------------------|--------|---------|----------|---------------|-------------|
|                                  |       | 1-year                   | 5-year | 10-year |          |               |             |
| <b>Low or Borderline Risk</b>    |       |                          |        |         |          |               |             |
| 30 to 79                         | 6204  | 1.5                      | 6.7    | 12.2    | 1.66     | 1.51          | 1.34 – 1.70 |
| 80 to 99                         | 12166 | 1.0                      | 4.2    | 7.2     | 1.0      | 1.0           | -----       |
| 100 to 129                       | 25457 | 0.6                      | 2.9    | 5.6     | 0.73     | 0.78          | 0.70 – 0.86 |
| 130 to 159                       | 15048 | 0.5                      | 2.5    | 5.2     | 0.66     | 0.75          | 0.66 – 0.84 |
| 160 to 189                       | 4144  | 0.6                      | 2.7    | 4.7     | 0.65     | 0.75          | 0.62 – 0.91 |
| 190 or higher                    | 900   | 0.6                      | 4.3    | 7.7     | 1.05     | 1.18          | 0.86 – 1.61 |
| <b>Intermediate Risk</b>         |       |                          |        |         |          |               |             |
| 30 to 79                         | 2887  | 3.5                      | 15.6   | 27.1    | 1.38     | 1.25          | 1.11 – 1.40 |
| 80 to 99                         | 5804  | 2.6                      | 11.4   | 21.3    | 1.0      | 1.0           | -----       |
| 100 to 129                       | 12514 | 1.6                      | 8.4    | 16.6    | 0.75     | 0.80          | 0.73 – 0.87 |
| 130 to 159                       | 8161  | 1.4                      | 7.0    | 13.8    | 0.61     | 0.69          | 0.62 – 0.77 |
| 160 to 189                       | 2596  | 1.5                      | 7.0    | 12.2    | 0.58     | 0.68          | 0.58 – 0.79 |
| 190 or higher                    | 839   | 2.6                      | 9.6    | 14.8    | 0.77     | 0.89          | 0.70 – 1.13 |
| <b>High Risk</b>                 |       |                          |        |         |          |               |             |
| 30 to 79                         | 1459  | 7.9                      | 28.0   | 49.9    | 1.25     | 1.17          | 1.04 – 1.32 |
| 80 to 99                         | 2888  | 5.4                      | 23.6   | 43.3    | 1.0      | 1.0           | -----       |
| 100 to 129                       | 5472  | 3.4                      | 19.3   | 36.6    | 0.82     | 0.85          | 0.77 – 0.92 |
| 130 to 159                       | 3045  | 3.8                      | 17.6   | 33.5    | 0.73     | 0.78          | 0.70 – 0.87 |
| 160 to 189                       | 913   | 3.9                      | 17.9   | 32.3    | 0.75     | 0.82          | 0.70 – 0.97 |
| 190 or higher                    | 356   | 4.1                      | 15.7   | 34.2    | 0.71     | 0.81          | 0.63 – 1.04 |
| <b>ASCVD Risk Not Determined</b> |       |                          |        |         |          |               |             |
| 30 to 79                         | 5612  | 2.3                      | 10.1   | 18.0    | 1.45     | 1.34          | 1.22 – 1.48 |
| 80 to 99                         | 11659 | 1.3                      | 6.9    | 13.0    | 1.0      | 1.0           | -----       |
| 100 to 129                       | 25956 | 0.8                      | 5.2    | 10.6    | 0.80     | 0.85          | 0.79 – 0.91 |
| 130 to 159                       | 17079 | 0.8                      | 4.6    | 10.1    | 0.74     | 0.85          | 0.78 – 0.92 |
| 160 to 189                       | 5010  | 1.0                      | 4.5    | 9.5     | 0.72     | 0.85          | 0.75 – 0.96 |
| 190 or higher                    | 1491  | 1.5                      | 7.3    | 12.6    | 0.98     | 1.17          | 0.97 – 1.41 |

**Model:** Adjusted for BMI, history of the following in the past year: atrial fibrillation, arrhythmia, congestive heart failure, cancer, chronic obstructive pulmonary disease, chronic kidney disease, glucose, and the following medications in the past year: aspirin, DOACS, anti-depressants, opioids, and statin initiation >1 year after baseline cholesterol measurement.

**Supplement Table 4. Risks and Hazard Ratios of Death by Total Cholesterol to HDL Cholesterol Ratio at Baseline**

| Total/HDL Cholesterol Ratio | n     | Cumulative incidence (%) |        |         | Crude HR | Adj. HR Model | 95% C.I.    |
|-----------------------------|-------|--------------------------|--------|---------|----------|---------------|-------------|
|                             |       | 1-year                   | 5-year | 10-year |          |               |             |
| 3.0 or lower                | 52405 | 1.4                      | 6.6    | 12.3    | 1.0      | 1.0           | -----       |
| > 3.0 to 4.0                | 63482 | 1.2                      | 6.3    | 12.3    | 0.98     | 0.98          | 0.94 – 1.02 |
| > 4.0 to 5.0                | 37907 | 1.4                      | 6.7    | 12.8    | 1.04     | 1.04          | 0.99 – 1.09 |
| > 5.0 to 6.0                | 16053 | 1.5                      | 7.2    | 14.1    | 1.15     | 1.12          | 1.06 – 1.19 |
| > 6.0                       | 7813  | 2.1                      | 9.2    | 15.2    | 1.32     | 1.28          | 1.18 – 1.38 |
| <b>Patients aged 50-69</b>  |       |                          |        |         |          |               |             |
| 3.0 or lower                | 42650 | 0.9                      | 4.3    | 7.8     | 1.0      | 1.0           | -----       |
| > 3.0 to 4.0                | 51918 | 0.8                      | 4.0    | 7.8     | 0.99     | 0.95          | 0.89 – 1.00 |
| > 4.0 to 5.0                | 31713 | 1.0                      | 4.4    | 8.5     | 1.10     | 0.98          | 0.92 – 1.04 |
| > 5.0 to 6.0                | 13706 | 1.1                      | 5.4    | 10.3    | 1.34     | 1.14          | 1.05 – 1.23 |
| > 6.0                       | 6755  | 1.7                      | 6.8    | 11.7    | 1.60     | 1.25          | 1.13 – 1.38 |
| <b>Patients aged 70-89</b>  |       |                          |        |         |          |               |             |
| 3.0 or lower                | 9755  | 3.5                      | 17.3   | 32.9    | 1.0      | 1.0           | -----       |
| > 3.0 to 4.0                | 11564 | 3.1                      | 16.9   | 32.4    | 0.97     | 1.00          | 0.95 – 1.07 |
| > 4.0 to 5.0                | 6194  | 3.7                      | 18.5   | 35.2    | 1.08     | 1.11          | 1.03 – 1.19 |
| > 5.0 to 6.0                | 2347  | 4.0                      | 17.8   | 35.7    | 1.10     | 1.08          | 0.98 – 1.19 |
| > 6.0                       | 1058  | 4.8                      | 24.4   | 38.4    | 1.30     | 1.27          | 1.12 – 1.45 |

**Model:** Adjusted for race, sex, BMI, current smoker, former smoker, history of the following in the past year: hypertension, atrial fibrillation, arrhythmia, congestive heart failure, cancer, chronic obstructive pulmonary disease, chronic kidney disease, baseline systolic and diastolic blood pressure, glucose, and the following medications in the past year: ACE Inhibitors, beta-blockers, calcium blockers, any SBP lowering medication, diuretics, aspirin, DOACS, anti-depressants, opioids, and statin initiation >1 year after baseline cholesterol measurement.

Supplement Table 5. Risks and Hazard Ratios of Death by Triglycerides to HDL-C Ratio at Baseline

| Triglycerides/<br>HDL-C Ratio | n     | Cumulative incidence (%) |        |         | Crude<br>HR | Adj. HR<br>Model | 95%<br>C.I. |
|-------------------------------|-------|--------------------------|--------|---------|-------------|------------------|-------------|
|                               |       | 1-year                   | 5-year | 10-year |             |                  |             |
| Quintile 1                    | 35533 | 0.9                      | 5.1    | 9.7     | 0.63        | 0.76             | 0.72 – 0.81 |
| Quintile 2                    | 35403 | 1.2                      | 6.2    | 11.9    | 0.77        | 0.84             | 0.80 – 0.88 |
| Quintile 3                    | 35523 | 1.4                      | 6.9    | 13.1    | 0.86        | 0.89             | 0.85 – 0.94 |
| Quintile 4                    | 35479 | 1.5                      | 7.2    | 13.9    | 0.91        | 0.92             | 0.88 – 0.97 |
| Quintile 5                    | 35513 | 1.7                      | 7.9    | 15.1    | 1.0         | 1.0              | -----       |
| <b>Patients aged 50-69</b>    |       |                          |        |         |             |                  |             |
| Quintile 1                    | 29314 | 0.6                      | 3.1    | 5.9     | 0.53        | 0.73             | 0.68 – 0.79 |
| Quintile 2                    | 29313 | 0.8                      | 3.9    | 7.3     | 0.66        | 0.82             | 0.76 – 0.88 |
| Quintile 3                    | 29213 | 0.9                      | 4.4    | 8.5     | 0.76        | 0.89             | 0.84 – 0.96 |
| Quintile 4                    | 29425 | 1.0                      | 4.7    | 9.3     | 0.83        | 0.91             | 0.85 – 0.97 |
| Quintile 5                    | 29302 | 1.3                      | 5.8    | 10.8    | 1.0         | 1.0              | -----       |
| <b>Patients aged 70-89</b>    |       |                          |        |         |             |                  |             |
| Quintile 1                    | 6169  | 2.8                      | 15.9   | 30.7    | 0.80        | 0.84             | 0.77 – 0.91 |
| Quintile 2                    | 6180  | 3.2                      | 16.4   | 31.9    | 0.83        | 0.87             | 0.80 – 0.94 |
| Quintile 3                    | 6176  | 3.7                      | 17.9   | 33.6    | 0.91        | 0.93             | 0.87 – 1.01 |
| Quintile 4                    | 6180  | 3.7                      | 18.5   | 34.6    | 0.93        | 0.96             | 0.89 – 1.04 |
| Quintile 5                    | 6179  | 4.1                      | 19.4   | 37.0    | 1.0         | 1.0              | -----       |

**Model:** Adjusted for race, sex, BMI, current smoker, former smoker, history of the following in the past year: hypertension, atrial fibrillation, arrhythmia, congestive heart failure, cancer, chronic obstructive pulmonary disease, chronic kidney disease, baseline systolic and diastolic blood pressure, glucose, and the following medications in the past year: ACE Inhibitors, beta-blockers, calcium blockers, any SBP lowering medication, diuretics, aspirin, DOACS, anti-depressants, opioids, and statin initiation >1 year after baseline cholesterol measurement.

1  
2  
3  
4  
5  
6  
7  
8  
9  
10  
11  
12  
13  
14  
15  
16  
17  
18  
19  
20  
21  
22  
23  
24  
25  
26  
27  
28  
29  
30  
31  
32  
33  
34  
35  
36  
37  
38  
39  
40  
41  
42  
43  
44  
45  
46

**APPENDIX – STROBE 2007 (v4) Statement—Checklist of items that should be included in reports of cohort studies**

| Section/Topic                | Item # | Recommendation                                                                                                                                                                       | Reported on page # |
|------------------------------|--------|--------------------------------------------------------------------------------------------------------------------------------------------------------------------------------------|--------------------|
| Title and abstract           | 1      | (a) Indicate the study's design with a commonly used term in the title or the abstract                                                                                               | 1                  |
|                              |        | (b) Provide in the abstract an informative and balanced summary of what was done and what was found                                                                                  | 2-3                |
| <b>Introduction</b>          |        |                                                                                                                                                                                      |                    |
| Background/rationale         | 2      | Explain the scientific background and rationale for the investigation being reported                                                                                                 | 5-7                |
| Objectives                   | 3      | State specific objectives, including any prespecified hypotheses                                                                                                                     | 7                  |
| <b>Methods</b>               |        |                                                                                                                                                                                      |                    |
| Study design                 | 4      | Present key elements of study design early in the paper                                                                                                                              | 8-10               |
| Setting                      | 5      | Describe the setting, locations, and relevant dates, including periods of recruitment, exposure, follow-up, and data collection                                                      | 8-10               |
| Participants                 | 6      | (a) Give the eligibility criteria, and the sources and methods of selection of participants. Describe methods of follow-up                                                           | 8-10               |
|                              |        | (b) For matched studies, give matching criteria and number of exposed and unexposed                                                                                                  | N/A                |
| Variables                    | 7      | Clearly define all outcomes, exposures, predictors, potential confounders, and effect modifiers. Give diagnostic criteria, if applicable                                             | 9-10               |
| Data sources/<br>measurement | 8*     | For each variable of interest, give sources of data and details of methods of assessment (measurement). Describe comparability of assessment methods if there is more than one group | 9-10               |
| Bias                         | 9      | Describe any efforts to address potential sources of bias                                                                                                                            | 9-10               |
| Study size                   | 10     | Explain how the study size was arrived at                                                                                                                                            | 8                  |
| Quantitative variables       | 11     | Explain how quantitative variables were handled in the analyses. If applicable, describe which groupings were chosen and why                                                         | 9-10               |
| Statistical methods          | 12     | (a) Describe all statistical methods, including those used to control for confounding                                                                                                | 10                 |
|                              |        | (b) Describe any methods used to examine subgroups and interactions                                                                                                                  | 10                 |
|                              |        | (c) Explain how missing data were addressed                                                                                                                                          | 8-9                |
|                              |        | (d) If applicable, explain how loss to follow-up was addressed                                                                                                                       | N/A                |
|                              |        | (e) Describe any sensitivity analyses                                                                                                                                                | N/A                |
| <b>Results</b>               |        |                                                                                                                                                                                      |                    |

|                          |     |                                                                                                                                                                                                              |       |
|--------------------------|-----|--------------------------------------------------------------------------------------------------------------------------------------------------------------------------------------------------------------|-------|
| Participants             | 13* | (a) Report numbers of individuals at each stage of study—eg numbers potentially eligible, examined for eligibility, confirmed eligible, included in the study, completing follow-up, and analysed            | 10-11 |
|                          |     | (b) Give reasons for non-participation at each stage                                                                                                                                                         | N/A   |
|                          |     | (c) Consider use of a flow diagram                                                                                                                                                                           | N/A   |
| Descriptive data         | 14* | (a) Give characteristics of study participants (eg demographic, clinical, social) and information on exposures and potential confounders                                                                     | 10-11 |
|                          |     | (b) Indicate number of participants with missing data for each variable of interest                                                                                                                          | N/A   |
|                          |     | (c) Summarise follow-up time (eg, average and total amount)                                                                                                                                                  | 11    |
| Outcome data             | 15* | Report numbers of outcome events or summary measures over time                                                                                                                                               | 11    |
| Main results             | 16  | (a) Give unadjusted estimates and, if applicable, confounder-adjusted estimates and their precision (eg, 95% confidence interval). Make clear which confounders were adjusted for and why they were included | 11-12 |
|                          |     | (b) Report category boundaries when continuous variables were categorized                                                                                                                                    | 9     |
|                          |     | (c) If relevant, consider translating estimates of relative risk into absolute risk for a meaningful time period                                                                                             | N/A   |
| Other analyses           | 17  | Report other analyses done—eg analyses of subgroups and interactions, and sensitivity analyses                                                                                                               | 11-12 |
| <b>Discussion</b>        |     |                                                                                                                                                                                                              |       |
| Key results              | 18  | Summarise key results with reference to study objectives                                                                                                                                                     | 13    |
| <b>Limitations</b>       |     |                                                                                                                                                                                                              |       |
| Interpretation           | 20  | Give a cautious overall interpretation of results considering objectives, limitations, multiplicity of analyses, results from similar studies, and other relevant evidence                                   | 13-17 |
| Generalisability         | 21  | Discuss the generalisability (external validity) of the study results                                                                                                                                        | 16    |
| <b>Other information</b> |     |                                                                                                                                                                                                              |       |
| Funding                  | 22  | Give the source of funding and the role of the funders for the present study and, if applicable, for the original study on which the present article is based                                                | N/A   |

\*Give information separately for cases and controls in case-control studies and, if applicable, for exposed and unexposed groups in cohort and cross-sectional studies.

**Note:** An Explanation and Elaboration article discusses each checklist item and gives methodological background and published examples of transparent reporting. The STROBE checklist is best used in conjunction with this article (freely available on the Web sites of PLoS Medicine at <http://www.plosmedicine.org/>, Annals of Internal Medicine at <http://www.annals.org/>, and Epidemiology at <http://www.epidem.com/>). Information on the STROBE Initiative is available at [www.strobe-statement.org](http://www.strobe-statement.org).

# BMJ Open

## Is LDL cholesterol associated with long-term mortality among primary prevention adults? A retrospective cohort study from a large healthcare system

|                                 |                                                                                                                                                                                                                                                                                           |
|---------------------------------|-------------------------------------------------------------------------------------------------------------------------------------------------------------------------------------------------------------------------------------------------------------------------------------------|
| Journal:                        | <i>BMJ Open</i>                                                                                                                                                                                                                                                                           |
| Manuscript ID                   | bmjopen-2023-077949.R1                                                                                                                                                                                                                                                                    |
| Article Type:                   | Original research                                                                                                                                                                                                                                                                         |
| Date Submitted by the Author:   | 07-Mar-2024                                                                                                                                                                                                                                                                               |
| Complete List of Authors:       | Kip, Kevin; University of Pittsburgh Medical Center Health System, Clinical Analytics<br>Diamond, David; University of South Florida, Department of Psychology<br>Mulukutla, Suresh; University of Pittsburgh, Heart and Vascular Institute<br>Marroquin, Oscar; UPMC, Clinical Analytics |
| <b>Primary Subject Heading</b>: | Cardiovascular medicine                                                                                                                                                                                                                                                                   |
| Secondary Subject Heading:      | Epidemiology, Public health                                                                                                                                                                                                                                                               |
| Keywords:                       | EPIDEMIOLOGY, Primary Prevention, Adult cardiology < CARDIOLOGY                                                                                                                                                                                                                           |
|                                 |                                                                                                                                                                                                                                                                                           |

SCHOLARONE™  
Manuscripts



I, the Submitting Author has the right to grant and does grant on behalf of all authors of the Work (as defined in the below author licence), an exclusive licence and/or a non-exclusive licence for contributions from authors who are: i) UK Crown employees; ii) where BMJ has agreed a CC-BY licence shall apply, and/or iii) in accordance with the terms applicable for US Federal Government officers or employees acting as part of their official duties; on a worldwide, perpetual, irrevocable, royalty-free basis to BMJ Publishing Group Ltd ("BMJ") its licensees and where the relevant Journal is co-owned by BMJ to the co-owners of the Journal, to publish the Work in this journal and any other BMJ products and to exploit all rights, as set out in our [licence](#).

The Submitting Author accepts and understands that any supply made under these terms is made by BMJ to the Submitting Author unless you are acting as an employee on behalf of your employer or a postgraduate student of an affiliated institution which is paying any applicable article publishing charge ("APC") for Open Access articles. Where the Submitting Author wishes to make the Work available on an Open Access basis (and intends to pay the relevant APC), the terms of reuse of such Open Access shall be governed by a Creative Commons licence – details of these licences and which [Creative Commons](#) licence will apply to this Work are set out in our licence referred to above.

Other than as permitted in any relevant BMJ Author's Self Archiving Policies, I confirm this Work has not been accepted for publication elsewhere, is not being considered for publication elsewhere and does not duplicate material already published. I confirm all authors consent to publication of this Work and authorise the granting of this licence.

1  
2  
3 1 **Is LDL cholesterol associated with long-term mortality among primary prevention adults?**

4  
5 2 **A retrospective cohort study from a large healthcare system**

6  
7  
8 3  
9  
10 4 Kevin E. Kip, Ph.D.

11  
12 5 Clinical Analytics, UPMC, Pittsburgh, PA, USA

13  
14 6 [kipke2@upmc.edu](mailto:kipke2@upmc.edu)

15  
16  
17 7  
18 8 David M. Diamond, Ph.D.

19  
20 9 University of South Florida, Tampa, FL, USA

21  
22 10 [ddiamond@usf.edu](mailto:ddiamond@usf.edu)

23  
24  
25  
26 11  
27 12 Suresh R. Mulukutla, MD

28  
29 13 Heart and Vascular Institute, UPMC, Pittsburgh, PA, USA

30  
31 14 [mulukutlasr@upmc.edu](mailto:mulukutlasr@upmc.edu)

32  
33  
34  
35 15  
36 16 Oscar C. Marroquin, MD

37  
38 17 Clinical Analytics, UPMC, Pittsburgh, PA, USA

39  
40 18 [marroquinoc@upmc.edu](mailto:marroquinoc@upmc.edu)

41  
42  
43  
44 19  
45 20 **Correspondence to:**

46  
47 21 Kevin E. Kip, PhD, Vice President of Clinical Analytics, UPMC Health Services Division, 3600

48  
49 22 Forbes & Meyran, Forbes Tower, 9th Floor, Suite 9030, Pittsburgh, PA 15213, USA

50  
51 23 E-mail: [kipke2@upmc.edu](mailto:kipke2@upmc.edu)



1  
2  
3 **25 Abstract**  
4

5 **26 Objectives:** Among primary prevention-type adults not on lipid-lowering therapy, conflicting  
6  
7  
8 **27** results exist on the relationship between low density lipoprotein cholesterol (LDL-C) and long-  
9  
10 **28** term mortality. We evaluated this relationship in a real-world evidence population of adults.

11  
12 **29 Design:** Retrospective cohort study.

13  
14 **30 Setting:** Electronic medical record data for adults, from January 4, 2000, through December 31,  
15  
16  
17 **31** 2022, were extracted from the University of Pittsburgh Medical Center healthcare system.

18  
19 **32 Participants:** Non-diabetic adults aged 50-89 years not on statin therapy at baseline or within 1-  
20  
21  
22 **33** year and classified as primary prevention-type patients. To mitigate potential reverse causation,  
23  
24 **34** patients who died within 1-year or had baseline total cholesterol (T-C)  $\leq 120$  mg/dL or LDL-C  
25  
26 **35**  $< 30$  mg/dL were excluded.

27  
28 **36 Main exposure measure:** Baseline LDL-C categories of 30-79, 80-99, 100-129, 130-159, 160-  
29  
30  
31 **37** 189, or  $\geq 190$  mg/dL.

32  
33 **38 Main outcome measure:** All-cause mortality with follow-up starting 365 days after baseline  
34  
35  
36 **39** cholesterol measurement.

37  
38 **40 Results:** 177,860 patients with mean (SD) age of 61.1 (8.8) years and mean (SD) LDL-C of 119  
39  
40  
41 **41** (31) mg/dL were evaluated over mean of 6.1 years of follow-up. A U-shaped relationship was  
42  
43  
44 **42** observed between the six LDL-C categories and mortality with crude 10-year mortality rates of  
45  
46  
47 **43** 19.8%, 14.7%, 11.7%, 10.7%, 10.1%, and 14.0%, respectively. Adjusted mortality hazard ratios  
48  
49  
50 **44** (HRs) as compared with the referent group of LDL-C 80-99 mg/dL were: 30-79 mg/dL (HR  
51  
52 **45** 1.23, 95% CI 1.17-1.30), 100-129 mg/dL (0.87, 0.83-0.91), 130-159 mg/dL (0.88, 0.84-0.93),  
53  
54  
55 **46** 160-189 mg/dL (0.91, 0.84-0.98),  $\geq 190$  mg/dL (1.19, 1.06-1.34), respectively. Unlike LDL-C,  
56  
57  
58  
59  
60

1  
2  
3 47 both T-C/HDL cholesterol and triglycerides/HDL cholesterol ratios were independently  
4  
5 48 associated with long-term mortality.  
6

7  
8 49 **Conclusions.** Among non-diabetic primary prevention-type patients aged 50-89 years and not on  
9  
10 50 statin therapy, the lowest risk for long-term mortality appears to exist in the wide LDL-C range  
11  
12 51 of 100-189 mg/dL, which is much higher than current recommendations. For counseling these  
13  
14 52 patients, minimal consideration should be given to LDL-C concentration.  
15  
16

17 53  
18  
19  
20  
21  
22  
23  
24  
25  
26  
27  
28  
29  
30  
31  
32  
33  
34  
35  
36  
37  
38  
39  
40  
41  
42  
43  
44  
45  
46  
47  
48  
49  
50  
51  
52  
53  
54  
55  
56  
57  
58  
59  
60

1  
2  
3 54  
4  
5  
6  
7**STRENGTHS AND LIMITATIONS OF THIS STUDY**

- The cohort consisted of a large, “real-world” sample of adults across a large health system with long-term follow-up and sufficient precision for subgroup analyses.
- The study design mitigated potential for reverse causation of mortality by excluding patients who died within 1-year of baseline cholesterol measurement or had exceptionally low total or LDL-C levels at baseline.
- The analysis was limited to all-cause mortality and thus was unable to assess cause-specific mortality.

8  
9  
10  
11  
12  
13  
14  
15  
16  
17  
18  
19  
20  
21  
22  
23  
24 55  
25  
26  
27  
28  
29  
30  
31  
32  
33  
34  
35  
36  
37  
38  
39  
40  
41  
42  
43  
44  
45  
46  
47  
48  
49  
50  
51  
52  
53  
54  
55  
56  
57  
58  
59  
60

## 56 INTRODUCTION

57 Heart disease (HD), which includes atherosclerotic cardiovascular disease (ASCVD) as its  
58 primary component, is the leading cause of death in the United States.[1-2] A near universal but  
59 not absolute belief[3] is that high total cholesterol (T-C), low density lipoprotein cholesterol  
60 (LDL-C) in particular (the so-called “bad” cholesterol), is a root cause of ASCVD,[4] and that  
61 “lower is better” with a suggested optimal LDL-C level at or below 100 mg/dL.[5-6] In this  
62 regard, the American College of Cardiology (ACC) unequivocally implicates elevated LDL-C as  
63 a *de-facto* cause of ASCVD (and hence mortality) by stating that lowering of LDL-C with  
64 moderate intensity generic statins allows for efficacious and cost-effective primary prevention  
65 for those patients with an estimated 10-year risk of ASCVD  $\geq 7.5\%$ .[7] Risk of ASCVD is often  
66 estimated using the online ACC-ASCVD Risk Estimator,[8] and as seen in **Supplement Table**  
67 **1**, all males ages 59 and older even in the presence of “normal” ASCVD risk factors (lipids  
68 included) may be classified at intermediate or high risk of ASCVD, and thus candidates for  
69 LDL-C lowering therapy.

70 The overall belief that “lower LDL-C is better” for primary prevention of ASCVD is  
71 supported by the 25.5% estimated prevalence of use of statins in this setting for adults aged 40 to  
72 75 years.[9] Despite the generally accepted belief that “lower LDL-C is better,” meta-analyses  
73 indicate that high LDL-C is associated with at most a small increased absolute risk of ASCVD or  
74 premature mortality. First, in brief, in an extensive recent meta-analysis published in 2023 of 60  
75 randomized controlled trials that compared either placebo, usual care or less-intensive therapy to  
76 active or more potent lipid-lowering therapy, the number needed to treat (NNT) to reduce one  
77 death with active or more potent lipid-lowering therapy was exceptionally high at 754 persons.  
78 Moreover, there was no relationship between LDL-C percent lowering and risk of cardiovascular

1  
2  
3 79 mortality.[10] Similarly, whereas an earlier meta-analysis published in 2010 indicated that both  
4  
5 80 use and dose of statin therapy reduced the relative risk of major vascular events and all-cause  
6  
7 81 mortality, absolute risk reductions were very small (e.g., 0.2% absolute risk reduction in all-  
8  
9 82 cause mortality per 1.0 mmol/L reduction in LDL-C).[11] In the context of lipid-lowering  
10  
11 83 therapy, these findings call into question the prevailing belief that “lower LDL-C is better” at  
12  
13 84 least in terms of any appreciable clinical benefit.  
14  
15

16  
17 85 Second, acute coronary syndromes (ACS) routinely occur in patients with “normal”  
18  
19 86 LDL-C. For example, in a large cohort of 136,905 patients hospitalized with CAD (79%  
20  
21 87 attributed to ACS), of whom, 21% were on lipid-lowering therapy at admission, less than one-  
22  
23 88 quarter had an admission LDL-C >130 mg/dL.[12] In addition, women are generally considered  
24  
25 89 to be at overall lower risk of CHD mortality than men (e.g.,[13]), yet tend to have higher T-C  
26  
27 90 and LDL-C,[14] which is counterintuitive to higher LDL-C being associated with ASCVD and  
28  
29 91 premature mortality.  
30  
31

32  
33 92 Third, the field of life insurance medicine, which focuses principally on predicting  
34  
35 93 mortality hazards,[15] arguably conducts the most robust actuarial analyses of life expectancy.  
36  
37 94 Notably, in this field, the T-C/HDL-C ratio has been shown to be the best single measure of all-  
38  
39 95 cause mortality risk among various lipid tests, including LDL-C.[16] This is further supported by  
40  
41 96 examination of selected life insurance underwriting guidelines (obtained publicly and  
42  
43 97 summarized) from a large US insurance company.[17] As seen in **Supplement Table 2**, T-C and  
44  
45 98 HDL-C are used jointly in policy underwriting, whereas LDL-C is not used, and lipid-lowering  
46  
47 99 therapy is not emphasized. Moreover, notwithstanding other important patient factors (e.g., blood  
48  
49 100 pressure, smoking, etc.), **Supplement Table 2** shows that a person 70 years of age or older can  
50  
51 101 potentially qualify for a “preferred-plus” life insurance policy having a T-C value as high as 300  
52  
53  
54  
55  
56  
57  
58  
59  
60

1  
2  
3 102 mg/dL so long as the T-C/HDL-C ratio is 5.0 or lower (i.e., HDL-C  $\geq$ 60 mg/dL). This aligns  
4  
5 103 with meta-analyses/systematic reviews that report HDL-C to be inversely associated with all  
6  
7 104 cause and CVD mortality risks.[18-19]  
8  
9

10 105 The above-described examples of conflicting beliefs and findings, along with general  
11  
12 106 propensity for health professionals to prescribe LDL-C lowering therapies for primary  
13  
14 107 prevention based in part through routine risk assessment with the ACC-ASCVD Risk Estimator,  
15  
16 108 call for a critical appraisal and analysis of the relationship between LDL-C and long-term risk of  
17  
18 109 mortality in adults. Therefore, within a large, “real-world” healthcare system, we evaluated the  
19  
20 110 association between LDL-C and all-cause long-term mortality among non-diabetic primary  
21  
22 111 prevention-type adults aged 50 to 89 years. The analysis did not focus on the use of statin  
23  
24 112 therapy for primary prevention.  
25  
26  
27  
28  
29

## 30 114 **METHODS**

31  
32  
33 115 We conducted a retrospective cohort study of adults aged 50 to 89 years with hospital and/or  
34  
35 116 office visit data captured through the University of Pittsburgh Medical Center (UPMC)  
36  
37 117 electronic medical record (EMR) system. The date period for analysis was January 4, 2000,  
38  
39 118 through December 31, 2022. The Quality Improvement Review Committee and Institutional  
40  
41 119 Review Board provided ethical review and approval of the study as an exempt protocol (Project  
42  
43 120 ID: 4565), and all data remained deidentified for this analysis. Conduct and dissemination of  
44  
45 121 results from this observational study were performed in accordance with the STROBE  
46  
47 122 (STrengthening the Reporting of OBServational studies in Epidemiology) statement.  
48  
49  
50

## 51 123 **Data sources**

1  
2  
3 124 Health-related data captured in the UPMC EMR and its ancillary clinical systems were  
4  
5 125 aggregated and harmonized in a clinical data warehouse, as previously described.[20-21] For all  
6  
7 126 patients, we accessed sociodemographic data, medical history, and billing charges for all  
8  
9 127 outpatient and inpatient encounters with diagnoses and procedures coded based on the  
10  
11 128 International Classification of Diseases, Ninth and 10th Revisions.[22-23] Deaths were identified  
12  
13 129 using hospital discharge dispositions of “ceased to breathe” sourced from the inpatient medical  
14  
15 130 record system; deaths after discharge were identified externally via the Death Master File from  
16  
17 131 the Social Security Administration’s National Technical Information Service.[24] Cause of death  
18  
19 132 was unavailable for analysis. In secondary analyses, a composite outcome of ASCVD was  
20  
21 133 ascertained from UPMC hospital admission/discharge records, defined as the occurrence of  
22  
23 134 myocardial infarction, stroke, percutaneous coronary intervention, coronary artery bypass graft  
24  
25 135 surgery, or peripheral vascular disease.

### 30 136 **Eligibility criteria**

31  
32  
33 137 The index date for selection and analysis of patients aged 50 to 89 years was the first date of  
34  
35 138 cholesterol measurement performed whether through hospitalization or in conjunction with an  
36  
37 139 office visit (**Supplement Figure 1**). For analysis, we required non-missing laboratory values for  
38  
39 140 T-C, LDL-C, and HDL-C. The patient population was restricted to “primary prevention”  
40  
41 141 patients, defined as no prior history of diabetes, coronary artery disease (CAD), carotid artery  
42  
43 142 disease, peripheral vascular disease, cardiac arrest, hemorrhagic or ischemic stroke, or transient  
44  
45 143 ischemic attack (TIA). Other eligibility criteria included: self-reported race of either white or  
46  
47 144 black (due to very low prevalence of other races), and not on statin therapy at baseline or within  
48  
49 145 1-year of follow-up. In addition, to help offset potential bias due to reverse causation (i.e., very  
50  
51 146 low cholesterol being a marker for malnutrition and overall poor health), we excluded patients  
52  
53  
54  
55  
56  
57  
58  
59

1  
2  
3 147 who died within 1-year of the baseline cholesterol measurement, as well as those with baseline  
4  
5 148 T-C and/or LDL-C values of  $\leq 120$  or  $< 30$  mg/dL, respectively.  
6  
7

### 8 149 **Classification of lipid levels**

9  
10 150 From the baseline measurement, we classified patients into mutually exclusive lipid-level  
11  
12 151 categories using common clinical thresholds[25] including LDL-C (30-79, 80-99, 100-129, 130-  
13  
14 152 159, 160-189, or 190 mg/dL or higher) and T-C (121-160, 161-200, 201-240, 241-280, or 281  
15  
16 153 mg/dL or higher). In supplemental analyses, we classified the T-C/HDL-C ratio as  $\leq 3.0$ ,  $> 3.0$ -  
17  
18 154 4.0,  $> 4.0$ -5.0,  $> 5.0$ -6.0, or  $> 6.0$ , and triglycerides/HDL-C ratio into quintiles. Again, to  
19  
20 155 potentially mitigate potential bias due to reverse causation, we selected the LDL-C category of  
21  
22 156 80-99 mg/dL as the referent group, rather than the lowest LDL-C group (30-79 mg/dL).  
23  
24  
25

### 26 157 **Outcome measures**

27  
28 158 The main outcome measure was all-cause mortality with the number of days and years of follow-  
29  
30 159 up calculated starting 365 days after the baseline cholesterol measurement. For patients who did  
31  
32 160 not die, their length of follow-up was calculated starting 365 days after the baseline cholesterol  
33  
34 161 measurement and until their last record in the EMR system. In secondary analyses, the composite  
35  
36 162 outcome of occurrence of ASCVD was evaluated.  
37  
38  
39

### 40 163 **Statistical analysis**

41  
42 164 For patients within the respective study-defined baseline LDL-C categories, median and  
43  
44 165 interquartile range (IQR) for continuous variables and counts and percentages for categorical  
45  
46 166 variables are presented. For each LDL-C category, the Kaplan-Meier method was used to  
47  
48 167 calculate cumulative mortality rates at 1-, 5-, and 10-year follow-up, with survival curves plotted  
49  
50 168 at 6-month intervals out to 12 years. Patients who did not die were censored at last date of  
51  
52 169 follow-up. Cox regression was used to estimate hazard ratios (and corresponding 95%  
53  
54  
55  
56  
57  
58  
59



1  
2  
3 170 confidence intervals) of mortality over the full follow-up period by baseline LDL-C. A crude  
4  
5 171 model was first fit followed by an adjusted model that included covariates selected by a forward  
6  
7  
8 172 stepwise approach using an entry  $p$ -value of  $< .01$  and initiation of statin use any time after 1-  
9  
10 173 year of follow-up. Separate estimates for the relationship between initiation of statin use and  
11  
12 174 mortality are not presented due to expected immortal time bias (i.e., requirement to be alive  
13  
14 175 during follow-up to initiate statin use). Secondary analyses of lipid parameters used the same  
15  
16 176 methods as for LDL-C and included categories of the T-C/HDL-C and triglycerides/HDL-C  
17  
18 177 ratios.

19  
20  
21 178 In addition to the clinical categories used to define and evaluate baseline lipid levels, in  
22  
23 179 secondary analyses, each lipid parameter was evaluated in relation to mortality risk by use of  
24  
25 180 non-parametric generalized additive models using smoothing splines adjusting for the same  
26  
27 181 covariates used in the Cox regression models. The smoothing parameters including the number  
28  
29 182 of degrees of freedom were optimized by use of generalized cross validation (GCV).  
30  
31

32  
33 183 We used SAS, version 9.4 (SAS Institute) for all analyses.  
34

### 35 184 **Subgroup analyses**

36  
37 185 Subgroup analyses for estimation of the relationship between LDL-C category and mortality  
38  
39 186 included age (50-69, 70-89), sex (female, male), and baseline ASCVD risk classification  
40  
41 187 (low/borderline, intermediate, high, risk not determined).  
42  
43

### 44 188 **Patient and public involvement**

45  
46 189 None.  
47  
48

49 190

## 50 51 191 **RESULTS**

1  
2  
3 192 The mean (SD) LDL-C was 119 (31) mg/dL, and the prevalence of patients within the six LDL-  
4  
5 193 C categories was as follows: 30-79 (9.1%), 80-99 (18.3%), 100-129 (39.1%), 130-159 (24.4%),  
6  
7 194 160-189 (7.1%), or 190 mg/dL or higher (2.0%) (**Table 1**). The median age of patients was 59  
8  
9 195 years and mean age ranged nominally across the six LDL-C categories from 60.7 to 61.7 years.  
10  
11 196 There was a general indication of overall higher baseline risk in the group of patients with LDL-  
12  
13 197 C from 30-79 mg/dL (**Table 1**) (consistent with the stated concern of potential reverse  
14  
15 198 causation). This included a numerically higher prevalence of current smokers and those with a  
16  
17 199 history of various comorbidities (e.g., atrial fibrillation, arrhythmia, congestive heart failure,  
18  
19 200 chronic obstructive pulmonary disease), as well as nominally higher prevalence of selected  
20  
21 201 medication use (e.g., ACE inhibitors, beta-blockers, diuretics, opioids, direct oral  
22  
23 202 anticoagulants). History of cancer was slightly higher in the two lowest LDL-C categories,  
24  
25 203 whereas estimated 10-year ASCVD risk was highest in those with baseline LDL-C  $\geq$ 190 mg/dL.  
26  
27  
28  
29  
30

### 31 **Patient follow-up**

32  
33 205 The mean and median follow-up after excluding the study requirement to have survived at least  
34  
35 206 1-year after baseline cholesterol measurement was 6.1 and 5.9 years, respectively, and 17% of  
36  
37 207 patients had 10 or more years of follow-up. Across the six LDL-C categories, the mean years of  
38  
39 208 follow-up among patients who did not die ranged from 5.8 to 6.4 years. In total, 48.9% to 55.5%  
40  
41 209 of patients had their first LDL-C measurement in calendar year 2015 or earlier, and the  
42  
43 210 percentage of patients with their last follow-up extending into calendar year 2023 ranged from  
44  
45 211 57.8% to 63.4%, thereby suggesting non-informative censoring.  
46  
47  
48

### 49 **Overall assessment of mortality**

50  
51 213 In ascending order from lowest LDL-C category (30-79 mg/dL) to highest LDL-C category  
52  
53 214 ( $\geq$ 190 mg/dL), 10-year cumulative mortality rates were U-shaped at 19.8%, 14.7%, 11.7%,  
54  
55  
56  
57  
58  
59

1  
2  
3 215 10.7%, 10.1%, and 14.0% (**Table 2, Figures 1 and 2**). Adjusted mortality hazard ratios (HR)  
4  
5 216 and 95% confidence intervals (CI) (**Table 2**), as compared to the referent group of LDL-C 80-99  
6  
7 217 mg/dL, were as follows: 30-79 mg/dL (1.23, CI:1.17-1.30), 100-129 mg/dL (0.87, CI:0.83-0.91),  
8  
9 218 130-159 mg/dL (0.88, CI:0.84-0.93), 160-189 mg/dL (0.91, CI:0.84-0.98),  $\geq$ 190 mg/dL (1.19,  
10  
11 219 CI:1.06-1.34), respectively. Thus, the 3 LDL-C categories within the range of 100-189 mg/dL  
12  
13 220 showed similar, slightly lower mortality risk compared to the referent group of LDL-C 80-99  
14  
15 221 mg/dL. When evaluated as a continuous variable, the relationship between LDL-C and mortality  
16  
17 222 was mostly U-shaped, with the lowest risk of mortality in the range of approximately 110 to 190  
18  
19 223 mg/dL (**Supplement Figure 2, upper left**).

#### 24 224 **Assessment of ASCVD**

25  
26 225 In ascending order from lowest LDL-C category (30-79 mg/dL) to highest LDL-C category  
27  
28 226 ( $\geq$ 190 mg/dL), 10-year cumulative rates of ASCVD were U-shaped at 6.5%, 5.3%, 4.7%, 4.8%,  
29  
30 227 5.1%, and 7.6% (**Table 3, top half**). Adjusted HRs of risk of ASCVD as compared to the  
31  
32 228 referent group of LDL-C 80-99 mg/dL, were as follows: 30-79 mg/dL (1.10, CI:1.00-1.20), 100-  
33  
34 229 129 mg/dL (0.94, CI:0.88-1.00), 130-159 mg/dL (0.96, CI:0.89-1.03), 160-189 mg/dL (0.98,  
35  
36 230 CI:0.88-1.08),  $\geq$ 190 mg/dL (1.23, CI:1.06-1.43), respectively. Thus, the 3 LDL-C categories  
37  
38 231 within the range of 100-189 mg/dL showed similar yet nominally lower risk of ASCVD  
39  
40 232 compared to the referent group of LDL-C 80-99 mg/dL. Similar results were observed for the  
41  
42 233 composite outcome of ASCVD/mortality (**Table 3, bottom half**.) Baseline ASCVD risk  
43  
44 234 categories of low, medium, and high risk were strongly associated with 10-year rates of ASCVD  
45  
46 235 (1.9%, 4.9%, 9.8%, respectively).

#### 51 236 **Subgroup analyses**

1  
2  
3 237 For the two different age groups, the 3 LDL-C categories within the range of 100-189 mg/dL  
4  
5 238 showed relatively similar and slightly lower mortality risk compared to the referent group of  
6  
7 239 LDL-C 80-99 mg/dL (**Table 2, Figure 2**). In a similar manner for both females and males, the 3  
8  
9 240 LDL-C categories within the range of 100-189 mg/dL showed relatively similar and slightly  
10  
11 241 lower mortality risk compared to the referent group of LDL-C 80-99 mg/dL (**Supplement Table**  
12  
13 242 **3**). Males with LDL-C  $\geq 190$  mg/dL did not have a significantly higher risk of mortality than  
14  
15 243 those with LDL-C 80-99 mg/dL (adjusted HR = 1.06, CI: 0.85-1.32). When stratified by 10-year  
16  
17 244 ASCVD risk score, again, the 3 LDL-C categories within the range of 100-189 mg/dL showed  
18  
19 245 relatively similar and statistically lower mortality risk compared to the referent group of LDL-C  
20  
21 246 80-99 mg/dL (**Supplement Table 4**).

### 247 **Secondary lipid measures**

248 Patients with a T-C/HDL-C ratio  $>6.0$  had a significantly higher risk of mortality than those with  
249 a T-C/HDL-C ratio  $\leq 3.0$  (adjusted HR = 1.28, CI: 1.18-1.38, **Supplement Table 5**), with similar  
250 results by age (**Figure 2**). For the 3 T-C/HDL-C ratio categories  $\leq 3.0$ ,  $>3.0-4.0$ , and  $>4.0-5.0$ ,  
251 risk of mortality was similar. The triglycerides/HDL-C ratio showed the most consistent  
252 evidence of a gradient relationship with mortality with lower values (quintiles) progressively  
253 conferring lower risk of mortality (**Supplement Table 6**) and similar results by age (**Figure 2**).  
254 Compared to patients in the highest quintile of triglycerides/HDL-C ratio (value of  $\geq 3.44$ ), those  
255 in the lowest quintile (value of  $\leq 1.06$ ) had an estimated 24% lower risk of mortality (adjusted  
256 HR = 0.76, CI: 0.72-0.81). Thus, in aggregate and irrespective of age, the secondary lipid  
257 measures of T-C/HDL-C ratio and triglycerides/HDL-C ratio appeared to be more predictive of  
258 mortality than LDL-C, and a triglycerides/HDL-C ratio of about 1 or lower appears to be  
259 optimal.

1  
2  
3 260 When evaluated as continuous variables, the relationship between T-C and adjusted risk  
4  
5 261 of mortality was mostly U-shaped (similar to LDL-C), whereas other lipid/mortality relationships  
6  
7 262 presented in a mostly gradient manner (**Supplement Figure 2**). Specifically, lower HDL-C  
8  
9  
10 263 generally indicated higher adjusted risk of mortality, whereas higher triglycerides, total to HDL-  
11  
12 264 C ratio, and triglycerides to HDL-C ratio indicated higher adjusted risk of mortality.

### 14 265 **Evaluation of potential reverse causation**

16  
17 266 By study design, the 2,494 patient deaths that occurred from baseline LDL-C measurement to  
18  
19 267 365 days were excluded from the primary analysis. Among these excluded patients, the  
20  
21 268 percentage of deaths distributed by LDL-C (mg) category was: 30 to 79 (30.4%), 80 to 99  
22  
23 269 (20.1%), 100 to 129 (26.5%), 130 to 159 (14.6%), 160 to 189 (5.9%), 190 or higher (2.5%). The  
24  
25 270 30.4% of deaths in the 30 to 79 mg/dL category is much higher than the 9.1% prevalence of  
26  
27 271 patients in the 30 to 79 mg/dL category (see **table 1**) observed in the primary analysis. Similarly,  
28  
29 272 14.1% of deaths excluded in the first year had a total cholesterol value of 40 to 120 mg/dL  
30  
31 273 compared to 1.6% prevalence of patients in the primary analysis. These results validated the need  
32  
33 274 to remove the influence of potential reverse causality and early deaths and patients with very low  
34  
35 275 baseline cholesterol values from the analysis.  
36  
37  
38  
39

40 276

### 42 277 **DISCUSSION**

44  
45 278 In this analysis among non-diabetic primary prevention-type patients aged 50 to 89 years not on  
46  
47 279 statin therapy at baseline or within 1-year, we found no evidence of a gradient relationship  
48  
49 280 between LDL-C and long-term mortality risk. Instead, we observed that within the entire LDL-C  
50  
51 281 range of 100-189 mg/dL (about two-thirds of the total patient population), mortality risk was  
52  
53 282 similar and slightly lower than the referent LDL-C category of 80-99 mg/dL. These data conflict  
54  
55  
56  
57  
58  
59

1  
2  
3 283 with the prevailing belief that “lower LDL-C is better”[5-6] yet align with results from multiple  
4  
5 284 studies. A large general population study of adults from Denmark showed a U-shaped  
6  
7 285 relationship between LDL-C and long-term mortality, with lowest risk of all-cause mortality  
8  
9 286 (among individuals not receiving lipid lowering treatment) being an LDL-C value of 140  
10  
11 287 mg/dL.[26] Similarly, a large cohort study among Korean adults not on statin therapy showed a  
12  
13 288 U-shaped relationship between LDL-C and CVD mortality, with an optimal LDL-C range of 90  
14  
15 289 to 149 mg/dL.[27] Moreover, in a 20-year prospective cohort study of adults ages 18 and older  
16  
17 290 derived from the National Health and Nutrition Examination Survey III (NHANES III), the  
18  
19 291 lowest relative risk for all-cause mortality was for LDL-C in the range of 130 to <190  
20  
21 292 mg/dL.[28] Collectively, these results indicate that the “optimal” or “normal” range for LDL-C  
22  
23 293 for primary prevention of mortality among adults is likely wide and considerably higher than the  
24  
25 294 suggested optimal LDL-C level of  $\leq 100$  mg/dL.[5-6]

26  
27 295 For multiple reasons, we chose to evaluate a population of non-diabetic primary  
28  
29 296 prevention type adults aged 50 to 89 years not on statin therapy. First, both the prevalence and  
30  
31 297 potential indication for initiating lipid-lowering therapy is relatively high in this  
32  
33 298 population.[9,29,30] Second, prevailing guidelines and philosophy for initiating lipid-lowering  
34  
35 299 therapy for secondary prevention of ASCVD and among persons with diabetes are well  
36  
37 300 entrenched.[31-33] Third, consideration of initiating lipid-lowering therapy for primary  
38  
39 301 prevention, particularly among older adults, should be carefully weighed based on empirical  
40  
41 302 data[34-35] and potential side effects, including but not limited to muscle pain or weakness[36]  
42  
43 303 and increased risk of developing diabetes.[37-39]

44  
45 304 Beyond our principal finding of no indication that “lower LDL-C is better,” other  
46  
47 305 prominent findings were that overall and independent of age, the T-C/HDL-C and  
48  
49  
50  
51  
52  
53  
54  
55  
56  
57  
58  
59  
60

1  
2  
3 306 triglycerides/HDL-C ratios were predictive of long-term mortality risk, the latter of which  
4  
5 307 presented in a gradient manner. A study derived from NHANES data showed a U-shaped  
6  
7 308 relationship between T-C/HDL-C ratio and risk of all-cause mortality,[40] whereas results from  
8  
9 309 our analysis were unidirectional with elevated risk of mortality evident among adults with a T-  
10  
11 310 C/HDL-C ratio more than 5.0. Similar to our results, a large study among Korean adults showed  
12  
13 311 a gradient relationship between triglycerides/HDL-C ratio and risk of ischemic heart disease.[41]  
14  
15 312 Importantly, the triglyceride/HDL-C ratio has recently been reported to be a stronger predictor of  
16  
17 313 10-year development of type 2 diabetes (strongly associated with mortality risk) than LDL-C,  
18  
19 314 HDL-C, or triglycerides alone.[42]

20  
21  
22  
23  
24 315 The importance of high HDL-C alone, or in conjunction with other lipids, has been  
25  
26 316 extensively recognized. In brief, oxidative stress and inflammation are integral in the  
27  
28 317 pathophysiology of atherosclerosis and cardiovascular disease.[43] Importantly, HDL-C exerts  
29  
30 318 several physiological roles, prevents oxidation of LDL, and inhibits expression of pro-  
31  
32 319 inflammatory cytokines by macrophages, as well as expression of adhesion molecules by  
33  
34 320 endothelial cells,[44-46] and it is inversely associated with both all cause and CVD mortality  
35  
36 321 risks.[18-19] Moreover, it is likely not coincidental nor trivial that the field of life insurance  
37  
38 322 medicine recognizes and prioritizes the importance of HDL-C over LDL-C in determining  
39  
40 323 underwriting classifications.[16,17,47] Unfortunately, from a public health perspective, a meta-  
41  
42 324 analysis of 31 randomized controlled trials on the use of HDL-C modifying treatments showed  
43  
44 325 little to no effect on cardiovascular and all-cause mortality.[48]

45  
46  
47  
48  
49 326 There is an overall lack of consensus on the magnitude and statistical and clinical  
50  
51 327 interpretation of the reduction in mortality risk potentially achieved with the use of LDL-C  
52  
53 328 lowering therapies. Multiple reviews suggest that absolute mortality risk reductions from  
54  
55  
56  
57  
58  
59  
60



1  
2  
3 329 treatment with statins are small as compared to the more frequent reporting and emphasis of  
4  
5 330 relative risk reductions.[49-52] Moreover, mortality reductions with recent use of PCSK-9  
6  
7 331 inhibitors to lower LDL-C have been mixed and of low absolute risk.[53,54] Our postulate from  
8  
9 332 both this review (e.g.,[10]) and empirical analysis is that whatever small absolute reductions in  
10  
11 333 mortality risk may occur with use of LDL-C lowering therapies, they are most likely not causally  
12  
13 334 related to LDL-C lowering, but potentially to more broad pleiotropic effects. For example, statin  
14  
15 335 use has been shown to reduce inflammatory markers,[55] reduce vascular endothelial growth  
16  
17 336 factor (VEGF) concentrations,[56] reduce platelet activity,[57] and increase nitric oxide  
18  
19 337 bioavailability and stabilize atherosclerotic plaques.[58] These potential mechanisms of statins,  
20  
21 338 rather than concomitant lowering of LDL-C, per se, may be expected to result in some reduction  
22  
23 339 of ASCVD events.

24  
25  
26  
27  
28 340 Arguably, it is irrelevant to patients as to the exact mechanism(s) by which use of statins  
29  
30 341 and other lipid-lowering therapies may result in small absolute reductions in mortality risk.  
31  
32 342 Rather than focusing on LDL-C level, per se, we submit that health professionals should promote  
33  
34 343 established (causal) mechanisms that reduce future risk of major ASCVD events, including  
35  
36 344 weight, blood pressure, and blood sugar control, physical activity, avoidance of smoking, and  
37  
38 345 stress reduction. Similarly, our results suggest that adult non-diabetic patients counselled for  
39  
40 346 primary prevention of ASCVD be apprised of their estimated future risk of ASCVD with  
41  
42 347 minimal consideration of their LDL-C concentration and more consideration of the T-C/HDL  
43  
44 348 and triglyceride/HDL-C ratios along with other known causes of ASCVD (e.g., smoking,  
45  
46 349 physical inactivity). Moreover, use of coronary artery calcium scoring in primary prevention is  
47  
48 350 supported by a wealth of data showing that it substantially improves risk prediction including  
49  
50 351 when combined with traditional risk factors and scores.[59-61]  
51  
52  
53  
54  
55  
56  
57  
58  
59  
60



## 352 **Limitations**

353 Our study has limitations. First, we were unable to assess cause-specific mortality which would  
354 have provided additional insight into the relationship between LDL-C and CVD mortality.  
355 Similarly, our assessment of risk of ASCVD in relation to baseline LDL-C levels is based on  
356 ascertainment of events within UPMC hospitals and not external facilities – there is certainly  
357 some unknown level of ascertainment of ASCVD events. Second, we chose the index date for  
358 follow-up mortality assessment to begin 1-year after baseline cholesterol measurement to ideally  
359 minimize potential bias due to reverse causation (i.e., low LDL-C being an overall marker of  
360 malnutrition and poor health). However, low LDL-C has been frequently reported in cancer  
361 patients (e.g., [25,62,63]) and many cancers have a viral etiologic component[64] and with  
362 potentially long latency. Theoretically, some patients with the lowest LDL-C values in our  
363 analysis may have been in the early stages of cancer development and hence at elevated long-  
364 term mortality risk. This is why we chose LDL-C 80-99 mg/dL as the referent group (rather than  
365 30-79 mg/dL), and the observation that mortality risk was similar across a wide range of LDL-C  
366 values (100–189 mg/dL) argues against appreciable bias due to reverse causation. Third, absence  
367 of statin use at baseline and within the first year of the study (inclusion criterion) was based on  
368 patient reported data in the EMR and not from prescription data – this leaves open the possibility  
369 for some misclassification. In addition, the study requirement for absence of statin at baseline or  
370 within one year may have resulted in a patient population generally less likely to initiate lipid-  
371 lowering therapy in the long-term. Lastly, we cannot rule out potential residual confounding  
372 despite statistical adjustment for a large set of covariates associated with mortality.

373

## 374 **CONCLUSIONS**

1  
2  
3 375 Our analysis indicates that among non-diabetic primary prevention-type patients aged 50 to 89  
4  
5 376 years and not on statin therapy, the lowest risk for long-term mortality exists in the wide LDL-C  
6  
7 377 range of 100-189 mg/dL which is much higher than current recommendations. Our analysis also  
8  
9 378 shows that lower T-C/HDL-C and triglycerides/HDL-C ratios are independently associated with  
10  
11 379 lower mortality risk, whereas LDL-C appears to be of limited to no predictive value.  
12  
13  
14 380 Collectively, these observations suggest that adult non-diabetic patients counselled for primary  
15  
16 381 prevention of ASCVD be apprised of their estimated future risk of ASCVD with minimal  
17  
18 382 consideration of their LDL-C concentration and more consideration of the T-C/HDL and  
19  
20 383 triglycerides/HDL-C ratios along with other established causes of ASCVD (e.g., high blood  
21  
22 384 pressure, smoking, physical inactivity) and potentially coronary artery calcium scoring.  
23  
24  
25  
26  
27  
28  
29  
30

### 31 **Contributors**

32  
33 388 Kevin E Kip: conception, statistical analysis, writing, and editing. David M Diamond:  
34  
35 389 conception, critical review, and editing. Suresh R Mulukutla: critical review and editing. Oscar C  
36  
37 390 Marroquin: conception, critical review, and editing.  
38  
39  
40  
41

### 42 **Funding**

43  
44  
45 393 This research received no specific grant from any funding agency in the public, commercial, or  
46  
47 394 not-for-profit sectors.  
48  
49  
50

### 51 **Competing interests**

52 396 None.  
53  
54  
55  
56  
57  
58  
59  
60

1  
2  
3 3984  
5 399 **Patient consent for publication**6  
7  
8 400 Not applicable.9  
10 40111  
12 402 **Ethics approval**13  
14 403 The Quality Improvement Review Committee and Institutional Review Board at the University  
15 404 of Pittsburgh Medical Center provided ethical review and approval of the study as an exempt  
16  
17 405 protocol (Project ID: 4565), and all data remained deidentified for this analysis.  
18  
19  
2021  
22 40623  
24 407 **Provenance and peer review**25  
26 408 Not commissioned, externally peer reviewed.27  
28 40929  
30  
31 410 **Data availability statement**32  
33 411 *Study protocol:* No separate study protocol was required a priori, as this retrospective analysis  
34  
35 412 was deemed a quality improvement initiative with ethical review and approval granted by the  
36  
37 413 UPMC Quality Improvement Review Committee and Institutional Review Board. *Statistical*  
38  
39 414 *code:* Selected statistical code may be requested from Dr. Kevin Kip (e-mail,  
40  
41 415 kipke2@upmc.edu). *Dataset:* The dataset contains protected health information and will not be  
42  
43 416 available.  
44  
45  
4647 417  
48  
49  
50  
51  
52  
53  
54  
55  
56  
57  
58  
59  
60

418 **References**

- 419 1. Heron M. Deaths: Leading Causes for 2019. Centers for Disease Control and Prevention,  
420 National Vital Statistics Reports, Vol. 70, No. 9, July 26, 2021. Available at:  
421 <https://www.cdc.gov/nchs/data/nvsr/nvsr70/nvsr70-09-508.pdf>. Accessed June 9, 2023.
- 422 2. US Centers for Disease Control and Prevention. Leading causes of death and injury.  
423 Available at <https://www.cdc.gov/injury/wisqars/LeadingCauses.html>. Accessed June 9,  
424 2023.
- 425 3. Ravnskov U, de Lorgeril M, Diamond DM, et al. LDL-C does not cause cardiovascular  
426 disease: a comprehensive review of the current literature. *Expert Rev Clin Pharmacol*  
427 2018; 10:959-70.
- 428 4. Ference BA, Ginsberg HN, Graham I, et al. Low-density lipoproteins cause  
429 atherosclerotic cardiovascular disease. 1. Evidence from genetic, epidemiologic, and  
430 clinical studies. A consensus statement from the European Atherosclerosis Society  
431 Consensus Panel. *Eur Heart J* 2017; 38:2459-72.
- 432 5. American Heart Association. What is cholesterol? Available at: [https://www.heart.org/-  
433 /media/Files/Health-Topics/Cholesterol/What-is-Cholesterol.pdf](https://www.heart.org/-/media/Files/Health-Topics/Cholesterol/What-is-Cholesterol.pdf). Accessed June 9, 2023.
- 434 6. O'Keefe JH Jr, Cordain L, Harris WH, Moe RM, Vogel R. Optimal low-density  
435 lipoprotein is 50 to 70 mg/dl: lower is better and physiologically normal. *J Am Coll*  
436 *Cardiol* 2004; 43:2142-6.
- 437 7. Grundy SM, Stone NJ, Bailey AL, et al. Guideline on the management of blood  
438 cholesterol: A report of the American College of Cardiology/American Heart Association  
439 Task Force on Clinical Practice Guidelines. *Circulation* 2019; 139:e1082-e1143. Epub  
440 2018 Nov 10. Erratum in: *Circulation* 2019; 18:e1182-e1186.

- 1  
2  
3 441 8. American College of Cardiology. ASCVD Risk Estimate Plus. Available at:  
4  
5 442 <https://tools.acc.org/ascvd-risk-estimator-plus/#!/calculate/estimate/>. Accessed June 9,  
6  
7 443 2023.
- 8  
9  
10 444 9. Jacobs JA, Addo DK, Zheutlin AR, et al. Prevalence of statin use for primary prevention  
11  
12 445 of atherosclerotic cardiovascular disease by race, ethnicity, and 10-year disease risk in the  
13  
14 446 US: National Health and Nutrition Examination Surveys, 2013 to March 2020. *JAMA*  
15  
16 *Cardiol* 2023; 8:443–52.
- 17  
18  
19 448 10. Ennezat PV, Guerbaai RA, Maréchaux S, Le Jemtel TH, François P. Extent of low-  
20  
21 449 density lipoprotein cholesterol reduction and all-cause and cardiovascular mortality  
22  
23 450 benefit: A systematic review and meta-analysis. *J Cardiovasc Pharmacol* 2023; 81:35-  
24  
25 451 44.
- 26  
27  
28 452 11. Cholesterol Treatment Trialists' (CTT) Collaboration; Baigent C, Blackwell L, Emberson  
29  
30 453 J, et al. Efficacy and safety of more intensive lowering of LDL cholesterol: a meta-  
31  
32 454 analysis of data from 170,000 participants in 26 randomised trials. *Lancet* 2010; 376:  
33  
34 455 1670-81.
- 35  
36  
37 456 12. Sachdeva A, Cannon CP, Deedwania PC, et al. Lipid levels in patients hospitalized with  
38  
39 457 coronary artery disease: an analysis of 136,905 hospitalizations in Get With The  
40  
41 458 Guidelines. *Am Heart J* 2009; 157:111-17.
- 42  
43  
44 459 13. Bots SH, Peters SAE, Woodward M. Sex differences in coronary heart disease and stroke  
45  
46 460 mortality: a global assessment of the effect of ageing between 1980 and 2010. *BMJ Glob*  
47  
48 461 *Health* 2017; 27;2(2):e000298.

- 1  
2  
3 462 14. Shohaimi S, Boekholdt MS, Luben R, Wareham NJ, Khaw KT. Distribution of lipid  
4  
5 463 parameters according to different socio-economic indicators- the EPIC-Norfolk  
6  
7 464 prospective population study. *BMC Public Health* 2014; 14:782.  
8  
9  
10 465 15. Kneepkens RF, Lindeboom R. Age dependent decline of relative risks in life insurance  
11  
12 466 medical underwriting. *J Insur Med* 2014; 44:170-83.  
13  
14 467 16. Fulks M, Stout RL, Dolan VF. Association of cholesterol, LDL, HDL, cholesterol/HDL  
15  
16 468 and triglyceride with all-cause mortality in life insurance applicants. *J Insur Med* 2009;  
17  
18 469 41:244-53. Erratum in: *J Insur Med* 2011; 42:108.  
19  
20  
21 470 17. MetLife. The Condensed Underwriting Guide. May 2013. Available at:  
22  
23 471 [http://www.cassaniinsurance.com/wp-content/uploads/2018/02/Met-Life-  
26  
27 473 condensed\\_uw\\_guide.pdf](http://www.cassaniinsurance.com/wp-content/uploads/2018/02/Met-Life-<br/>24<br/>25 472 condensed_uw_guide.pdf). Accessed June 4, 2023.  
28  
29 474 18. Liu L, Han M, Qie R, et al. A dose-response meta-analysis to evaluate the relationship  
30  
31 475 between high-density lipoprotein cholesterol and all-cause and cardiovascular disease  
32  
33 476 mortality. *J Endocrinol Invest* 2022; 45:551-62.  
34  
35 477 19. Ravnskov U, Diamond DM, Hama R, et al. Lack of an association or an inverse  
36  
37 478 association between low-density-lipoprotein cholesterol and mortality in the elderly: a  
38  
39 479 systematic review. *BMJ Open* 2016; 6:e010401.  
40  
41  
42 480 20. Kip KE, McCreary EK, Collins K, et al. Evolving real-world effectiveness of monoclonal  
43  
44 481 antibodies for treatment of COVID-19: A cohort study. *Ann Intern Med* 2023; 176:496-  
45  
46 482 504.  
47  
48  
49 483 21. Reitz KM, Seymour CW, Vates J, et al. Strategies to Promote ResiliencY (SPRY): a  
50  
51 484 randomised embedded multifactorial adaptative platform (REMAP) clinical trial protocol  
52  
53  
54  
55  
56  
57  
58  
59  
60

- 1  
2  
3 484 to study interventions to improve recovery after surgery in high-risk patients. *BMJ Open*.  
4  
5 485 2020; 10:e037690.  
6  
7  
8 486 22. Centers for Disease Control and Prevention. International Classification of Diseases,  
9  
10 487 Ninth Revision, Clinical Modification (ICD-9-CM). Accessed at  
11  
12 488 [www.cdc.gov/nchs/icd/icd9cm.htm](http://www.cdc.gov/nchs/icd/icd9cm.htm) on 13 April 2022.  
13  
14  
15 489 23. Centers for Disease Control and Prevention. International Classification of Diseases,  
16  
17 490 Tenth Revision, Clinical Modification (ICD-10-CM). Accessed at  
18  
19 491 [www.cdc.gov/nchs/icd/icd-10-cm.htm](http://www.cdc.gov/nchs/icd/icd-10-cm.htm) on 13 April 2022.  
20  
21  
22 492 24. Social Security Administration. Requesting SSA's Death Information. Accessed at  
23  
24 493 [www.ssa.gov/dataexchange/request\\_dmf.html](http://www.ssa.gov/dataexchange/request_dmf.html) on 13 April 2022.  
25  
26 494 25. MedlinePlus [Internet]. Bethesda (MD): National Library of Medicine (US). LDL: The  
27  
28 495 "Bad" Cholesterol. Available at: <https://medlineplus.gov/ldlthebadcholesterol.html>.  
29  
30  
31 496 Accessed June 16, 2023.  
32  
33 497 26. Johannesen CDL, Langsted A, Mortensen MB, Nordestgaard BG. Association between  
34  
35 498 low density lipoprotein and all cause and cause specific mortality in Denmark:  
36  
37 499 prospective cohort study. *BMJ* 2020; 371:m4266: Erratum in: *BMJ* 2021; 12;372.  
38  
39  
40 500 27. Yi SW, An SJ, Park HB, Yi JJ, Ohrr H. Association between low-density lipoprotein  
41  
42 501 cholesterol and cardiovascular mortality in statin non-users: a prospective cohort study in  
43  
44 502 14.9 million Korean adults. *Int J Epidemiol* 2022; 51:1178-1189.  
45  
46  
47 503 28. Rong S, Li B, Chen L, Sun Y, Du Y, Liu B, Robinson JG, Bao W. Association of low-  
48  
49 504 density lipoprotein cholesterol levels with more than 20-year risk of cardiovascular and  
50  
51 505 all-cause mortality in the general population. *J Am Heart Assoc* 2022; 11:e023690.  
52  
53  
54  
55  
56  
57  
58  
59

- 1  
2  
3 506 29. Arnett DK, Blumenthal RS, Albert MA, et al. 2019 ACC/AHA guideline on the primary  
4 prevention of cardiovascular disease: A report of the American College of  
5 507  
6 prevention of cardiovascular disease: A report of the American College of  
7  
8 508 Cardiology/American Heart Association Task Force on Clinical Practice Guidelines.  
9  
10 509 *Circulation* 2019; 140:e596-e646. Erratum in: *Circulation* 2019; 140:e649-e650. Erratum  
11  
12 510 in: *Circulation* 2020; 141:e60. Erratum in: *Circulation* 2020; 141:e774.
- 14 511 30. Lloyd-Jones DM, Braun LT, Ndumele CE, et al. Use of risk assessment tools to guide  
15  
16 512 decision-making in the primary prevention of atherosclerotic cardiovascular disease: A  
17  
18 513 special report from the American Heart Association and American College of  
19  
20 514 Cardiology. *Circulation* 2019; 139:e1162-e1177. Erratum in: *Circulation* 2019;  
21  
22 515 139:e1188.
- 26 516 31. Banach M, Penson PE. Statins and LDL-C in secondary prevention-so much progress, so  
27  
28 517 far to go. *JAMA Netw Open* 2020; 3:e2025675.
- 31 518 32. Tecson KM, Kluger AY, Cassidy-Bushrow AE, et al. Usefulness of statins as secondary  
32  
33 519 prevention against recurrent and terminal major adverse cardiovascular events. *Am J*  
34  
35 520 *Cardiol* 2022; 176:37-42.
- 38 521 33. Stone NJ, Robinson JG, Lichtenstein AH, et al; American College of  
39  
40 522 Cardiology/American Heart Association Task Force on Practice Guidelines. 2013  
41  
42 523 ACC/AHA guideline on the treatment of blood cholesterol to reduce atherosclerotic  
43  
44 524 cardiovascular risk in adults: a report of the American College of Cardiology/American  
45  
46 525 Heart Association Task Force on Practice Guidelines. *J Am Coll Cardiol* 2014; 63(25 Pt  
47  
48 526 B):2889-34. Erratum in: *J Am Coll Cardiol* 2014; 63(25 Pt B):3024-25. Erratum in: *J Am*  
49  
50 527 *Coll Cardiol* 2015; 66:2812.



- 1  
2  
3 528 34. Gurwitz JH, Go AS, Fortmann SP. Statins for primary prevention in older adults:  
4  
5 529 uncertainty and the need for more evidence. *JAMA* 2016; 316:1971-72.  
6  
7  
8 530 35. Han BH, Sutin D, Williamson JD, et al. ALLHAT Collaborative Research Group. Effect  
9  
10 531 of statin treatment vs. usual care on primary cardiovascular prevention among older  
11  
12 532 adults: The ALLHAT-LLT Randomized Clinical Trial. *JAMA Intern Med* 2017; 177:955-  
13  
14 533 65.  
15  
16  
17 534 36. Cholesterol Treatment Trialists' Collaboration. Effect of statin therapy on muscle  
18  
19 535 symptoms: an individual participant data meta-analysis of large-scale, randomised,  
20  
21 536 double-blind trials. *Lancet* 2022; 400:832-45. Erratum in: *Lancet* 2022; 400:1194.  
22  
23  
24 537 37. Mansi IA, Chansard M, Lingvay I, Zhang S, Halm EA, Alvarez CA. Association of statin  
25  
26 538 therapy initiation with diabetes progression: A retrospective matched-cohort study. *JAMA*  
27  
28 539 *Intern Med* 2021; 181:1562-74.  
29  
30  
31 540 38. Crandall JP, Mather K, Rajpathak SN, et al. Statin use and risk of developing diabetes:  
32  
33 541 results from the Diabetes Prevention Program. *BMJ Open Diabetes Res Care* 2017;  
34  
35 542 5:e000438. Erratum in: *BMJ Open Diabetes Res Care* 2017; 5: e000438corr1.  
36  
37  
38 543 39. Abbasi F, Lamendola C, Harris CS, et al. Statins are associated with increased insulin  
39  
40 544 resistance and secretion. *Arterioscler Thromb Vasc Biol* 2021; 41:2786-97.  
41  
42  
43 545 40. Zhou D, Liu X, Lo K, Huang Y, Feng Y. The effect of total cholesterol/high-density  
44  
45 546 lipoprotein cholesterol ratio on mortality risk in the general population. *Front Endocrinol*  
46  
47 547 *(Lausanne)* 2022; 13:1012383.  
48  
49 548 41. Park B, Jung DH, Lee HS, Lee YJ. Triglyceride to HDL-cholesterol ratio and the incident  
50  
51 549 risk of ischemic heart disease among Koreans without diabetes: A longitudinal study  
52  
53 550 using national health insurance data. *Front Cardiovasc Med* 2021; 8:716698.  
54  
55  
56  
57  
58  
59  
60

- 1  
2  
3 551 42. Yuge H, Okada H, Hamaguchi M, Kurogi K, Murata H, Ito M, Fukui M.  
4  
5 552 Triglycerides/HDL cholesterol ratio and type 2 diabetes incidence: Panasonic Cohort  
6  
7 553 Study 10. *Cardiovasc Diabetol* 2023; 22:308.  
8  
9  
10 554 43. Ho E, Karimi Galoughi K, Liu CC, Bhindi R, Figtree GA. Biological markers of  
11  
12 555 oxidative stress: applications to cardiovascular research and practice. *Redox Biol* 2013;1:  
13  
14 556 483–91.  
15  
16 557 44. Mackness B, Mackness M. The antioxidant properties of high-density lipoproteins in  
17  
18 558 atherosclerosis. *Panminerva Med* 2010; 54:83–90.  
19  
20 559 45. Cockerill GW, Rye KA, Gamble JR, Vadas MA, Barter PJ. High-density lipoproteins  
21  
22 560 inhibit cytokine-induced expression of endothelial cell adhesion molecules. *Arterioscler*  
23  
24 561 *Thromb Vasc Biol* 1995; 15:1987–94.  
25  
26  
27 562 46. Nicholls SJ, Rye KA, Barter PJ. High-density lipoproteins as therapeutic targets. *Curr*  
28  
29 563 *Opin Lipidol* 2005; 16:345–9.  
30  
31 564 47. Gleeson R. Atherogenic dyslipidemia--a medical underwriter's iceberg. *J Insur Med*  
32  
33 565 2009; 41:264-9.  
34  
35  
36 566 48. Riaz H, Khan SU, Rahman H, et al. Effects of high-density lipoprotein targeting  
37  
38 567 treatments on cardiovascular outcomes: A systematic review and meta-analysis. *Eur J*  
39  
40 568 *Prev Cardiol* 2019; 26:533-43.  
41  
42  
43 569 49. Byrne P, Demasi M, Jones M, Smith SM, O'Brien KK, DuBroff R. Evaluating the  
44  
45 570 association between low-density lipoprotein cholesterol reduction and relative and  
46  
47 571 absolute effects of statin treatment: A systematic review and meta-analysis. *JAMA Intern*  
48  
49 572 *Med* 2022; 182:474-81. Erratum in: *JAMA Intern Med* 2022; 182:579.  
50  
51  
52  
53  
54  
55  
56  
57  
58  
59  
60

- 1  
2  
3 573 50. Diamond DM, Leaverton PE. Historical review of the use of relative risk statistics in the  
4  
5 574 portrayal of the purported hazards of high LDL cholesterol and the benefits of lipid-  
6  
7 575 lowering therapy. *Cureus* 2023; 15:e38391. Erratum in: *Cureus* 2023; 15:c116.  
8  
9  
10 576 51. Ravnskov U, Alabdulgader A, de Lorgeril M, et al. The new European guidelines for  
11  
12 577 prevention of cardiovascular disease are misleading. *Expert Rev Clin Pharmacol* 2020;  
13  
14 578 13:1289-94.  
15  
16  
17 579 52. Diamond DM, Ravnskov U. How statistical deception created the appearance that statins  
18  
19 580 are safe and effective in primary and secondary prevention of cardiovascular disease.  
20  
21 581 *Expert Rev Clin Pharmacol* 2015; 8:201-10.  
22  
23  
24 582 53. Dicembrini I, Giannini S, Ragghianti B, Mannucci E, Monami M. Effects of PCSK9  
25  
26 583 inhibitors on LDL cholesterol, cardiovascular morbidity and all-cause mortality: a  
27  
28 584 systematic review and meta-analysis of randomized controlled trials. *J Endocrinol Invest*  
29  
30 585 2019; 42:1029-39.  
31  
32  
33 586 54. Steg PG, Szarek M, Bhatt DL, et al. Effect of alirocumab on mortality after acute  
34  
35 587 coronary syndromes. *Circulation* 2019; 140:103-112.  
36  
37  
38 588 55. Tabrizi R, Tamtaji OR, Mirhosseini N, et al. The effects of statin use on inflammatory  
39  
40 589 markers among patients with metabolic syndrome and related disorders: A systematic  
41  
42 590 review and meta-analysis of randomized controlled trials. *Pharmacol Res* 2019; 141:85-  
43  
44 591 103.  
45  
46  
47 592 56. Sahebkar A, Ponziani MC, Goitre I, Bo S. Does statin therapy reduce plasma VEGF  
48  
49 593 levels in humans? A systematic review and meta-analysis of randomized controlled trials.  
50  
51 594 *Metabolism* 2015; 64:1466-76.  
52  
53  
54  
55  
56  
57  
58  
59  
60

- 1  
2  
3 595 57. Puccetti L, Pasqui AL, Pastorelli M, et al. Time-dependent effect of statins on platelet  
4  
5 596 function in hypercholesterolaemia. *Eur J Clin Invest* 2002; 32:901-8.  
6  
7  
8 597 58. Davignon J. Beneficial cardiovascular pleiotropic effects of statins. *Circulation* 2004;  
9  
10 598 109(23 Suppl 1):III39-43.  
11  
12 599 59. Blumenthal RS, Cainzos-Achirica M. The Ever-Growing Role of Coronary Artery  
13  
14 600 Calcium in Primary Prevention. Available at: [https://www.acc.org/Latest-in-](https://www.acc.org/Latest-in-Cardiology/Articles/2021/06/21/13/05/The-Ever-Growing-Role-of-CAC-in-Primary-Prevention)  
15  
16 601 [Cardiology/Articles/2021/06/21/13/05/The-Ever-Growing-Role-of-CAC-in-Primary-](https://www.acc.org/Latest-in-Cardiology/Articles/2021/06/21/13/05/The-Ever-Growing-Role-of-CAC-in-Primary-Prevention)  
17  
18 602 [Prevention](https://www.acc.org/Latest-in-Cardiology/Articles/2021/06/21/13/05/The-Ever-Growing-Role-of-CAC-in-Primary-Prevention). Accessed June 20, 2023.  
19  
20  
21 603 60. Nasir K, Cainzos-Achirica M. Role of coronary artery calcium score in the primary  
22  
23 604 prevention of cardiovascular disease. *BMJ* 2021; 373:n776.  
24  
25  
26 605 61. Bittencourt MS, Nasir K, Santos RD, Al-Mallah MH. Very high LDL cholesterol: The  
27  
28 606 power of zero passes another test. *Atherosclerosis* 2020; 292:207-8.  
29  
30  
31 607 62. Tanne JH. Meta-analysis says low LDL cholesterol may be associated with greater risk of  
32  
33 608 cancer. *BMJ* 2007; 335:177.  
34  
35  
36 609 63. Benn M, Tybjaerg-Hansen A, Stender S, Frikke-Schmidt R, Nordestgaard BG. Low-  
37  
38 610 density lipoprotein cholesterol and the risk of cancer: a mendelian randomization study. *J*  
39  
40 611 *Natl Cancer Inst* 2011; 103:508-19.  
41  
42  
43 612 64. Plummer M, de Martel C, Vignat J, Ferlay J, Bray F, Franceschi S. Global burden of  
44  
45 613 cancers attributable to infections in 2012: a synthetic analysis. *Lancet Glob Health* 2016;  
46  
47 614 4:e609-16.  
48  
49  
50  
51  
52  
53  
54  
55  
56  
57  
58  
59  
60

1  
2  
3 616 **FIGURE LEGENDS**  
4

5 617 **Figure 1.** Plot of cumulative mortality rates in 6-month intervals over 12 years of follow-up  
6  
7  
8 618 by baseline LDL-C category. Dashed lines depict the 3 lowest LDL-C categories  
9  
10 619 (30-79, 80-99, 100-129 mg/dL) and solid lines depict the highest LDL-C  
11  
12 620 categories (130-159, 160-189,  $\geq 190$  mg/dL).  
13

14 621 **Figure 2.** Plot of mortality hazard ratios (HR, filled circles) and 95% confidence intervals  
15  
16 622 (vertical lines) across categories of LDL cholesterol (top), total cholesterol to  
17  
18 623 HDL cholesterol ratio (middle), and triglycerides to HDL cholesterol ratio  
19  
20 624 (bottom). The left side of the graph is for patients aged 50-69 years; the right side  
21  
22 625 is for patients aged 70-89 years. The dashed line reflects the referent group null  
23  
24 626 value (1.0) for the HR. Q: quintile. Each model is adjusted for: age, race, sex,  
25  
26 627 BMI, current smoker, former smoker, history of the following in the past year:  
27  
28 628 hypertension, atrial fibrillation, arrhythmia, congestive heart failure, cancer,  
29  
30 629 chronic obstructive pulmonary disease, chronic kidney disease, baseline systolic  
31  
32 630 and diastolic blood pressure, glucose, and the following medications in the past  
33  
34 631 year: ACE Inhibitors, beta-blockers, calcium blockers, any SBP lowering  
35  
36 632 medication, diuretics, aspirin, DOACS, anti-depressants, opioids, and statin  
37  
38 633 initiation  $>1$  year after baseline cholesterol measurement.  
39  
40  
41  
42  
43  
44  
45  
46

47 635 **Supplement Figure 1.** Flow diagram of selection of patients for the study cohort.  
48

49 636 **Supplement Figure 2.** Continuous spline plots of the relationship between different lipid  
50  
51 637 parameters and adjusted risk of long-term mortality. The spline  
52  
53 638 includes 95% confidence bands, with narrower bands indicating a  
54  
55  
56  
57  
58  
59  
60

1  
2  
3 639 higher prevalence of patients with the given lipid value. X-axis  
4  
5 640 values below the horizontal line with 0.0 value indicate lower risk  
6  
7  
8 641 of mortality; X-axis values above the line indicate higher risk of  
9  
10 642 mortality.

11  
12 643

13  
14  
15 644

16  
17  
18  
19  
20  
21  
22  
23  
24  
25  
26  
27  
28  
29  
30  
31  
32  
33  
34  
35  
36  
37  
38  
39  
40  
41  
42  
43  
44  
45  
46  
47  
48  
49  
50  
51  
52  
53  
54  
55  
56  
57  
58  
59  
60

For peer review only

**Table 1. Baseline characteristics of study population by baseline LDL cholesterol value**

| Characteristic                                           | Baseline LDL cholesterol value (mg/dL) |                        |                          |                          |                          |                            |
|----------------------------------------------------------|----------------------------------------|------------------------|--------------------------|--------------------------|--------------------------|----------------------------|
|                                                          | 30 to 79<br>(n=16,162)                 | 80 to 99<br>(n=32,517) | 100 to 129<br>(n=69,399) | 130 to 159<br>(n=43,333) | 160 to 189<br>(n=12,663) | 190 or higher<br>(n=3,586) |
| Age, median, (IQR)                                       | 59, (54,67)                            | 59, (54,67)            | 59, (54,66)              | 59, (54,65)              | 59, (54,65)              | 60, (54,67)                |
| Age, n, (%)                                              |                                        |                        |                          |                          |                          |                            |
| 50 to 59                                                 | 8167, (50.5)                           | 16551, (50.9)          | 35706, (51.5)            | 22811, (52.6)            | 6694, (52.9)             | 1765, (49.2)               |
| 60 to 69                                                 | 4686, (29.0)                           | 9742, (30.0)           | 21632, (31.2)            | 13797, (31.8)            | 4029, (31.8)             | 1162, (32.4)               |
| 70 to 79                                                 | 2221, (13.7)                           | 4399, (13.5)           | 8808, (12.7)             | 5103, (11.8)             | 1439, (11.4)             | 514, (13.3)                |
| 80 and older                                             | 1088, (6.7)                            | 1825, (5.6)            | 3253, (4.7)              | 1622, (3.7)              | 501, (4.0)               | 145, (4.0)                 |
| Sex                                                      |                                        |                        |                          |                          |                          |                            |
| Female                                                   | 9027, (55.9)                           | 18965, (58.3)          | 42697, (61.5)            | 28034, (64.7)            | 8654, (68.3)             | 2562, (71.4)               |
| Male                                                     | 7135, (44.1)                           | 13552, (41.7)          | 26702, (38.5)            | 15299, (35.3)            | 4009, (31.7)             | 1024, (28.6)               |
| Race                                                     |                                        |                        |                          |                          |                          |                            |
| Black                                                    | 1700, (10.5)                           | 2350, (7.2)            | 3855, (5.6)              | 2076, (4.8)              | 607, (4.8)               | 208, (5.8)                 |
| White                                                    | 14462, (89.5)                          | 30167, (92.8)          | 65544, (94.4)            | 41257, (95.2)            | 12056, (95.2)            | 3378, (94.2)               |
| Former smoker, n, (%)                                    | 4172, (27.3)                           | 8270, (26.9)           | 16871, (25.7)            | 10354, (25.3)            | 2933, (24.5)             | 858, (25.5)                |
| Current smoker, n, (%)                                   | 3287, (21.5)                           | 5430, (17.6)           | 9822, (15.0)             | 6274, (15.3)             | 1998, (16.7)             | 668, (19.8)                |
| Body mass index, median, (IQR)                           | 25.8, (25.2,33.2)                      | 26.3, (25.2,33.8)      | 26.6, (25.2,34.0)        | 26.9, (25.2,33.9)        | 26.9, (25.2,33.6)        | 26.7, (25.2,33.1)          |
| History of obesity, n, (%)                               | 6011, (37.2)                           | 12438, (38.3)          | 26946, (38.8)            | 16949, (39.1)            | 4899, (38.7)             | 1326, (37.0)               |
| History of obstructive sleep apnea, n, (%)               | 932, (5.8)                             | 1831, (5.6)            | 3619, (5.2)              | 1931, (4.5)              | 507, (4.0)               | 136, (3.8)                 |
| History of hypertension, n, (%)                          | 5540, (34.3)                           | 11331, (34.8)          | 23634, (34.1)            | 13435, (31.0)            | 3621, (28.6)             | 1060, (29.6)               |
| History of atrial fibrillation, n, (%)                   | 687, (4.3)                             | 1181, (3.6)            | 1930, (2.8)              | 845, (2.0)               | 214, (1.7)               | 60, (1.7)                  |
| History of arrhythmia, n, (%)                            | 1178, (7.3)                            | 2254, (6.9)            | 4143, (6.0)              | 2054, (4.7)              | 528, (4.2)               | 133, (3.7)                 |
| History of valvular heart disease, n, (%)                | 431, (2.7)                             | 834, (2.6)             | 1505, (2.2)              | 798, (1.8)               | 246, (1.9)               | 60, (1.7)                  |
| History of congestive heart failure, n, (%)              | 251, (1.6)                             | 375, (1.2)             | 597, (0.9)               | 245, (0.6)               | 80, (0.6)                | 15, (0.4)                  |
| History of deep vein thrombosis, n, (%)                  | 184, (1.1)                             | 323, (1.0)             | 667, (1.0)               | 356, (0.8)               | 93, (0.8)                | 25, (0.7)                  |
| History of cancer, n, (%)                                | 1554, (9.6)                            | 2916, (9.0)            | 5597, (8.0)              | 3348, (7.7)              | 912, (7.2)               | 281, (7.8)                 |
| History of chronic obstructive pulmonary disease, n, (%) | 1147, (7.1)                            | 1783, (5.5)            | 3156, (4.5)              | 1666, (3.8)              | 474, (3.7)               | 146, (4.1)                 |
| History of chronic kidney disease, n, (%)                | 329, (2.0)                             | 424, (1.3)             | 695, (1.0)               | 356, (0.8)               | 126, (1.0)               | 42, (1.2)                  |
| History of depression, n, (%)                            | 1985, (12.3)                           | 3981, (12.2)           | 8327, (12.0)             | 5214, (12.0)             | 1606, (12.7)             | 440, (12.3)                |
| Systolic BP (mmHg), median, (IQR)                        | 128, (118,140)                         | 127, (118,138)         | 128, (118,139)           | 128, (120,140)           | 128, (120,140)           | 130, (120,140)             |
| Diastolic BP (mmHg), median, (IQR)                       | 78, (70,84)                            | 78, (70,84)            | 80, (71,84)              | 80, (72,84)              | 80, (72,84)              | 80, (72,86)                |
| HDL cholesterol (mg/dL), median, (IQR)                   | 57 (45,73)                             | 56 (44,70)             | 55 (45,68)               | 55 (45,66)               | 54 (45,65)               | 53 (45,64)                 |
| Total/HDL cholesterol, median, (IQR)                     | 2.5, (2.2,3.0)                         | 3.0, (2.5,3.6)         | 3.5, (3.0,4.2)           | 4.0, (3.4,4.8)           | 4.6, (4.0,5.5)           | 5.5, (4.6,6.5)             |
| Triglycerides (mg/dL), median, (IQR)                     | 90, (63,137)                           | 91, (67,131)           | 100, (74,140)            | 111, (83,151)            | 125, (94,167)            | 149, (110,201)             |
| Hemoglobin (g/dL), median, (IQR)                         | 13.7, (12.6,14.7)                      | 13.9, (12.9,14.8)      | 14.0, (13.1,14.9)        | 14.1, (13.3,15.0)        | 14.2, (13.4,15.0)        | 14.1, (13.3,15.0)          |
| Glucose (mg/dL), median, (IQR)                           | 94, (87,104)                           | 94, (87,103)           | 94, (88,102)             | 94, (88,102)             | 95, (89,103)             | 96, (89,105)               |

|                                                               |                 |                 |                 |                 |                 |                 |
|---------------------------------------------------------------|-----------------|-----------------|-----------------|-----------------|-----------------|-----------------|
| ACE Inhibitor, n, (%)                                         | 2060, (12.7)    | 3992, (12.3)    | 8024, (11.6)    | 4454, (10.3)    | 1205, (9.5)     | 328, (9.1)      |
| Angiotensin receptor blocker, n, (%)                          | 1028, (6.4)     | 2017, (6.2)     | 3927, (5.7)     | 2018, (4.7)     | 558, (4.4)      | 156, (4.4)      |
| Beta blocker, n, (%)                                          | 2747, (17.0)    | 4827, (14.8)    | 8969, (12.9)    | 4709, (10.9)    | 1352, (10.7)    | 430, (12.0)     |
| Calcium blocker, n, (%)                                       | 1931, (11.9)    | 3501, (10.8)    | 6612, (9.5)     | 3534, (8.2)     | 956, (7.5)      | 297, (8.3)      |
| Diuretic, n, (%)                                              | 2662, (16.5)    | 4763, (14.6)    | 8814, (12.7)    | 4717, (10.9)    | 1257, (9.9)     | 390, (10.9)     |
| Anti-depressant, n, (%)                                       | 3497, (21.6)    | 6504, (20.0)    | 13784, (19.9)   | 8624, (19.9)    | 2628, (20.8)    | 797, (22.2)     |
| Opioids, n, (%)                                               | 3319, (20.5)    | 5400, (16.6)    | 9688, (14.0)    | 5711, (13.2)    | 1599, (12.6)    | 523, (14.2)     |
| Anti-platelet agent, n, (%)                                   | 2209, (13.7)    | 4319, (13.3)    | 9006, (13.0)    | 5057, (11.7)    | 1267, (10.0)    | 402, (11.2)     |
| Aspirin, n, (%)                                               | 3082, (19.1)    | 6087, (18.7)    | 12511, (18.0)   | 7117, (16.4)    | 1922, (15.2)    | 586, (16.3)     |
| Direct oral anticoagulant, n, (%)                             | 423, (2.6)      | 684, (2.1)      | 1086, (1.6)     | 479, (1.1)      | 133, (1.1)      | 33, (0.9)       |
| ASCVD 10-year risk, median, (IQR)                             | 5.8, (2,3,12.6) | 5.8, (2,5,12.7) | 5.9, (2,8,12.3) | 6.3, (3,1,12.2) | 6.8, (3,6,13.0) | 8.7, (4,6,15.7) |
| ASCVD 10-year risk, n, (%)                                    |                 |                 |                 |                 |                 |                 |
| Low                                                           | 6204, (58.8)    | 12166, (58.3)   | 25457, (58.6)   | 15048, (57.3)   | 4144, (54.1)    | 900, (43.0)     |
| Intermediate                                                  | 2887, (27.4)    | 5804, (27.8)    | 12514, (28.8)   | 8161, (31.1)    | 2596, (33.9)    | 839, (40.0)     |
| High                                                          | 1459, (13.8)    | 2888, (13.8)    | 5472, (12.6)    | 3045, (11.6)    | 913, (11.9)     | 356, (17.0)     |
| Started statin use >1 year after baseline measurement, n, (%) | 484, (3.0)      | 921, (2.8)      | 2948, (4.2)     | 3448, (8.0)     | 1600, (12.6)    | 644, (18.0)     |



**Table 2. Risks and hazard ratios for death by LDL cholesterol level at baseline**

| LDL cholesterol (mg/dL)    | n     | Cumulative incidence (%) |        |         | Total # deaths | Crude HR | Adjusted HR | 95% C.I.    |
|----------------------------|-------|--------------------------|--------|---------|----------------|----------|-------------|-------------|
|                            |       | 1-year                   | 5-year | 10-year |                |          |             |             |
| 30 to 79                   | 16162 | 2.7                      | 11.3   | 19.8    | 2159           | 1.41     | 1.23        | 1.17 – 1.30 |
| 80 to 99                   | 32517 | 1.7                      | 8.1    | 14.7    | 3232           | 1.0      | 1.0         | -----       |
| 100 to 129                 | 69399 | 1.1                      | 6.0    | 11.7    | 5415           | 0.77     | 0.87        | 0.83 – 0.91 |
| 130 to 159                 | 43333 | 1.0                      | 5.2    | 10.7    | 2971           | 0.69     | 0.88        | 0.84 – 0.93 |
| 160 to 189                 | 12663 | 1.2                      | 5.4    | 10.1    | 821            | 0.68     | 0.91        | 0.84 – 0.98 |
| 190 or higher              | 3586  | 1.8                      | 7.9    | 14.0    | 317            | 0.96     | 1.19        | 1.06 – 1.34 |
| <b>Patients aged 50-69</b> |       |                          |        |         |                |          |             |             |
| 30 to 79                   | 12853 | 1.8                      | 8.1    | 14.2    | 1241           | 1.52     | 1.20        | 1.20 – 1.39 |
| 80 to 99                   | 26293 | 1.1                      | 5.2    | 9.6     | 1745           | 1.0      | 1.0         | -----       |
| 100 to 129                 | 57338 | 0.7                      | 3.9    | 7.6     | 2924           | 0.76     | 0.86        | 0.81 – 0.92 |
| 130 to 159                 | 36608 | 0.7                      | 3.4    | 6.9     | 1653           | 0.69     | 0.85        | 0.79 – 0.91 |
| 160 to 189                 | 10723 | 0.9                      | 3.7    | 6.5     | 472            | 0.70     | 0.89        | 0.81 – 0.99 |
| 190 or higher              | 2927  | 1.2                      | 5.7    | 9.4     | 181            | 1.01     | 1.24        | 1.06 – 1.44 |
| <b>Patients aged 70-89</b> |       |                          |        |         |                |          |             |             |
| 30 to 79                   | 3309  | 6.3                      | 24.3   | 42.7    | 918            | 1.25     | 1.15        | 1.06 – 1.25 |
| 80 to 99                   | 6224  | 4.5                      | 20.5   | 37.2    | 1487           | 1.0      | 1.0         | -----       |
| 100 to 129                 | 12061 | 2.7                      | 16.0   | 31.4    | 2491           | 0.80     | 0.87        | 0.82 – 0.93 |
| 130 to 159                 | 6725  | 2.8                      | 15.3   | 30.8    | 1318           | 0.76     | 0.91        | 0.84 – 0.98 |
| 160 to 189                 | 1940  | 2.9                      | 15.0   | 29.7    | 349            | 0.75     | 0.92        | 0.82 – 1.04 |
| 190 or higher              | 659   | 4.5                      | 17.5   | 34.2    | 136            | 0.90     | 1.15        | 0.96 – 1.37 |

\* Model adjusted for age, race, sex, BMI, current smoker, former smoker, history of the following in the past year: hypertension, atrial fibrillation, arrhythmia, congestive heart failure, cancer, chronic obstructive pulmonary disease, chronic kidney disease, baseline systolic and diastolic blood pressure, glucose, and the following medications in the past year: ACE Inhibitors, beta-blockers, calcium blockers, any SBP lowering medication, diuretics, aspirin, DOACS, anti-depressants, opioids, and statin initiation >1 year after baseline cholesterol measurement.

**Table 3. Risks and hazard ratios for ASCVD and ASCVD/mortality by LDL cholesterol levels at baseline**

| LDL Cholesterol (mg/dL) | n     | Cumulative incidence (%) |        |         | Total # events | Crude HR | Adj. HR Model | 95% C.I.    |
|-------------------------|-------|--------------------------|--------|---------|----------------|----------|---------------|-------------|
|                         |       | 1-year                   | 5-year | 10-year |                |          |               |             |
| <b>ASCVD</b>            |       |                          |        |         |                |          |               |             |
| 30 to 79                | 16162 | 0.8                      | 3.9    | 6.5     | 816            | 1.25     | 1.10          | 1.00 – 1.20 |
| 80 to 99                | 32517 | 0.5                      | 2.8    | 5.3     | 1341           | 1.0      | 1.0           | -----       |
| 100 to 129              | 69399 | 0.6                      | 2.5    | 4.7     | 2509           | 0.87     | 0.94          | 0.88 – 1.00 |
| 130 to 159              | 43333 | 0.5                      | 2.4    | 4.8     | 1586           | 0.89     | 0.96          | 0.89 – 1.03 |
| 160 to 189              | 12663 | 0.5                      | 2.7    | 5.1     | 490            | 0.98     | 0.98          | 0.88 – 1.08 |
| 190 or higher           | 3586  | 0.9                      | 4.7    | 7.6     | 205            | 1.50     | 1.23          | 1.06 – 1.43 |
| <b>ASCVD/Mortality</b>  |       |                          |        |         |                |          |               |             |
| 30 to 79                | 16162 | 1.0                      | 11.8   | 21.4    | 2590           | 1.36     | 1.19          | 1.14 – 1.26 |
| 80 to 99                | 32517 | 0.8                      | 8.4    | 16.5    | 4014           | 1.0      | 1.0           | -----       |
| 100 to 129              | 69399 | 0.6                      | 6.4    | 13.5    | 6952           | 0.79     | 0.89          | 0.85 – 0.92 |
| 130 to 159              | 43333 | 0.5                      | 5.8    | 12.8    | 4005           | 0.74     | 0.90          | 0.86 – 0.94 |
| 160 to 189              | 12663 | 0.5                      | 6.5    | 12.6    | 1160           | 0.77     | 0.93          | 0.87 – 0.99 |
| 190 or higher           | 3586  | 0.9                      | 9.9    | 18.5    | 452            | 1.12     | 1.20          | 1.08 – 1.32 |

**Model:** Adjusted for age, race, BMI, current smoker, former smoker, history of the following in the past year: hypertension, atrial fibrillation, arrhythmia, congestive heart failure, cancer, chronic obstructive pulmonary disease, chronic kidney disease, baseline systolic and diastolic blood pressure, glucose, and the following medications in the past year: ACE Inhibitors, beta-blockers, calcium blockers, any SBP lowering medication, diuretics, aspirin, DOACS, anti-depressants, opioids, and statin initiation >1 year after baseline cholesterol measurement.

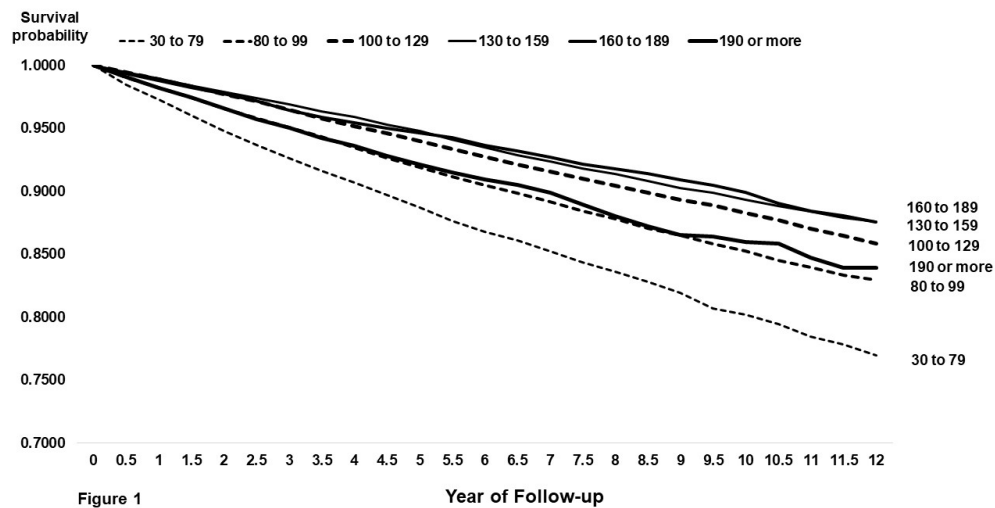

Figure 1.

Plot of cumulative mortality rates in 6-month intervals over 12 years of follow-up by baseline LDL-C category. Dashed lines depict the 3 lowest LDL-C categories (30-79, 80-99, 100-129 mg/dL) and solid lines depict the highest LDL-C categories (130-159, 160-189, >190 mg/dL).

338x190mm (96 x 96 DPI)



Figure 2.

Plot of mortality hazard ratios (HR, filled circles) and 95% confidence intervals (vertical lines) across categories of LDL cholesterol (top), total cholesterol to HDL cholesterol ratio (middle), and triglycerides to HDL cholesterol ratio (bottom). The left side of the graph is for patients aged 50-69 years; the right side is for patients aged 70-89 years. The dashed line reflects the referent group null value (1.0) for the HR. Q: quintile. Each model is adjusted for: age, race, sex, BMI, current smoker, former smoker, history of the following in the past year: hypertension, atrial fibrillation, arrhythmia, congestive heart failure, cancer, chronic obstructive pulmonary disease, chronic kidney disease, baseline systolic and diastolic blood pressure, glucose, and the following medications in the past year: ACE Inhibitors, beta-blockers, calcium blockers, any SBP lowering medication, diuretics, aspirin, DOACS, anti-depressants, opioids, and statin initiation >1 year after baseline cholesterol measurement.

338x190mm (96 x 96 DPI)

**Supplement Table 1. ASCVD 10-Year Risk Calculations for Primary Prevention\* by Age, Race, and Sex**

| Age | White Male |               | Black (AA) Male |               | White Female |               | Black (AA) Female |               |
|-----|------------|---------------|-----------------|---------------|--------------|---------------|-------------------|---------------|
|     | 10-yr risk | Risk Category | 10-yr risk      | Risk Category | 10-yr risk   | Risk Category | 10-yr risk        | Risk Category |
| 50  | 3.5%       | Low           | 5.2%            | Borderline    | 1.4%         | Low           | 2.2%              | Low           |
| 51  | 3.8%       | Low           | 5.4%            | Borderline    | 1.5%         | Low           | 2.4%              | Low           |
| 52  | 4.2%       | Low           | 5.7%            | Borderline    | 1.7%         | Low           | 2.6%              | Low           |
| 53  | 4.6%       | Low           | 6.0%            | Borderline    | 1.8%         | Low           | 2.9%              | Low           |
| 54  | 5.1%       | Borderline    | 6.2%            | Borderline    | 2.0%         | Low           | 3.1%              | Low           |
| 55  | 5.6%       | Borderline    | 6.5%            | Borderline    | 2.2%         | Low           | 3.4%              | Low           |
| 56  | 6.1%       | Borderline    | 6.8%            | Borderline    | 2.4%         | Low           | 3.7%              | Low           |
| 57  | 6.6%       | Borderline    | 7.1%            | Borderline    | 2.6%         | Low           | 4.0%              | Low           |
| 58  | 7.2%       | Borderline    | 7.4%            | Borderline    | 2.9%         | Low           | 4.4%              | Low           |
| 59  | 7.9%       | Intermediate  | 7.7%            | Intermediate  | 3.1%         | Low           | 4.7%              | Low           |
| 60  | 8.5%       | Intermediate  | 8.0%            | Intermediate  | 3.5%         | Low           | 5.1%              | Borderline    |
| 61  | 9.2%       | Intermediate  | 8.3%            | Intermediate  | 3.8%         | Low           | 5.5%              | Borderline    |
| 62  | 10.0%      | Intermediate  | 8.7%            | Intermediate  | 4.2%         | Low           | 6.0%              | Borderline    |
| 63  | 10.8%      | Intermediate  | 9.0%            | Intermediate  | 4.6%         | Low           | 6.4%              | Borderline    |
| 64  | 11.7%      | Intermediate  | 9.3%            | Intermediate  | 5.1%         | Borderline    | 6.9%              | Borderline    |
| 65  | 12.5%      | Intermediate  | 9.7%            | Intermediate  | 5.6%         | Borderline    | 7.4%              | Borderline    |
| 66  | 13.5%      | Intermediate  | 10.0%           | Intermediate  | 6.2%         | Borderline    | 8.0%              | Intermediate  |
| 67  | 14.5%      | Intermediate  | 10.4%           | Intermediate  | 6.9%         | Borderline    | 8.5%              | Intermediate  |
| 68  | 15.5%      | Intermediate  | 10.7%           | Intermediate  | 7.6%         | Intermediate  | 9.1%              | Intermediate  |
| 69  | 16.6%      | Intermediate  | 11.1%           | Intermediate  | 8.4%         | Intermediate  | 9.7%              | Intermediate  |
| 70  | 17.8%      | Intermediate  | 11.5%           | Intermediate  | 9.3%         | Intermediate  | 10.4%             | Intermediate  |
| 71  | 19.0%      | Intermediate  | 11.9%           | Intermediate  | 10.3%        | Intermediate  | 11.1%             | Intermediate  |
| 72  | 20.2%      | High          | 12.3%           | Intermediate  | 11.3%        | Intermediate  | 11.8%             | Intermediate  |
| 73  | 21.5%      | High          | 12.7%           | Intermediate  | 12.5%        | Intermediate  | 12.5%             | Intermediate  |
| 74  | 22.9%      | High          | 13.1%           | Intermediate  | 13.8%        | Intermediate  | 13.3%             | Intermediate  |
| 75  | 24.3%      | High          | 13.5%           | Intermediate  | 15.3%        | Intermediate  | 14.1%             | Intermediate  |
| 76  | 25.7%      | High          | 13.9%           | Intermediate  | 16.8%        | Intermediate  | 15.0%             | Intermediate  |
| 77  | 27.3%      | High          | 14.3%           | Intermediate  | 18.5%        | Intermediate  | 15.9%             | Intermediate  |
| 78  | 28.8%      | High          | 14.7%           | Intermediate  | 20.4%        | High          | 16.8%             | Intermediate  |
| 79  | 30.4%      | High          | 15.2%           | Intermediate  | 22.5%        | High          | 17.7%             | Intermediate  |

\*Defined as non-diabetic persons with approximate guideline-driven “normal” values for total cholesterol (190 mg/dL), LDL cholesterol (125 mg/dL), HDL cholesterol (45 mg/dL for males, 55 mg/dL for females), systolic blood pressure (125 mmHg), diastolic blood pressure (75 mmHg), no history of smoking, not on anti-hypertensive medications, not on statin therapy, not on aspirin therapy.

<https://tools.acc.org/ascvd-risk-estimator-plus/#!/calculate/estimate/>

**Supplement Table 2. Maximum/Range of Total Cholesterol (T-C) Values Along with T-C to HDL-C Cholesterol Ratios for Different Life Insurance Underwriting Categories**

| Age Category   | Life Insurance Underwriting Category |                                     |                                             |                                      |
|----------------|--------------------------------------|-------------------------------------|---------------------------------------------|--------------------------------------|
|                | Elite Plus*<br>(ages 18-75)          | Preferred Plus*<br>(ages 18-75)     | Standard Plus<br>(ages 18-75)               | Standard<br>(all ages)               |
| 54 and younger | 220/4.5                              | 240/5.0                             | 260/6.0 or 280/5.5<br>280/6.5 or 300/6.0    | -----                                |
| 55 to 69       | 230/4.5                              | 260/5.5 or 280/5.0                  | 150 to 300/7.0 or<br>150 to 310/6.5         | -----                                |
| 70 and older   | 150 to 240/5.0                       | 150 to 280/5.5 or<br>150 to 300/5.0 | Current medication<br>acceptable (all ages) | -----                                |
| 0 to 44        | -----                                | -----                               | -----                                       | ≤300/9.6 or<br>>300/8.0              |
| 45 to 65       | -----                                | -----                               | -----                                       | ≤350/9.6 or<br>351 to 400/8.0        |
| 66 and older   | -----                                | -----                               | -----                                       | 150 to 350/10.5 or<br>351 to 375/9.6 |

\*Current medication OK if acceptable level maintained for at least 12 months (all ages)

Source: [http://www.cassaniinsurance.com/wp-content/uploads/2018/02/Met-Life-condensed\\_uw\\_guide.pdf](http://www.cassaniinsurance.com/wp-content/uploads/2018/02/Met-Life-condensed_uw_guide.pdf)

**Supplement Table 3. Risks and Hazard Ratios of Death by LDL Cholesterol Levels at Baseline Stratified by Sex at Baseline**

| LDL Cholesterol (mg/dL) | n     | Cumulative incidence (%) |        |         | Total # deaths | Crude HR | Adj. HR Model | 95% C.I.    |
|-------------------------|-------|--------------------------|--------|---------|----------------|----------|---------------|-------------|
|                         |       | 1-year                   | 5-year | 10-year |                |          |               |             |
| <b>Female</b>           |       |                          |        |         |                |          |               |             |
| 30 to 79                | 9027  | 2.3                      | 9.4    | 17.1    | 1043           | 1.42     | 1.23          | 1.14 – 1.33 |
| 80 to 99                | 18965 | 1.4                      | 6.7    | 12.3    | 1597           | 1.0      | 1.0           | -----       |
| 100 to 129              | 42697 | 0.8                      | 5.2    | 10.5    | 2985           | 0.82     | 0.88          | 0.83 – 0.94 |
| 130 to 159              | 28034 | 0.9                      | 4.8    | 10.2    | 1802           | 0.78     | 0.89          | 0.83 – 0.95 |
| 160 to 189              | 8654  | 1.1                      | 5.2    | 9.7     | 542            | 0.80     | 0.91          | 0.82 – 1.00 |
| 190 or higher           | 2562  | 1.8                      | 7.8    | 14.6    | 233            | 1.20     | 1.24          | 1.08 – 1.42 |
| <b>Male</b>             |       |                          |        |         |                |          |               |             |
| 30 to 79                | 7135  | 3.3                      | 13.7   | 23.4    | 1116           | 1.37     | 1.22          | 1.13 – 1.32 |
| 80 to 99                | 13552 | 2.2                      | 10.0   | 18.4    | 1635           | 1.0      | 1.0           | -----       |
| 100 to 129              | 26702 | 1.5                      | 7.2    | 13.8    | 2430           | 0.73     | 0.86          | 0.80 – 0.91 |
| 130 to 159              | 15299 | 1.3                      | 6.0    | 11.5    | 1169           | 0.61     | 0.85          | 0.79 – 0.92 |
| 160 to 189              | 4009  | 1.4                      | 5.6    | 10.8    | 279            | 0.58     | 0.90          | 0.79 – 1.02 |
| 190 or higher           | 1024  | 1.8                      | 8.1    | 12.2    | 84             | 0.72     | 1.06          | 0.85 – 1.32 |

**Model:** Adjusted for age, race, BMI, current smoker, former smoker, history of the following in the past year: hypertension, atrial fibrillation, arrhythmia, congestive heart failure, cancer, chronic obstructive pulmonary disease, chronic kidney disease, baseline systolic and diastolic blood pressure, glucose, and the following medications in the past year: ACE Inhibitors, beta-blockers, calcium blockers, any SBP lowering medication, diuretics, aspirin, DOACS, anti-depressants, opioids, and statin initiation >1 year after baseline cholesterol measurement.

**Supplement Table 4. Risks and Hazard Ratios of Death by LDL Cholesterol Levels at Baseline Stratified by ASCVD Risk Classification**

| LDL cholesterol (mg/dL)          | n     | Cumulative incidence (%) |        |         | Total # deaths | Crude HR | Adj. HR Model | 95% C.I.    |
|----------------------------------|-------|--------------------------|--------|---------|----------------|----------|---------------|-------------|
|                                  |       | 1-year                   | 5-year | 10-year |                |          |               |             |
| <b>Low or Borderline Risk</b>    |       |                          |        |         |                |          |               |             |
| 30 to 79                         | 6204  | 1.5                      | 6.7    | 12.2    | 505            | 1.66     | 1.51          | 1.34 – 1.70 |
| 80 to 99                         | 12166 | 1.0                      | 4.2    | 7.2     | 607            | 1.0      | 1.0           | -----       |
| 100 to 129                       | 25457 | 0.6                      | 2.9    | 5.6     | 927            | 0.73     | 0.78          | 0.70 – 0.86 |
| 130 to 159                       | 15048 | 0.5                      | 2.5    | 5.2     | 483            | 0.66     | 0.75          | 0.66 – 0.84 |
| 160 to 189                       | 4144  | 0.6                      | 2.7    | 4.7     | 126            | 0.65     | 0.75          | 0.62 – 0.91 |
| 190 or higher                    | 900   | 0.6                      | 4.3    | 7.7     | 43             | 1.05     | 1.18          | 0.86 – 1.61 |
| <b>Intermediate Risk</b>         |       |                          |        |         |                |          |               |             |
| 30 to 79                         | 2887  | 3.5                      | 15.6   | 27.1    | 491            | 1.38     | 1.25          | 1.11 – 1.40 |
| 80 to 99                         | 5804  | 2.6                      | 11.4   | 21.3    | 758            | 1.0      | 1.0           | -----       |
| 100 to 129                       | 12514 | 1.6                      | 8.4    | 16.6    | 1267           | 0.75     | 0.80          | 0.73 – 0.87 |
| 130 to 159                       | 8161  | 1.4                      | 7.0    | 13.8    | 670            | 0.61     | 0.69          | 0.62 – 0.77 |
| 160 to 189                       | 2596  | 1.5                      | 7.0    | 12.2    | 193            | 0.58     | 0.68          | 0.58 – 0.79 |
| 190 or higher                    | 839   | 2.6                      | 9.6    | 14.8    | 77             | 0.77     | 0.89          | 0.70 – 1.13 |
| <b>High Risk</b>                 |       |                          |        |         |                |          |               |             |
| 30 to 79                         | 1459  | 7.9                      | 28.0   | 49.9    | 447            | 1.25     | 1.17          | 1.04 – 1.32 |
| 80 to 99                         | 2888  | 5.4                      | 23.6   | 43.3    | 772            | 1.0      | 1.0           | -----       |
| 100 to 129                       | 5472  | 3.4                      | 19.3   | 36.6    | 1242           | 0.82     | 0.85          | 0.77 – 0.92 |
| 130 to 159                       | 3045  | 3.8                      | 17.6   | 33.5    | 610            | 0.73     | 0.78          | 0.70 – 0.87 |
| 160 to 189                       | 913   | 3.9                      | 17.9   | 32.3    | 177            | 0.75     | 0.82          | 0.70 – 0.97 |
| 190 or higher                    | 356   | 4.1                      | 15.7   | 34.2    | 69             | 0.71     | 0.81          | 0.63 – 1.04 |
| <b>ASCVD Risk Not Determined</b> |       |                          |        |         |                |          |               |             |
| 30 to 79                         | 5612  | 2.3                      | 10.1   | 18.0    | 716            | 1.45     | 1.34          | 1.22 – 1.48 |
| 80 to 99                         | 11659 | 1.3                      | 6.9    | 13.0    | 1095           | 1.0      | 1.0           | -----       |
| 100 to 129                       | 25956 | 0.8                      | 5.2    | 10.6    | 1979           | 0.80     | 0.85          | 0.79 – 0.91 |
| 130 to 159                       | 17079 | 0.8                      | 4.6    | 10.1    | 1208           | 0.74     | 0.85          | 0.78 – 0.92 |
| 160 to 189                       | 5010  | 1.0                      | 4.5    | 9.5     | 325            | 0.72     | 0.85          | 0.75 – 0.96 |
| 190 or higher                    | 1491  | 1.5                      | 7.3    | 12.6    | 128            | 0.98     | 1.17          | 0.97 – 1.41 |

**Model:** Adjusted for age, BMI, history of the following in the past year: atrial fibrillation, arrhythmia, congestive heart failure, cancer, chronic obstructive pulmonary disease, chronic kidney disease, glucose, and the following medications in the past year: aspirin, DOACS, anti-depressants, opioids, and statin initiation >1 year after baseline cholesterol measurement.



Supplement Table 5. Risks and Hazard Ratios of Death by Total Cholesterol to HDL Cholesterol Ratio at Baseline

| Total/HDL Cholesterol Ratio | n     | Cumulative incidence (%) |        |         | Total # deaths | Crude HR | Adj. HR Model | 95% C.I.    |
|-----------------------------|-------|--------------------------|--------|---------|----------------|----------|---------------|-------------|
|                             |       | 1-year                   | 5-year | 10-year |                |          |               |             |
| 3.0 or lower                | 52405 | 1.4                      | 6.6    | 12.3    | 4403           | 1.0      | 1.0           | -----       |
| > 3.0 to 4.0                | 63482 | 1.2                      | 6.3    | 12.3    | 5078           | 0.98     | 0.98          | 0.94 – 1.02 |
| > 4.0 to 5.0                | 37907 | 1.4                      | 6.7    | 12.8    | 3153           | 1.04     | 1.04          | 0.99 – 1.09 |
| > 5.0 to 6.0                | 16053 | 1.5                      | 7.2    | 14.1    | 1466           | 1.15     | 1.12          | 1.06 – 1.19 |
| > 6.0                       | 7813  | 2.1                      | 9.2    | 15.2    | 815            | 1.32     | 1.28          | 1.18 – 1.38 |
| <b>Patients aged 50-69</b>  |       |                          |        |         |                |          |               |             |
| 3.0 or lower                | 42650 | 0.9                      | 4.3    | 7.8     | 2297           | 1.0      | 1.0           | -----       |
| > 3.0 to 4.0                | 51918 | 0.8                      | 4.0    | 7.8     | 2673           | 0.99     | 0.95          | 0.89 – 1.00 |
| > 4.0 to 5.0                | 31713 | 1.0                      | 4.4    | 8.5     | 1771           | 1.10     | 0.98          | 0.92 – 1.04 |
| > 5.0 to 6.0                | 13706 | 1.1                      | 5.4    | 10.3    | 928            | 1.34     | 1.14          | 1.05 – 1.23 |
| > 6.0                       | 6755  | 1.7                      | 6.8    | 11.7    | 547            | 1.60     | 1.25          | 1.13 – 1.38 |
| <b>Patients aged 70-89</b>  |       |                          |        |         |                |          |               |             |
| 3.0 or lower                | 9755  | 3.5                      | 17.3   | 32.9    | 2106           | 1.0      | 1.0           | -----       |
| > 3.0 to 4.0                | 11564 | 3.1                      | 16.9   | 32.4    | 2405           | 0.97     | 1.00          | 0.95 – 1.07 |
| > 4.0 to 5.0                | 6194  | 3.7                      | 18.5   | 35.2    | 1382           | 1.08     | 1.11          | 1.03 – 1.19 |
| > 5.0 to 6.0                | 2347  | 4.0                      | 17.8   | 35.7    | 538            | 1.10     | 1.08          | 0.98 – 1.19 |
| > 6.0                       | 1058  | 4.8                      | 24.4   | 38.4    | 268            | 1.30     | 1.27          | 1.12 – 1.45 |

**Model:** Adjusted for age, race, sex, BMI, current smoker, former smoker, history of the following in the past year: hypertension, atrial fibrillation, arrhythmia, congestive heart failure, cancer, chronic obstructive pulmonary disease, chronic kidney disease, baseline systolic and diastolic blood pressure, glucose, and the following medications in the past year: ACE Inhibitors, beta-blockers, calcium blockers, any SBP lowering medication, diuretics, aspirin, DOACS, anti-depressants, opioids, and statin initiation >1 year after baseline cholesterol measurement.

Supplement Table 6. Risks and Hazard Ratios of Death by Triglycerides to HDL-C Ratio at Baseline

| Triglycerides/<br>HDL-C Ratio | n     | Cumulative incidence (%) |        |         | Total<br># deaths | Crude<br>HR | Adj. HR<br>Model | 95%<br>C.I. |
|-------------------------------|-------|--------------------------|--------|---------|-------------------|-------------|------------------|-------------|
|                               |       | 1-year                   | 5-year | 10-year |                   |             |                  |             |
| Quintile 1                    | 35533 | 0.9                      | 5.1    | 9.7     | 2370              | 0.63        | 0.76             | 0.72 – 0.81 |
| Quintile 2                    | 35403 | 1.2                      | 6.2    | 11.9    | 2771              | 0.77        | 0.84             | 0.80 – 0.88 |
| Quintile 3                    | 35523 | 1.4                      | 6.9    | 13.1    | 3056              | 0.86        | 0.89             | 0.85 – 0.94 |
| Quintile 4                    | 35479 | 1.5                      | 7.2    | 13.9    | 3183              | 0.91        | 0.92             | 0.88 – 0.97 |
| Quintile 5                    | 35513 | 1.7                      | 7.9    | 15.1    | 3518              | 1.0         | 1.0              | -----       |
| <b>Patients aged 50-69</b>    |       |                          |        |         |                   |             |                  |             |
| Quintile 1                    | 29314 | 0.6                      | 3.1    | 5.9     | 1213              | 0.53        | 0.73             | 0.68 – 0.79 |
| Quintile 2                    | 29313 | 0.8                      | 3.9    | 7.3     | 1458              | 0.66        | 0.82             | 0.76 – 0.88 |
| Quintile 3                    | 29213 | 0.9                      | 4.4    | 8.5     | 1634              | 0.76        | 0.89             | 0.84 – 0.96 |
| Quintile 4                    | 29425 | 1.0                      | 4.7    | 9.3     | 1775              | 0.83        | 0.91             | 0.85 – 0.97 |
| Quintile 5                    | 29302 | 1.3                      | 5.8    | 10.8    | 2131              | 1.0         | 1.0              | -----       |
| <b>Patients aged 70-89</b>    |       |                          |        |         |                   |             |                  |             |
| Quintile 1                    | 6169  | 2.8                      | 15.9   | 30.7    | 1232              | 0.80        | 0.84             | 0.77 – 0.91 |
| Quintile 2                    | 6180  | 3.2                      | 16.4   | 31.9    | 1256              | 0.83        | 0.87             | 0.80 – 0.94 |
| Quintile 3                    | 6176  | 3.7                      | 17.9   | 33.6    | 1357              | 0.91        | 0.93             | 0.87 – 1.01 |
| Quintile 4                    | 6180  | 3.7                      | 18.5   | 34.6    | 1375              | 0.93        | 0.96             | 0.89 – 1.04 |
| Quintile 5                    | 6179  | 4.1                      | 19.4   | 37.0    | 1467              | 1.0         | 1.0              | -----       |

**Model:** Adjusted for age, race, sex, BMI, current smoker, former smoker, history of the following in the past year: hypertension, atrial fibrillation, arrhythmia, congestive heart failure, cancer, chronic obstructive pulmonary disease, chronic kidney disease, baseline systolic and diastolic blood pressure, glucose, and the following medications in the past year: ACE Inhibitors, beta-blockers, calcium blockers, any SBP lowering medication, diuretics, aspirin, DOACS, anti-depressants, opioids, and statin initiation >1 year after baseline cholesterol measurement.

1  
2  
3  
4  
5  
6  
7  
8  
9  
10  
11  
12  
13  
14  
15  
16  
17  
18  
19  
20  
21  
22  
23  
24  
25  
26  
27  
28  
29  
30  
31  
32  
33  
34  
35  
36  
37  
38  
39  
40  
41  
42  
43  
44  
45  
46  
47  
48  
49  
50  
51  
52  
53  
54  
55  
56  
57  
58  
59  
60

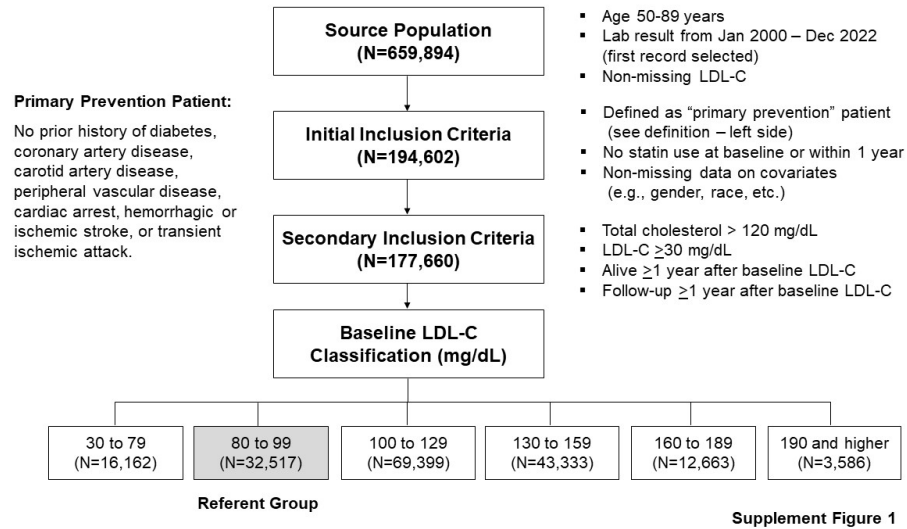

Supplement Figure 1

Supplement Figure 1.  
Flow diagram of selection of patients for the study cohort.

338x190mm (96 x 96 DPI)

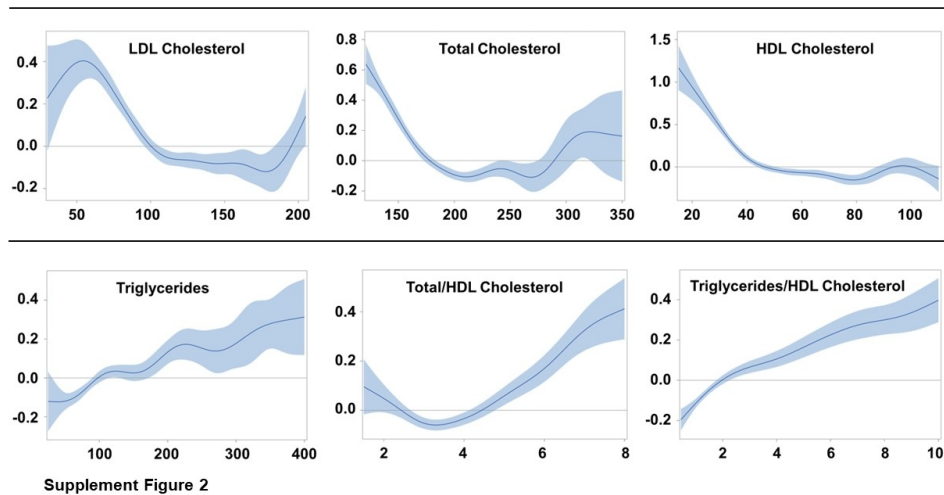

Supplement Figure 2.

Continuous spline plots of the relationship between different lipid parameters and adjusted risk of long-term mortality. The spline includes 95% confidence bands, with narrower bands indicating a higher prevalence of patients with the given lipid value. X-axis values below the horizontal line with 0.0 value indicate lower risk of mortality; X-axis values above the line indicate higher risk of mortality.

338x190mm (96 x 96 DPI)

**STROBE 2007 (v4) Statement—Research Checklist of items that should be included in reports of cohort studies**

| Section/Topic            | Item # | Recommendation                                                                                                                                                                       | Section                                      |
|--------------------------|--------|--------------------------------------------------------------------------------------------------------------------------------------------------------------------------------------|----------------------------------------------|
| Title and abstract       | 1      | (a) Indicate the study's design with a commonly used term in the title or the abstract                                                                                               | Title page                                   |
|                          |        | (b) Provide in the abstract an informative and balanced summary of what was done and what was found                                                                                  | Abstract                                     |
| <b>Introduction</b>      |        |                                                                                                                                                                                      |                                              |
| Background/rationale     | 2      | Explain the scientific background and rationale for the investigation being reported                                                                                                 | Introduction, Paragraphs 1-4                 |
| Objectives               | 3      | State specific objectives, including any prespecified hypotheses                                                                                                                     | Introduction, Paragraph 5                    |
| <b>Methods</b>           |        |                                                                                                                                                                                      |                                              |
| Study design             | 4      | Present key elements of study design early in the paper                                                                                                                              | Methods, Paragraphs 1,3                      |
| Setting                  | 5      | Describe the setting, locations, and relevant dates, including periods of recruitment, exposure, follow-up, and data collection                                                      | Methods, Paragraphs 1-4                      |
| Participants             | 6      | (a) Give the eligibility criteria, and the sources and methods of selection of participants. Describe methods of follow-up                                                           | Methods, Paragraphs 3,5,6<br>Suppl. Figure 1 |
|                          |        | (b) For matched studies, give matching criteria and number of exposed and unexposed                                                                                                  | N/A                                          |
| Variables                | 7      | Clearly define all outcomes, exposures, predictors, potential confounders, and effect modifiers. Give diagnostic criteria, if applicable                                             | Methods, Paragraphs 2-5                      |
| Data sources/measurement | 8*     | For each variable of interest, give sources of data and details of methods of assessment (measurement). Describe comparability of assessment methods if there is more than one group | Methods, Paragraphs 2-5                      |
| Bias                     | 9      | Describe any efforts to address potential sources of bias                                                                                                                            | Methods, Paragraph 3                         |
| Study size               | 10     | Explain how the study size was arrived at                                                                                                                                            | Methods, Paragraph 1, Suppl. Figure 1        |
| Quantitative variables   | 11     | Explain how quantitative variables were handled in the analyses. If applicable, describe which groupings were chosen and why                                                         | Methods, Paragraphs 4-7                      |

|                     |     |                                                                                                                                                                                                                |                                             |
|---------------------|-----|----------------------------------------------------------------------------------------------------------------------------------------------------------------------------------------------------------------|---------------------------------------------|
| Statistical methods | 12  | (a) Describe all statistical methods, including those used to control for confounding                                                                                                                          | Methods,<br>Paragraphs 6,7                  |
|                     |     | (b) Describe any methods used to examine subgroups and interactions                                                                                                                                            | Methods,<br>Paragraph 8                     |
|                     |     | (c) Explain how missing data were addressed                                                                                                                                                                    | Methods,<br>Paragraph 3                     |
|                     |     | (d) If applicable, explain how loss to follow-up was addressed                                                                                                                                                 | N/A                                         |
|                     |     | (e) Describe any sensitivity analyses                                                                                                                                                                          | N/A                                         |
| <b>Results</b>      |     |                                                                                                                                                                                                                |                                             |
| Participants        | 13* | (a) Report numbers of individuals at each stage of study—e.g., numbers potentially eligible, examined for eligibility, confirmed eligible, included in the study, completing follow-up, and analysed           | Suppl. Figure 1                             |
|                     |     | (b) Give reasons for non-participation at each stage                                                                                                                                                           | N/A                                         |
|                     |     | (c) Consider use of a flow diagram                                                                                                                                                                             | Suppl. Figure 1                             |
| Descriptive data    | 14* | (a) Give characteristics of study participants (e.g., demographic, clinical, social) and information on exposures and potential confounders                                                                    | Results<br>Paragraph 1                      |
|                     |     | (b) Indicate number of participants with missing data for each variable of interest                                                                                                                            | N/A                                         |
|                     |     | (c) Summarise follow-up time (e.g., average and total amount)                                                                                                                                                  | Results<br>Paragraph 2                      |
| Outcome data        | 15* | Report numbers of outcome events or summary measures over time                                                                                                                                                 | Results<br>Paragraphs 3,4<br>Tables 2,3     |
| Main results        | 16  | (a) Give unadjusted estimates and, if applicable, confounder-adjusted estimates and their precision (e.g., 95% confidence interval). Make clear which confounders were adjusted for and why they were included | Results<br>Tables 2,3<br>Suppl. Tables 3-6  |
|                     |     | (b) Report category boundaries when continuous variables were categorized                                                                                                                                      | Results<br>Tables 1-3,<br>Suppl. Tables 3-6 |
|                     |     | (c) If relevant, consider translating estimates of relative risk into absolute risk for a meaningful time period                                                                                               | N/A                                         |
| Other analyses      | 17  | Report other analyses done—e.g., analyses of subgroups and interactions, and sensitivity analyses                                                                                                              | Results<br>Paragraphs 5-8                   |
| <b>Discussion</b>   |     |                                                                                                                                                                                                                |                                             |

|                          |    |                                                                                                                                                                            |                                  |
|--------------------------|----|----------------------------------------------------------------------------------------------------------------------------------------------------------------------------|----------------------------------|
| Key results              | 18 | Summarise key results with reference to study objectives                                                                                                                   | Discussion<br>Paragraphs 1,3     |
| <b>Limitations</b>       |    |                                                                                                                                                                            |                                  |
| Interpretation           | 20 | Give a cautious overall interpretation of results considering objectives, limitations, multiplicity of analyses, results from similar studies, and other relevant evidence | Discussion<br>Paragraphs 1,5,6,7 |
| Generalisability         | 21 | Discuss the generalisability (external validity) of the study results                                                                                                      | Discussion<br>Paragraph 6        |
| <b>Other information</b> |    |                                                                                                                                                                            |                                  |
| Funding                  | 22 | Give the source of funding and the role of the funders for the present study and, if applicable, for the original study on which the present article is based              | N/A                              |

\*Give information separately for cases and controls in case-control studies and, if applicable, for exposed and unexposed groups in cohort and cross-sectional studies.

**Note:** An Explanation and Elaboration article discusses each checklist item and gives methodological background and published examples of transparent reporting. The STROBE checklist is best used in conjunction with this article (freely available on the Web sites of PLoS Medicine at <http://www.plosmedicine.org/>, Annals of Internal Medicine at <http://www.annals.org/>, and Epidemiology at <http://www.epidem.com/>). Information on the STROBE Initiative is available at [www.strobe-statement.org](http://www.strobe-statement.org).
